# Supplementary material
Source: publisher figshare collection journal article supplement (https://frontiersin.figshare.com/ndownloader/files/28408026)
Supplement: Supplementary file 1 [file 28408026]

## Sheet: Sheet2
Sum of Net earnings	Column Labels
Row Labels	1000000	2000000	3000000	4000000	5000000	6000000	7000000	8000000	9000000	10000000	11000000	12000000	Grand Total			Juveniles	1M	2M	3M	4M	5M	6M	7M	8M	9M	10M	11M	12M		Juveniles	1M	2M	3M	4M	5M	6M	7M	8M	9M	10M	11M	12M
0	-1000000	-2000000	-3000000	-4000000	-5000000	-6000000	-7000000	-8000000	-9000000	-10000000	-11000000	-12000000	-78000000			0	-1000000	-2000000	-3000000	-4000000	-5000000	-6000000	-7000000	-8000000	-9000000	-10000000	-11000000	-12000000		0	0	0	0	0	0	0	0	0	0	0	0	0
100000	211296	-767032	-1.75981e+06	-2756196	-3.75403e+06	-4752584	-5751552	-6750778	-7.75018e+06	-8.74969e+06	-9.7493e+06	-10748972	-6.30788e+07			100000	211296	-767032	-1.75981e+06	-2756196	-3.75403e+06	-4752584	-5751552	-6750778	-7.75018e+06	-8.74969e+06	-9.7493e+06	-10748972		100000	211296	0	0	0	0	0	0	0	0	0	0	0
200000	1.3359e+06	422592	-548512	-1534064	-2.5254e+06	-3.51962e+06	-4.51549e+06	-5512392	-6.50998e+06	-7.50806e+06	-8.50648e+06	-9505168	-4.84267e+07			200000	1.3359e+06	422592	-548512	-1534064	-2.5254e+06	-3.51962e+06	-4.51549e+06	-5512392	-6.50998e+06	-7.50806e+06	-8.50648e+06	-9505168		200000	1.3359e+06	422592	0	0	0	0	0	0	0	0	0	0
300000	2.37382e+06	1568872	633888	-333604	-1.3141e+06	-2301096	-3.29181e+06	-4.28484e+06	-5.27942e+06	-6.27509e+06	-7.27154e+06	-8268588	-3.40435e+07			300000	2.37382e+06	1568872	633888	-333604	-1.3141e+06	-2301096	-3.29181e+06	-4.28484e+06	-5.27942e+06	-6.27509e+06	-7.27154e+06	-8268588		300000	2.37382e+06	1568872	633888	0	0	0	0	0	0	0	0	0
400000	3325056	2.67181e+06	1.78739e+06	845184	-120141	-1.09702e+06	-2.08051e+06	-3068128	-4058496	-5.05079e+06	-6.04449e+06	-7.03923e+06	-1.99294e+07			400000	3325056	2.67181e+06	1.78739e+06	845184	-120141	-1.09702e+06	-2.08051e+06	-3068128	-4058496	-5.05079e+06	-6.04449e+06	-7.03923e+06		400000	3325056	2.67181e+06	1.78739e+06	845184	0	0	0	0	0	0	0	0
500000	4189600	3731400	2912000	2002300	1056480	92600	-881600	-1862250	-2847200	-3835160	-4.82531e+06	-5817100	-6.08424e+06			500000	4189600	3731400	2912000	2002300	1056480	92600	-881600	-1862250	-2847200	-3835160	-4.82531e+06	-5817100		500000	4189600	3731400	2912000	2002300	1056480	92600	0	0	0	0	0	0
600000	4.96746e+06	4.74765e+06	4007712	3137744	2.21576e+06	1.26778e+06	304928	-667208	-1645536	-2.6282e+06	-3.61401e+06	-4602192	7.49188e+06			600000	4.96746e+06	4.74765e+06	4007712	3137744	2.21576e+06	1.26778e+06	304928	-667208	-1645536	-2.6282e+06	-3.61401e+06	-4602192		600000	4.96746e+06	4.74765e+06	4007712	3137744	2.21576e+06	1.26778e+06	304928	0	0	0	0	0
700000	5.65862e+06	5.72055e+06	5.07453e+06	4.25152e+06	3.35771e+06	2428504	1479072	516998	-453504	-1.42991e+06	-2.4106e+06	-3.39451e+06	2.0799e+07			700000	5.65862e+06	5.72055e+06	5.07453e+06	4.25152e+06	3.35771e+06	2428504	1479072	516998	-453504	-1.42991e+06	-2.4106e+06	-3.39451e+06		700000	5.65862e+06	5.72055e+06	5.07453e+06	4.25152e+06	3.35771e+06	2428504	1479072	516998	0	0	0	0
800000	6.2631e+06	6650112	6.11245e+06	5.34362e+06	4.48232e+06	3.57478e+06	2640832	1.69037e+06	728896	-240282	-1.21506e+06	-2.19405e+06	3.38371e+07			800000	6.2631e+06	6650112	6.11245e+06	5.34362e+06	4.48232e+06	3.57478e+06	2640832	1.69037e+06	728896	-240282	-1.21506e+06	-2.19405e+06		800000	6.2631e+06	6650112	6.11245e+06	5.34362e+06	4.48232e+06	3.57478e+06	2640832	1.69037e+06	728896	0	0	0
900000	6.7809e+06	7.53633e+06	7.12147e+06	6.41404e+06	5.58959e+06	4706616	3.79021e+06	2.8529e+06	1.90166e+06	940674	-27409.5	-1.00081e+06	4.66062e+07			900000	6.7809e+06	7.53633e+06	7.12147e+06	6.41404e+06	5.58959e+06	4706616	3.79021e+06	2.8529e+06	1.90166e+06	940674	-27409.5	-1.00081e+06		900000	6.7809e+06	7.53633e+06	7.12147e+06	6.41404e+06	5.58959e+06	4706616	3.79021e+06	2.8529e+06	1.90166e+06	940674	0	0
1000000	7.212e+06	8379200	8101600	7462800	6679520	5824000	4927200	4004600	3064800	2112960	1.15236e+06	185200	5.91062e+07			1000000	7.212e+06	8379200	8101600	7462800	6679520	5824000	4927200	4004600	3064800	2112960	1.15236e+06	185200		1000000	7.212e+06	8379200	8101600	7462800	6679520	5824000	4927200	4004600	3064800	2112960	1.15236e+06	185200
1100000	7.55642e+06	9.17873e+06	9.05283e+06	8.48988e+06	7.75212e+06	6.92694e+06	6.05181e+06	5.14546e+06	4218304	3.27658e+06	2.32426e+06	1.36399e+06	7.13373e+07			1100000	7.55642e+06	9.17873e+06	9.05283e+06	8.48988e+06	7.75212e+06	6.92694e+06	6.05181e+06	5.14546e+06	4218304	3.27658e+06	2.32426e+06	1.36399e+06		1100000	7.55642e+06	9.17873e+06	9.05283e+06	8.48988e+06	7.75212e+06	6.92694e+06	6.05181e+06	5.14546e+06	4218304	3.27658e+06	2.32426e+06	1.36399e+06
1200000	7.81414e+06	9.93491e+06	9.97517e+06	9.4953e+06	8.80737e+06	8015424	7164032	6275488	5.36218e+06	4.43153e+06	3.48827e+06	2.53555e+06	8.32994e+07			1200000	7.81414e+06	9.93491e+06	9.97517e+06	9.4953e+06	8.80737e+06	8015424	7164032	6275488	5.36218e+06	4.43153e+06	3.48827e+06	2.53555e+06		1200000	7.81414e+06	9.93491e+06	9.97517e+06	9.4953e+06	8.80737e+06	8015424	7164032	6275488	5.36218e+06	4.43153e+06	3.48827e+06	2.53555e+06
1300000	7.98518e+06	1.06478e+07	1.08686e+07	1.0479e+07	9.84529e+06	9.08946e+06	8.26387e+06	7394678	6.49642e+06	5.57781e+06	4.6444e+06	3.69989e+06	9.49924e+07			1300000	7.98518e+06	1.06478e+07	1.08686e+07	1.0479e+07	9.84529e+06	9.08946e+06	8.26387e+06	7394678	6.49642e+06	5.57781e+06	4.6444e+06	3.69989e+06		1300000	7.98518e+06	1.06478e+07	1.08686e+07	1.0479e+07	9.84529e+06	9.08946e+06	8.26387e+06	7394678	6.49642e+06	5.57781e+06	4.6444e+06	3.69989e+06
1400000	8.06954e+06	1.13172e+07	1.17332e+07	1.14411e+07	1.08659e+07	1.01491e+07	9.35133e+06	8.50303e+06	7.62102e+06	6.71542e+06	5.79265e+06	4857008	1.06416e+08			1400000	8.06954e+06	1.13172e+07	1.17332e+07	1.14411e+07	1.08659e+07	1.01491e+07	9.35133e+06	8.50303e+06	7.62102e+06	6.71542e+06	5.79265e+06	4857008		1400000	8.06954e+06	1.13172e+07	1.17332e+07	1.14411e+07	1.08659e+07	1.01491e+07	9.35133e+06	8.50303e+06	7.62102e+06	6.71542e+06	5.79265e+06	4857008
1500000	8.0672e+06	1.19434e+07	12568800	12381500	11869120	1.11942e+07	1.04264e+07	9.60055e+06	8.736e+06	7.84436e+06	6.93302e+06	6.0069e+06	1.17571e+08			1500000	8.0672e+06	1.19434e+07	12568800	12381500	11869120	1.11942e+07	1.04264e+07	9.60055e+06	8.736e+06	7.84436e+06	6.93302e+06	6.0069e+06		1500000	8.0672e+06	1.19434e+07	12568800	12381500	11869120	1.11942e+07	1.04264e+07	9.60055e+06	8.736e+06	7.84436e+06	6.93302e+06	6.0069e+06
1600000	7.97818e+06	1.25262e+07	1.33756e+07	13300224	1.2855e+07	1.22249e+07	1.14891e+07	1.06872e+07	9.84134e+06	8.96463e+06	8.06551e+06	7.14957e+06	1.28457e+08			1600000	7.97818e+06	1.25262e+07	1.33756e+07	13300224	1.2855e+07	1.22249e+07	1.14891e+07	1.06872e+07	9.84134e+06	8.96463e+06	8.06551e+06	7.14957e+06		1600000	7.97818e+06	1.25262e+07	1.33756e+07	13300224	1.2855e+07	1.22249e+07	1.14891e+07	1.06872e+07	9.84134e+06	8.96463e+06	8.06551e+06	7.14957e+06
1700000	7.80246e+06	1.30657e+07	1.41534e+07	1.41973e+07	1.38236e+07	1.32411e+07	1.25394e+07	1.17631e+07	1.09371e+07	1.00762e+07	9.19011e+06	8285012	1.39074e+08			1700000	7.80246e+06	1.30657e+07	1.41534e+07	1.41973e+07	1.38236e+07	1.32411e+07	1.25394e+07	1.17631e+07	1.09371e+07	1.00762e+07	9.19011e+06	8285012		1700000	7.80246e+06	1.30657e+07	1.41534e+07	1.41973e+07	1.38236e+07	1.32411e+07	1.25394e+07	1.17631e+07	1.09371e+07	1.00762e+07	9.19011e+06	8285012
1800000	7.54006e+06	1.35618e+07	1.49024e+07	1.50727e+07	1.47748e+07	1.42429e+07	13577312	1.28281e+07	1.20231e+07	1.11792e+07	1.03068e+07	9413232	1.49422e+08			1800000	7.54006e+06	1.35618e+07	1.49024e+07	1.50727e+07	1.47748e+07	1.42429e+07	13577312	1.28281e+07	1.20231e+07	1.11792e+07	1.03068e+07	9413232		1800000	7.54006e+06	1.35618e+07	1.49024e+07	1.50727e+07	1.47748e+07	1.42429e+07	13577312	1.28281e+07	1.20231e+07	1.11792e+07	1.03068e+07	9413232
1900000	7.19098e+06	1.40146e+07	1.56224e+07	1.59264e+07	1.57087e+07	1.52303e+07	1.46028e+07	13882262	1.30996e+07	1.22734e+07	1.14157e+07	1.05342e+07	1.59501e+08			1900000	7.19098e+06	1.40146e+07	1.56224e+07	1.59264e+07	1.57087e+07	1.52303e+07	1.46028e+07	13882262	1.30996e+07	1.22734e+07	1.14157e+07	1.05342e+07		1900000	7.19098e+06	1.40146e+07	1.56224e+07	1.59264e+07	1.57087e+07	1.52303e+07	1.46028e+07	13882262	1.30996e+07	1.22734e+07	1.14157e+07	1.05342e+07
2000000	6.7552e+06	1.4424e+07	16313600	16758400	16625280	16203200	15616000	14925600	14166400	13359040	1.25167e+07	11648000	1.69311e+08			2000000	6.7552e+06	1.4424e+07	16313600	16758400	16625280	16203200	15616000	14925600	14166400	13359040	1.25167e+07	11648000		2000000	6.7552e+06	1.4424e+07	16313600	16758400	16625280	16203200	15616000	14925600	14166400	13359040	1.25167e+07	11648000
2100000	6.23274e+06	14790088	16975872	1.75688e+07	1.75245e+07	1.71617e+07	1.66168e+07	15958102	15223584	1.4436e+07	1.36097e+07	1.27545e+07	1.78852e+08			2100000	6.23274e+06	14790088	16975872	1.75688e+07	1.75245e+07	1.71617e+07	1.66168e+07	15958102	15223584	1.4436e+07	1.36097e+07	1.27545e+07		2100000	6.23274e+06	14790088	16975872	1.75688e+07	1.75245e+07	1.71617e+07	1.66168e+07	15958102	15223584	1.4436e+07	1.36097e+07	1.27545e+07
2200000	5.62358e+06	1.51128e+07	17609248	1.83575e+07	1.84064e+07	1.81057e+07	17605152	1.69798e+07	1.62711e+07	1.55042e+07	1.46949e+07	1.38539e+07	1.88124e+08			2200000	5.62358e+06	1.51128e+07	17609248	1.83575e+07	1.84064e+07	1.81057e+07	17605152	1.69798e+07	1.62711e+07	1.55042e+07	1.46949e+07	1.38539e+07		2200000	5.62358e+06	1.51128e+07	17609248	1.83575e+07	1.84064e+07	1.81057e+07	17605152	1.69798e+07	1.62711e+07	1.55042e+07	1.46949e+07	1.38539e+07
2300000	4.92774e+06	15392232	18213728	19124476	1.92709e+07	1.90352e+07	18581152	17990598	1.73091e+07	1.65638e+07	1.57723e+07	1.4946e+07	1.97127e+08			2300000	4.92774e+06	15392232	18213728	19124476	1.92709e+07	1.90352e+07	18581152	17990598	1.73091e+07	1.65638e+07	1.57723e+07	1.4946e+07		2300000	4.92774e+06	15392232	18213728	19124476	1.92709e+07	1.90352e+07	18581152	17990598	1.73091e+07	1.65638e+07	1.57723e+07	1.4946e+07
2400000	4.14522e+06	1.56283e+07	1.87893e+07	1.98698e+07	2.01181e+07	1.99503e+07	1.95448e+07	1.89906e+07	1.83373e+07	1.76147e+07	1.68417e+07	16030848	2.05861e+08			2400000	4.14522e+06	1.56283e+07	1.87893e+07	1.98698e+07	2.01181e+07	1.99503e+07	1.95448e+07	1.89906e+07	1.83373e+07	1.76147e+07	1.68417e+07	16030848		2400000	4.14522e+06	1.56283e+07	1.87893e+07	1.98698e+07	2.01181e+07	1.99503e+07	1.95448e+07	1.89906e+07	1.83373e+07	1.76147e+07	1.68417e+07	16030848
2500000	3.276e+06	15821000	19336000	2.05935e+07	2.0948e+07	20851000	2.0496e+07	19979750	1.9356e+07	1.8657e+07	1.79033e+07	1.71085e+07	2.14326e+08			2500000	3.276e+06	15821000	19336000	2.05935e+07	2.0948e+07	20851000	2.0496e+07	19979750	1.9356e+07	1.8657e+07	1.79033e+07	1.71085e+07		2500000	3.276e+06	15821000	19336000	2.05935e+07	2.0948e+07	20851000	2.0496e+07	19979750	1.9356e+07	1.8657e+07	1.79033e+07	1.71085e+07
2600000	2.3201e+06	1.59704e+07	1.98538e+07	2.12955e+07	2.17605e+07	2.17372e+07	2.14348e+07	2.09581e+07	2.0365e+07	1.96906e+07	1.8957e+07	1.81789e+07	2.22522e+08			2600000	2.3201e+06	1.59704e+07	1.98538e+07	2.12955e+07	2.17605e+07	2.17372e+07	2.14348e+07	2.09581e+07	2.0365e+07	1.96906e+07	1.8957e+07	1.81789e+07		2600000	2.3201e+06	1.59704e+07	1.98538e+07	2.12955e+07	2.17605e+07	2.17372e+07	2.14348e+07	2.09581e+07	2.0365e+07	1.96906e+07	1.8957e+07	1.81789e+07
2700000	1.2775e+06	16076392	20342688	2.19758e+07	2.25557e+07	2.2609e+07	2.23613e+07	21925558	2.13644e+07	2.07155e+07	2.00028e+07	1.92421e+07	2.30449e+08			2700000	1.2775e+06	16076392	20342688	2.19758e+07	2.25557e+07	2.2609e+07	2.23613e+07	21925558	2.13644e+07	2.07155e+07	2.00028e+07	1.92421e+07		2700000	1.2775e+06	16076392	20342688	2.19758e+07	2.25557e+07	2.2609e+07	2.23613e+07	21925558	2.13644e+07	2.07155e+07	2.00028e+07	1.92421e+07
2800000	148224	1.61391e+07	20802688	2.26345e+07	2.33336e+07	2.34663e+07	2.32754e+07	2.28822e+07	22354176	2.17318e+07	2.10407e+07	2.02981e+07	2.38107e+08			2800000	148224	1.61391e+07	20802688	2.26345e+07	2.33336e+07	2.34663e+07	2.32754e+07	2.28822e+07	22354176	2.17318e+07	2.10407e+07	2.02981e+07		2800000	148224	1.61391e+07	20802688	2.26345e+07	2.33336e+07	2.34663e+07	2.32754e+07	2.28822e+07	22354176	2.17318e+07	2.10407e+07	2.02981e+07
2900000	-1.06774e+06	1.61584e+07	2.12338e+07	2.32715e+07	2.40941e+07	2.43092e+07	2.41771e+07	2.3828e+07	2.33343e+07	2.27393e+07	2.20707e+07	21346868	2.45496e+08			2900000	-1.06774e+06	1.61584e+07	2.12338e+07	2.32715e+07	2.40941e+07	2.43092e+07	2.41771e+07	2.3828e+07	2.33343e+07	2.27393e+07	2.20707e+07	21346868		2900000	0	1.61584e+07	2.12338e+07	2.32715e+07	2.40941e+07	2.43092e+07	2.41771e+07	2.3828e+07	2.33343e+07	2.27393e+07	2.20707e+07	21346868
3000000	-2.3704e+06	1.61344e+07	21636000	2.38868e+07	24837280	25137600	25066400	24763000	24304800	23738240	2.30929e+07	2.23884e+07	2.52615e+08			3000000	-2.3704e+06	1.61344e+07	21636000	2.38868e+07	24837280	25137600	25066400	24763000	24304800	23738240	2.30929e+07	2.23884e+07		3000000	0	1.61344e+07	21636000	2.38868e+07	24837280	25137600	25066400	24763000	24304800	23738240	2.30929e+07	2.23884e+07
3100000	-3.75974e+06	1.6067e+07	2.20093e+07	2.44804e+07	2.55631e+07	2.59516e+07	2.59433e+07	2.56871e+07	2.52657e+07	2.47285e+07	2.41072e+07	23422708	2.59466e+08			3100000	-3.75974e+06	1.6067e+07	2.20093e+07	2.44804e+07	2.55631e+07	2.59516e+07	2.59433e+07	2.56871e+07	2.52657e+07	2.47285e+07	2.41072e+07	23422708		3100000	0	1.6067e+07	2.20093e+07	2.44804e+07	2.55631e+07	2.59516e+07	2.59433e+07	2.56871e+07	2.52657e+07	2.47285e+07	2.41072e+07	23422708
3200000	-5.23578e+06	1.59564e+07	22353728	2.50524e+07	2.62716e+07	2.67511e+07	2.68079e+07	26600448	26216896	2.57101e+07	2.51135e+07	2.44498e+07	2.66048e+08			3200000	-5.23578e+06	1.59564e+07	22353728	2.50524e+07	2.62716e+07	2.67511e+07	2.68079e+07	26600448	26216896	2.57101e+07	2.51135e+07	2.44498e+07		3200000	0	1.59564e+07	22353728	2.50524e+07	2.62716e+07	2.67511e+07	2.68079e+07	26600448	26216896	2.57101e+07	2.51135e+07	2.44498e+07
3300000	-6.7985e+06	1.58023e+07	22669248	2.56027e+07	2.69628e+07	2.75362e+07	2.766e+07	27502918	27158496	2.6683e+07	2.61121e+07	2.54697e+07	2.72361e+08			3300000	-6.7985e+06	1.58023e+07	22669248	2.56027e+07	2.69628e+07	2.75362e+07	2.766e+07	27502918	27158496	2.6683e+07	2.61121e+07	2.54697e+07		3300000	0	1.58023e+07	22669248	2.56027e+07	2.69628e+07	2.75362e+07	2.766e+07	27502918	27158496	2.6683e+07	2.61121e+07	2.54697e+07
3400000	-8.4479e+06	1.56049e+07	2.29559e+07	2.61313e+07	2.76366e+07	2.83068e+07	2.84998e+07	2.83946e+07	2.80905e+07	2.76472e+07	2.71027e+07	2.64823e+07	2.78405e+08			3400000	-8.4479e+06	1.56049e+07	2.29559e+07	2.61313e+07	2.76366e+07	2.83068e+07	2.84998e+07	2.83946e+07	2.80905e+07	2.76472e+07	2.71027e+07	2.64823e+07		3400000	0	1.56049e+07	2.29559e+07	2.61313e+07	2.76366e+07	2.83068e+07	2.84998e+07	2.83946e+07	2.80905e+07	2.76472e+07	2.71027e+07	2.64823e+07
3500000	-1.0184e+07	15364200	2.32136e+07	26638300	28293120	2.9063e+07	2.93272e+07	2.92754e+07	2.90128e+07	2.86028e+07	2.80855e+07	27487700	2.84179e+08			3500000	-1.0184e+07	15364200	2.32136e+07	26638300	28293120	2.9063e+07	2.93272e+07	2.92754e+07	2.90128e+07	2.86028e+07	2.80855e+07	27487700		3500000	0	15364200	2.32136e+07	26638300	28293120	2.9063e+07	2.93272e+07	2.92754e+07	2.90128e+07	2.86028e+07	2.80855e+07	27487700
3600000	-1.20068e+07	1.50801e+07	2.34424e+07	2.71236e+07	2.89323e+07	2.98047e+07	3.01422e+07	3.01453e+07	29925504	2.95497e+07	2.90603e+07	2.84859e+07	2.89685e+08			3600000	-1.20068e+07	1.50801e+07	2.34424e+07	2.71236e+07	2.89323e+07	2.98047e+07	3.01422e+07	3.01453e+07	29925504	2.95497e+07	2.90603e+07	2.84859e+07		3600000	0	1.50801e+07	2.34424e+07	2.71236e+07	2.89323e+07	2.98047e+07	3.01422e+07	3.01453e+07	29925504	2.95497e+07	2.90603e+07	2.84859e+07
3700000	-1.39163e+07	1.47527e+07	2.36424e+07	2.75872e+07	2.95541e+07	3.0532e+07	3.09448e+07	3.10044e+07	3.08286e+07	3.04879e+07	3.00273e+07	2.94769e+07	2.94922e+08			3700000	-1.39163e+07	1.47527e+07	2.36424e+07	2.75872e+07	2.95541e+07	3.0532e+07	3.09448e+07	3.10044e+07	3.08286e+07	3.04879e+07	3.00273e+07	2.94769e+07		3700000	0	1.47527e+07	2.36424e+07	2.75872e+07	2.95541e+07	3.0532e+07	3.09448e+07	3.10044e+07	3.08286e+07	3.04879e+07	3.00273e+07	2.94769e+07
3800000	-1.59124e+07	1.4382e+07	2.38134e+07	2.80291e+07	3.01586e+07	3.12449e+07	3.17351e+07	3.18527e+07	31722016	3.14174e+07	3.09864e+07	3.04606e+07	2.9989e+08			3800000	-1.59124e+07	1.4382e+07	2.38134e+07	2.80291e+07	3.01586e+07	3.12449e+07	3.17351e+07	3.18527e+07	31722016	3.14174e+07	3.09864e+07	3.04606e+07		3800000	0	1.4382e+07	2.38134e+07	2.80291e+07	3.01586e+07	3.12449e+07	3.17351e+07	3.18527e+07	31722016	3.14174e+07	3.09864e+07	3.04606e+07
3900000	-1.79953e+07	1.39678e+07	2.39556e+07	2.84494e+07	3.07457e+07	3.19433e+07	3.25129e+07	3.26902e+07	32605824	3.23383e+07	3.19377e+07	3.14371e+07	3.04589e+08			3900000	-1.79953e+07	1.39678e+07	2.39556e+07	2.84494e+07	3.07457e+07	3.19433e+07	3.25129e+07	3.26902e+07	32605824	3.23383e+07	3.19377e+07	3.14371e+07		3900000	0	1.39678e+07	2.39556e+07	2.84494e+07	3.07457e+07	3.19433e+07	3.25129e+07	3.26902e+07	32605824	3.23383e+07	3.19377e+07	3.14371e+07
4000000	-2.01648e+07	1.35104e+07	2.40688e+07	2.8848e+07	3.13155e+07	32627200	33278400	33516800	33480000	33250560	3.2881e+07	32406400	3.09018e+08			4000000	-2.01648e+07	1.35104e+07	2.40688e+07	2.8848e+07	3.13155e+07	32627200	33278400	33516800	33480000	33250560	3.2881e+07	32406400		4000000	0	1.35104e+07	2.40688e+07	2.8848e+07	3.13155e+07	32627200	33278400	33516800	33480000	33250560	3.2881e+07	32406400
4100000	-2.2421e+07	1.30096e+07	2.41532e+07	2.92249e+07	3.1868e+07	3.32967e+07	3.40315e+07	3.43326e+07	3.43445e+07	3.41541e+07	3.38165e+07	3.33685e+07	3.13179e+08			4100000	-2.2421e+07	1.30096e+07	2.41532e+07	2.92249e+07	3.1868e+07	3.32967e+07	3.40315e+07	3.43326e+07	3.43445e+07	3.41541e+07	3.38165e+07	3.33685e+07		4100000	0	1.30096e+07	2.41532e+07	2.92249e+07	3.1868e+07	3.32967e+07	3.40315e+07	3.43326e+07	3.43445e+07	3.41541e+07	3.38165e+07	3.33685e+07
4200000	-2.47639e+07	1.24655e+07	24208608	29580176	3.24031e+07	33951744	3.47722e+07	3.51375e+07	35199456	3.5049e+07	3.47441e+07	3.43233e+07	3.17071e+08			4200000	-2.47639e+07	1.24655e+07	24208608	29580176	3.24031e+07	33951744	3.47722e+07	3.51375e+07	35199456	3.5049e+07	3.47441e+07	3.43233e+07		4200000	0	1.24655e+07	24208608	29580176	3.24031e+07	33951744	3.47722e+07	3.51375e+07	35199456	3.5049e+07	3.47441e+07	3.43233e+07
4300000	-2.71935e+07	1.1878e+07	2.42352e+07	2.99138e+07	3.29209e+07	34592344	3.55005e+07	3.59316e+07	3.60447e+07	3.59352e+07	3.56638e+07	3.52709e+07	3.20693e+08			4300000	-2.71935e+07	1.1878e+07	2.42352e+07	2.99138e+07	3.29209e+07	34592344	3.55005e+07	3.59316e+07	3.60447e+07	3.59352e+07	3.56638e+07	3.52709e+07		4300000	0	1.1878e+07	2.42352e+07	2.99138e+07	3.29209e+07	34592344	3.55005e+07	3.59316e+07	3.60447e+07	3.59352e+07	3.56638e+07	3.52709e+07
4400000	-2.97098e+07	1.12472e+07	2.42328e+07	3.02257e+07	3.34214e+07	35218496	3.62164e+07	3.67149e+07	3.68804e+07	3.68128e+07	36575616	3.62113e+07	3.24047e+08			4400000	-2.97098e+07	1.12472e+07	2.42328e+07	3.02257e+07	3.34214e+07	35218496	3.62164e+07	3.67149e+07	3.68804e+07	3.68128e+07	36575616	3.62113e+07		4400000	0	1.12472e+07	2.42328e+07	3.02257e+07	3.34214e+07	35218496	3.62164e+07	3.67149e+07	3.68804e+07	3.68128e+07	36575616	3.62113e+07
4500000	-3.23128e+07	1.0573e+07	2.42016e+07	30515900	33904480	35830200	3.692e+07	37487350	37706400	37681640	3.74796e+07	37144500	3.27132e+08			4500000	-3.23128e+07	1.0573e+07	2.42016e+07	30515900	33904480	35830200	3.692e+07	37487350	37706400	37681640	3.74796e+07	37144500		4500000	0	1.0573e+07	2.42016e+07	30515900	33904480	35830200	3.692e+07	37487350	37706400	37681640	3.74796e+07	37144500
4600000	-3.50025e+07	9.85549e+06	2.41415e+07	30784464	3.43703e+07	36427456	3.76112e+07	38248952	3.85228e+07	3.85418e+07	3.83756e+07	3.80704e+07	3.29948e+08			4600000	-3.50025e+07	9.85549e+06	2.41415e+07	30784464	3.43703e+07	36427456	3.76112e+07	38248952	3.85228e+07	3.85418e+07	3.83756e+07	3.80704e+07		4600000	0	9.85549e+06	2.41415e+07	30784464	3.43703e+07	36427456	3.76112e+07	38248952	3.85228e+07	3.85418e+07	3.83756e+07	3.80704e+07
4700000	-3.77788e+07	9.09463e+06	2.40524e+07	3.10314e+07	3.48187e+07	37010264	3.829e+07	3.89997e+07	39329536	3.93934e+07	3.92638e+07	3.89892e+07	3.32494e+08			4700000	-3.77788e+07	9.09463e+06	2.40524e+07	3.10314e+07	3.48187e+07	37010264	3.829e+07	3.89997e+07	39329536	3.93934e+07	3.92638e+07	3.89892e+07		4700000	0	9.09463e+06	2.40524e+07	3.10314e+07	3.48187e+07	37010264	3.829e+07	3.89997e+07	39329536	3.93934e+07	3.92638e+07	3.89892e+07
4800000	-4.06419e+07	8.29043e+06	23934528	3.12566e+07	3.52498e+07	3.75786e+07	3.89564e+07	3.97396e+07	4.01267e+07	4.02363e+07	4.01441e+07	3.99007e+07	3.34772e+08			4800000	-4.06419e+07	8.29043e+06	23934528	3.12566e+07	3.52498e+07	3.75786e+07	3.89564e+07	3.97396e+07	4.01267e+07	4.02363e+07	4.01441e+07	3.99007e+07		4800000	0	8.29043e+06	23934528	3.12566e+07	3.52498e+07	3.75786e+07	3.89564e+07	3.97396e+07	4.01267e+07	4.02363e+07	4.01441e+07	3.99007e+07
4900000	-4.35916e+07	7.44289e+06	2.37877e+07	31460124	3.56636e+07	38132536	3.96104e+07	4.04687e+07	4.09141e+07	4.10705e+07	4.10165e+07	4.08049e+07	3.3678e+08			4900000	-4.35916e+07	7.44289e+06	2.37877e+07	31460124	3.56636e+07	38132536	3.96104e+07	4.04687e+07	4.09141e+07	4.10705e+07	4.10165e+07	4.08049e+07		4900000	0	7.44289e+06	2.37877e+07	31460124	3.56636e+07	38132536	3.96104e+07	4.04687e+07	4.09141e+07	4.10705e+07	4.10165e+07	4.08049e+07
5000000	-4.6628e+07	6.552e+06	2.3612e+07	31642000	36060000	38672000	40252000	4.1187e+07	41692000	4.1896e+07	4.18811e+07	41702000	3.3852e+08			5000000	-4.6628e+07	6.552e+06	2.3612e+07	31642000	36060000	38672000	40252000	4.1187e+07	41692000	4.1896e+07	4.18811e+07	41702000		5000000	0	6.552e+06	2.3612e+07	31642000	36060000	38672000	40252000	4.1187e+07	41692000	4.1896e+07	4.18811e+07	41702000
Grand Total	-3.11875e+08	567395400	826485600	930530700	9.72558e+08	983575800	976874400	959098350	933939200	9.03612e+08	8.69526e+08	832620900	9.44434e+09

## Sheet: Sheet4
Sum of Net earnings	Column Labels
Row Labels	0	100000	200000	300000	400000	500000	600000	700000	800000	900000	1000000	1100000	1200000	1300000	1400000	1500000	1600000	1700000	1800000	1900000	2000000	2100000	2200000	2300000	2400000	2500000	2600000	2700000	2800000	2900000	3000000	3100000	3200000	3300000	3400000	3500000	3600000	3700000	3800000	3900000	4000000	4100000	4200000	4300000	4400000	4500000	4600000	4700000	4800000
1000000	-1000000	211296	1.3359e+06	2.37382e+06	3325056	4189600	4.96746e+06	5.65862e+06	6.2631e+06	6.7809e+06	7.212e+06	7.55642e+06	7.81414e+06	7.98518e+06	8.06954e+06	8.0672e+06	7.97818e+06	7.80246e+06	7.54006e+06	7.19098e+06	6.7552e+06	6.23274e+06	5.62358e+06	4.92774e+06	4.14522e+06	3.276e+06	2.3201e+06	1.2775e+06	148224	-1.06774e+06	-2.3704e+06	-3.75974e+06	-5.23578e+06	-6.7985e+06	-8.4479e+06	-1.0184e+07	-1.20068e+07	-1.39163e+07	-1.59124e+07	-1.79953e+07	-2.01648e+07	-2.2421e+07	-2.47639e+07	-2.71935e+07	-2.97098e+07	-3.23128e+07	-3.50025e+07	-3.77788e+07	-4.06419e+07
2000000	-2000000	-767032	422592	1568872	2.67181e+06	3731400	4.74765e+06	5.72055e+06	6650112	7.53633e+06	8379200	9.17873e+06	9.93491e+06	1.06478e+07	1.13172e+07	1.19434e+07	1.25262e+07	1.30657e+07	1.35618e+07	1.40146e+07	1.4424e+07	14790088	1.51128e+07	15392232	1.56283e+07	15821000	1.59704e+07	16076392	1.61391e+07	1.61584e+07	1.61344e+07	1.6067e+07	1.59564e+07	1.58023e+07	1.56049e+07	15364200	1.50801e+07	1.47527e+07	1.4382e+07	1.39678e+07	1.35104e+07	1.30096e+07	1.24655e+07	1.1878e+07	1.12472e+07	1.0573e+07	9.85549e+06	9.09463e+06	8.29043e+06
3000000	-3000000	-1.75981e+06	-548512	633888	1.78739e+06	2912000	4007712	5.07453e+06	6.11245e+06	7.12147e+06	8101600	9.05283e+06	9.97517e+06	1.08686e+07	1.17332e+07	12568800	1.33756e+07	1.41534e+07	1.49024e+07	1.56224e+07	16313600	16975872	17609248	18213728	1.87893e+07	19336000	1.98538e+07	20342688	20802688	2.12338e+07	21636000	2.20093e+07	22353728	22669248	2.29559e+07	2.32136e+07	2.34424e+07	2.36424e+07	2.38134e+07	2.39556e+07	2.40688e+07	2.41532e+07	24208608	2.42352e+07	2.42328e+07	2.42016e+07	2.41415e+07	2.40524e+07	23934528
4000000	-4000000	-2756196	-1534064	-333604	845184	2002300	3137744	4.25152e+06	5.34362e+06	6.41404e+06	7462800	8.48988e+06	9.4953e+06	1.0479e+07	1.14411e+07	12381500	13300224	1.41973e+07	1.50727e+07	1.59264e+07	16758400	1.75688e+07	1.83575e+07	19124476	1.98698e+07	2.05935e+07	2.12955e+07	2.19758e+07	2.26345e+07	2.32715e+07	2.38868e+07	2.44804e+07	2.50524e+07	2.56027e+07	2.61313e+07	26638300	2.71236e+07	2.75872e+07	2.80291e+07	2.84494e+07	2.8848e+07	2.92249e+07	29580176	2.99138e+07	3.02257e+07	30515900	30784464	3.10314e+07	3.12566e+07
5000000	-5000000	-3.75403e+06	-2.5254e+06	-1.3141e+06	-120141	1056480	2.21576e+06	3.35771e+06	4.48232e+06	5.58959e+06	6679520	7.75212e+06	8.80737e+06	9.84529e+06	1.08659e+07	11869120	1.2855e+07	1.38236e+07	1.47748e+07	1.57087e+07	16625280	1.75245e+07	1.84064e+07	1.92709e+07	2.01181e+07	2.0948e+07	2.17605e+07	2.25557e+07	2.33336e+07	2.40941e+07	24837280	2.55631e+07	2.62716e+07	2.69628e+07	2.76366e+07	28293120	2.89323e+07	2.95541e+07	3.01586e+07	3.07457e+07	3.13155e+07	3.1868e+07	3.24031e+07	3.29209e+07	3.34214e+07	33904480	3.43703e+07	3.48187e+07	3.52498e+07
6000000	-6000000	-4752584	-3.51962e+06	-2301096	-1.09702e+06	92600	1.26778e+06	2428504	3.57478e+06	4706616	5824000	6.92694e+06	8015424	9.08946e+06	1.01491e+07	1.11942e+07	1.22249e+07	1.32411e+07	1.42429e+07	1.52303e+07	16203200	1.71617e+07	1.81057e+07	1.90352e+07	1.99503e+07	20851000	2.17372e+07	2.2609e+07	2.34663e+07	2.43092e+07	25137600	2.59516e+07	2.67511e+07	2.75362e+07	2.83068e+07	2.9063e+07	2.98047e+07	3.0532e+07	3.12449e+07	3.19433e+07	32627200	3.32967e+07	33951744	34592344	35218496	35830200	36427456	37010264	3.75786e+07
7000000	-7000000	-5751552	-4.51549e+06	-3.29181e+06	-2.08051e+06	-881600	304928	1479072	2640832	3.79021e+06	4927200	6.05181e+06	7164032	8.26387e+06	9.35133e+06	1.04264e+07	1.14891e+07	1.25394e+07	13577312	1.46028e+07	15616000	1.66168e+07	17605152	18581152	1.95448e+07	2.0496e+07	2.14348e+07	2.23613e+07	2.32754e+07	2.41771e+07	25066400	2.59433e+07	2.68079e+07	2.766e+07	2.84998e+07	2.93272e+07	3.01422e+07	3.09448e+07	3.17351e+07	3.25129e+07	33278400	3.40315e+07	3.47722e+07	3.55005e+07	3.62164e+07	3.692e+07	3.76112e+07	3.829e+07	3.89564e+07
8000000	-8000000	-6750778	-5512392	-4.28484e+06	-3068128	-1862250	-667208	516998	1.69037e+06	2.8529e+06	4004600	5.14546e+06	6275488	7394678	8.50303e+06	9.60055e+06	1.06872e+07	1.17631e+07	1.28281e+07	13882262	14925600	15958102	1.69798e+07	17990598	1.89906e+07	19979750	2.09581e+07	21925558	2.28822e+07	2.3828e+07	24763000	2.56871e+07	26600448	27502918	2.83946e+07	2.92754e+07	3.01453e+07	3.10044e+07	3.18527e+07	3.26902e+07	33516800	3.43326e+07	3.51375e+07	3.59316e+07	3.67149e+07	37487350	38248952	3.89997e+07	3.97396e+07
9000000	-9000000	-7.75018e+06	-6.50998e+06	-5.27942e+06	-4058496	-2847200	-1645536	-453504	728896	1.90166e+06	3064800	4218304	5.36218e+06	6.49642e+06	7.62102e+06	8.736e+06	9.84134e+06	1.09371e+07	1.20231e+07	1.30996e+07	14166400	15223584	1.62711e+07	1.73091e+07	1.83373e+07	1.9356e+07	2.0365e+07	2.13644e+07	22354176	2.33343e+07	24304800	2.52657e+07	26216896	27158496	2.80905e+07	2.90128e+07	29925504	3.08286e+07	31722016	32605824	33480000	3.43445e+07	35199456	3.60447e+07	3.68804e+07	37706400	3.85228e+07	39329536	4.01267e+07
10000000	-10000000	-8.74969e+06	-7.50806e+06	-6.27509e+06	-5.05079e+06	-3835160	-2.6282e+06	-1.42991e+06	-240282	940674	2112960	3.27658e+06	4.43153e+06	5.57781e+06	6.71542e+06	7.84436e+06	8.96463e+06	1.00762e+07	1.11792e+07	1.22734e+07	13359040	1.4436e+07	1.55042e+07	1.65638e+07	1.76147e+07	1.8657e+07	1.96906e+07	2.07155e+07	2.17318e+07	2.27393e+07	23738240	2.47285e+07	2.57101e+07	2.6683e+07	2.76472e+07	2.86028e+07	2.95497e+07	3.04879e+07	3.14174e+07	3.23383e+07	33250560	3.41541e+07	3.5049e+07	3.59352e+07	3.68128e+07	37681640	3.85418e+07	3.93934e+07	4.02363e+07
11000000	-11000000	-9.7493e+06	-8.50648e+06	-7.27154e+06	-6.04449e+06	-4.82531e+06	-3.61401e+06	-2.4106e+06	-1.21506e+06	-27409.5	1.15236e+06	2.32426e+06	3.48827e+06	4.6444e+06	5.79265e+06	6.93302e+06	8.06551e+06	9.19011e+06	1.03068e+07	1.14157e+07	1.25167e+07	1.36097e+07	1.46949e+07	1.57723e+07	1.68417e+07	1.79033e+07	1.8957e+07	2.00028e+07	2.10407e+07	2.20707e+07	2.30929e+07	2.41072e+07	2.51135e+07	2.61121e+07	2.71027e+07	2.80855e+07	2.90603e+07	3.00273e+07	3.09864e+07	3.19377e+07	3.2881e+07	3.38165e+07	3.47441e+07	3.56638e+07	36575616	3.74796e+07	3.83756e+07	3.92638e+07	4.01441e+07
12000000	-12000000	-10748972	-9505168	-8268588	-7.03923e+06	-5817100	-4602192	-3.39451e+06	-2.19405e+06	-1.00081e+06	185200	1.36399e+06	2.53555e+06	3.69989e+06	4857008	6.0069e+06	7.14957e+06	8285012	9413232	1.05342e+07	11648000	1.27545e+07	1.38539e+07	1.4946e+07	16030848	1.71085e+07	1.81789e+07	1.92421e+07	2.02981e+07	21346868	2.23884e+07	23422708	2.44498e+07	2.54697e+07	2.64823e+07	27487700	2.84859e+07	2.94769e+07	3.04606e+07	3.14371e+07	32406400	3.33685e+07	3.43233e+07	3.52709e+07	3.62113e+07	37144500	3.80704e+07	3.89892e+07	3.99007e+07
Grand Total	-78000000	-6.30788e+07	-4.84267e+07	-3.40435e+07	-1.99294e+07	-6.08424e+06	7.49188e+06	2.0799e+07	3.38371e+07	4.66062e+07	5.91062e+07	7.13373e+07	8.32994e+07	9.49924e+07	1.06416e+08	1.17571e+08	1.28457e+08	1.39074e+08	1.49422e+08	1.59501e+08	1.69311e+08	1.78852e+08	1.88124e+08	1.97127e+08	2.05861e+08	2.14326e+08	2.22522e+08	2.30449e+08	2.38107e+08	2.45496e+08	2.52615e+08	2.59466e+08	2.66048e+08	2.72361e+08	2.78405e+08	2.84179e+08	2.89685e+08	2.94922e+08	2.9989e+08	3.04589e+08	3.09018e+08	3.13179e+08	3.17071e+08	3.20693e+08	3.24047e+08	3.27132e+08	3.29948e+08	3.32494e+08	3.34772e+08
	0	100000	200000	300000	400000	500000	600000	700000	800000	900000	1000000	1100000	1200000	1300000	1400000	1500000	1600000	1700000	1800000	1900000	2000000	2100000	2200000	2300000	2400000	2500000	2600000	2700000	2800000	2900000	3000000	3100000	3200000	3300000	3400000	3500000	3600000	3700000	3800000	3900000	4000000	4100000	4200000	4300000	4400000	4500000	4600000	4700000	4800000
Row Labels	s0	s100000	s200000	s300000	s400000	s500000	s600000	s700000	s800000	s900000	s1000000	s1100000	s1200000	s1300000	s1400000	s1500000	s1600000	s1700000	s1800000	s1900000	s2000000	s2100000	s2200000	s2300000	s2400000	s2500000	s2600000	s2700000	s2800000	s2900000	s3000000	s3100000	s3200000	s3300000	s3400000	s3500000	s3600000	s3700000	s3800000	s3900000	s4000000	s4100000	s4200000	s4300000	s4400000	s4500000	s4600000	s4700000	s4800000
1000000	-1000000	211296	1.3359e+06	2.37382e+06	3325056	4189600	4.96746e+06	5.65862e+06	6.2631e+06	6.7809e+06	7.212e+06	7.55642e+06	7.81414e+06	7.98518e+06	8.06954e+06	8.0672e+06	7.97818e+06	7.80246e+06	7.54006e+06	7.19098e+06	6.7552e+06	6.23274e+06	5.62358e+06	4.92774e+06	4.14522e+06	3.276e+06	2.3201e+06	1.2775e+06	148224	-1.06774e+06	-2.3704e+06	-3.75974e+06	-5.23578e+06	-6.7985e+06	-8.4479e+06	-1.0184e+07	-1.20068e+07	-1.39163e+07	-1.59124e+07	-1.79953e+07	-2.01648e+07	-2.2421e+07	-2.47639e+07	-2.71935e+07	-2.97098e+07	-3.23128e+07	-3.50025e+07	-3.77788e+07	-4.06419e+07
2000000	-2000000	-767032	422592	1568872	2.67181e+06	3731400	4.74765e+06	5.72055e+06	6650112	7.53633e+06	8379200	9.17873e+06	9.93491e+06	1.06478e+07	1.13172e+07	1.19434e+07	1.25262e+07	1.30657e+07	1.35618e+07	1.40146e+07	1.4424e+07	14790088	1.51128e+07	15392232	1.56283e+07	15821000	1.59704e+07	16076392	1.61391e+07	1.61584e+07	1.61344e+07	1.6067e+07	1.59564e+07	1.58023e+07	1.56049e+07	15364200	1.50801e+07	1.47527e+07	1.4382e+07	1.39678e+07	1.35104e+07	1.30096e+07	1.24655e+07	1.1878e+07	1.12472e+07	1.0573e+07	9.85549e+06	9.09463e+06	8.29043e+06
3000000	-3000000	-1.75981e+06	-548512	633888	1.78739e+06	2912000	4007712	5.07453e+06	6.11245e+06	7.12147e+06	8101600	9.05283e+06	9.97517e+06	1.08686e+07	1.17332e+07	12568800	1.33756e+07	1.41534e+07	1.49024e+07	1.56224e+07	16313600	16975872	17609248	18213728	1.87893e+07	19336000	1.98538e+07	20342688	20802688	2.12338e+07	21636000	2.20093e+07	22353728	22669248	2.29559e+07	2.32136e+07	2.34424e+07	2.36424e+07	2.38134e+07	2.39556e+07	2.40688e+07	2.41532e+07	24208608	2.42352e+07	2.42328e+07	2.42016e+07	2.41415e+07	2.40524e+07	23934528
4000000	-4000000	-2756196	-1534064	-333604	845184	2002300	3137744	4.25152e+06	5.34362e+06	6.41404e+06	7462800	8.48988e+06	9.4953e+06	1.0479e+07	1.14411e+07	12381500	13300224	1.41973e+07	1.50727e+07	1.59264e+07	16758400	1.75688e+07	1.83575e+07	19124476	1.98698e+07	2.05935e+07	2.12955e+07	2.19758e+07	2.26345e+07	2.32715e+07	2.38868e+07	2.44804e+07	2.50524e+07	2.56027e+07	2.61313e+07	26638300	2.71236e+07	2.75872e+07	2.80291e+07	2.84494e+07	2.8848e+07	2.92249e+07	29580176	2.99138e+07	3.02257e+07	30515900	30784464	3.10314e+07	3.12566e+07
5000000	-5000000	-3.75403e+06	-2.5254e+06	-1.3141e+06	-120141	1056480	2.21576e+06	3.35771e+06	4.48232e+06	5.58959e+06	6679520	7.75212e+06	8.80737e+06	9.84529e+06	1.08659e+07	11869120	1.2855e+07	1.38236e+07	1.47748e+07	1.57087e+07	16625280	1.75245e+07	1.84064e+07	1.92709e+07	2.01181e+07	2.0948e+07	2.17605e+07	2.25557e+07	2.33336e+07	2.40941e+07	24837280	2.55631e+07	2.62716e+07	2.69628e+07	2.76366e+07	28293120	2.89323e+07	2.95541e+07	3.01586e+07	3.07457e+07	3.13155e+07	3.1868e+07	3.24031e+07	3.29209e+07	3.34214e+07	33904480	3.43703e+07	3.48187e+07	3.52498e+07
6000000	-6000000	-4752584	-3.51962e+06	-2301096	-1.09702e+06	92600	1.26778e+06	2428504	3.57478e+06	4706616	5824000	6.92694e+06	8015424	9.08946e+06	1.01491e+07	1.11942e+07	1.22249e+07	1.32411e+07	1.42429e+07	1.52303e+07	16203200	1.71617e+07	1.81057e+07	1.90352e+07	1.99503e+07	20851000	2.17372e+07	2.2609e+07	2.34663e+07	2.43092e+07	25137600	2.59516e+07	2.67511e+07	2.75362e+07	2.83068e+07	2.9063e+07	2.98047e+07	3.0532e+07	3.12449e+07	3.19433e+07	32627200	3.32967e+07	33951744	34592344	35218496	35830200	36427456	37010264	3.75786e+07
7000000	-7000000	-5751552	-4.51549e+06	-3.29181e+06	-2.08051e+06	-881600	304928	1479072	2640832	3.79021e+06	4927200	6.05181e+06	7164032	8.26387e+06	9.35133e+06	1.04264e+07	1.14891e+07	1.25394e+07	13577312	1.46028e+07	15616000	1.66168e+07	17605152	18581152	1.95448e+07	2.0496e+07	2.14348e+07	2.23613e+07	2.32754e+07	2.41771e+07	25066400	2.59433e+07	2.68079e+07	2.766e+07	2.84998e+07	2.93272e+07	3.01422e+07	3.09448e+07	3.17351e+07	3.25129e+07	33278400	3.40315e+07	3.47722e+07	3.55005e+07	3.62164e+07	3.692e+07	3.76112e+07	3.829e+07	3.89564e+07
8000000	-8000000	-6750778	-5512392	-4.28484e+06	-3068128	-1862250	-667208	516998	1.69037e+06	2.8529e+06	4004600	5.14546e+06	6275488	7394678	8.50303e+06	9.60055e+06	1.06872e+07	1.17631e+07	1.28281e+07	13882262	14925600	15958102	1.69798e+07	17990598	1.89906e+07	19979750	2.09581e+07	21925558	2.28822e+07	2.3828e+07	24763000	2.56871e+07	26600448	27502918	2.83946e+07	2.92754e+07	3.01453e+07	3.10044e+07	3.18527e+07	3.26902e+07	33516800	3.43326e+07	3.51375e+07	3.59316e+07	3.67149e+07	37487350	38248952	3.89997e+07	3.97396e+07
9000000	-9000000	-7.75018e+06	-6.50998e+06	-5.27942e+06	-4058496	-2847200	-1645536	-453504	728896	1.90166e+06	3064800	4218304	5.36218e+06	6.49642e+06	7.62102e+06	8.736e+06	9.84134e+06	1.09371e+07	1.20231e+07	1.30996e+07	14166400	15223584	1.62711e+07	1.73091e+07	1.83373e+07	1.9356e+07	2.0365e+07	2.13644e+07	22354176	2.33343e+07	24304800	2.52657e+07	26216896	27158496	2.80905e+07	2.90128e+07	29925504	3.08286e+07	31722016	32605824	33480000	3.43445e+07	35199456	3.60447e+07	3.68804e+07	37706400	3.85228e+07	39329536	4.01267e+07
10000000	-10000000	-8.74969e+06	-7.50806e+06	-6.27509e+06	-5.05079e+06	-3835160	-2.6282e+06	-1.42991e+06	-240282	940674	2112960	3.27658e+06	4.43153e+06	5.57781e+06	6.71542e+06	7.84436e+06	8.96463e+06	1.00762e+07	1.11792e+07	1.22734e+07	13359040	1.4436e+07	1.55042e+07	1.65638e+07	1.76147e+07	1.8657e+07	1.96906e+07	2.07155e+07	2.17318e+07	2.27393e+07	23738240	2.47285e+07	2.57101e+07	2.6683e+07	2.76472e+07	2.86028e+07	2.95497e+07	3.04879e+07	3.14174e+07	3.23383e+07	33250560	3.41541e+07	3.5049e+07	3.59352e+07	3.68128e+07	37681640	3.85418e+07	3.93934e+07	4.02363e+07
11000000	-11000000	-9.7493e+06	-8.50648e+06	-7.27154e+06	-6.04449e+06	-4.82531e+06	-3.61401e+06	-2.4106e+06	-1.21506e+06	-27409.5	1.15236e+06	2.32426e+06	3.48827e+06	4.6444e+06	5.79265e+06	6.93302e+06	8.06551e+06	9.19011e+06	1.03068e+07	1.14157e+07	1.25167e+07	1.36097e+07	1.46949e+07	1.57723e+07	1.68417e+07	1.79033e+07	1.8957e+07	2.00028e+07	2.10407e+07	2.20707e+07	2.30929e+07	2.41072e+07	2.51135e+07	2.61121e+07	2.71027e+07	2.80855e+07	2.90603e+07	3.00273e+07	3.09864e+07	3.19377e+07	3.2881e+07	3.38165e+07	3.47441e+07	3.56638e+07	36575616	3.74796e+07	3.83756e+07	3.92638e+07	4.01441e+07
12000000	-12000000	-10748972	-9505168	-8268588	-7.03923e+06	-5817100	-4602192	-3.39451e+06	-2.19405e+06	-1.00081e+06	185200	1.36399e+06	2.53555e+06	3.69989e+06	4857008	6.0069e+06	7.14957e+06	8285012	9413232	1.05342e+07	11648000	1.27545e+07	1.38539e+07	1.4946e+07	16030848	1.71085e+07	1.81789e+07	1.92421e+07	2.02981e+07	21346868	2.23884e+07	23422708	2.44498e+07	2.54697e+07	2.64823e+07	27487700	2.84859e+07	2.94769e+07	3.04606e+07	3.14371e+07	32406400	3.33685e+07	3.43233e+07	3.52709e+07	3.62113e+07	37144500	3.80704e+07	3.89892e+07	3.99007e+07
	500000	1000000	1500000	2000000	2500000	3000000	4000000	5000000
capacity(as cost)	s500000	s1000000	s1500000	s2000000	s2500000	s3000000	s4000000	s5000000
1000000	4189600	7.212e+06	8.0672e+06	6.7552e+06	3.276e+06	-2.3704e+06	-2.01648e+07	-4.6628e+07
2000000	3731400	8379200	1.19434e+07	1.4424e+07	15821000	1.61344e+07	1.35104e+07	6.552e+06
3000000	2912000	8101600	12568800	16313600	19336000	21636000	2.40688e+07	2.3612e+07
4000000	2002300	7462800	12381500	16758400	2.05935e+07	2.38868e+07	2.8848e+07	31642000
5000000	1056480	6679520	11869120	16625280	2.0948e+07	24837280	3.13155e+07	36060000
6000000	92600	5824000	1.11942e+07	16203200	20851000	25137600	32627200	38672000
7000000	-881600	4927200	1.04264e+07	15616000	2.0496e+07	25066400	33278400	40252000
8000000	-1862250	4004600	9.60055e+06	14925600	19979750	24763000	33516800	4.1187e+07
9000000	-2847200	3064800	8.736e+06	14166400	1.9356e+07	24304800	33480000	41692000
10000000	-3835160	2112960	7.84436e+06	13359040	1.8657e+07	23738240	33250560	4.1896e+07
11000000	-4.82531e+06	1.15236e+06	6.93302e+06	1.25167e+07	1.79033e+07	2.30929e+07	3.2881e+07	4.18811e+07
12000000	-5817100	185200	6.0069e+06	11648000	1.71085e+07	2.23884e+07	32406400	41702000
[truncated: 3 more columns]

## Sheet: Sheet1
					Input variable										Input variable
					Juvenile numbers	Density dependent mortality	Adult numbers	Juveniles cost	Feed cost 1	Feed cost 2	Total feed cost	Total feed use	Harvest cost	Farm investment	Capacity	Total costs	Sales	Net earnings
Parameter	Explanation	Value	Reference	Units	0	0	0	0	0	0	0	0	0	1000000	70000	1000000	0	-1000000
fc	Feed cost	1.3	MOWI 2020	€ kg-1	100000	0.024	91600	170000	500136	22932	523068	402360	138499	1000000	70000	1.83157e+06	2.04286e+06	211296
fcr	Feed conversion radio	1.2	MOWI 2020		200000	0.048	178400	340000	974064	58968	1033032	794640	269741	1000000	70000	2.64277e+06	3.97868e+06	1.3359e+06
gwt	Gutted weight fraction	0.84	MOWI 2020		300000	0.072	260400	510000	1.42178e+06	108108	1.52989e+06	1.17684e+06	393725	1000000	70000	3.43362e+06	5.80744e+06	2.37382e+06
h	Harvest weight	4.5	MOWI 2020	kg	400000	0.096	337600	680000	1843296	170352	2013648	1548960	510451	1000000	70000	4.2041e+06	7.52916e+06	3325056
hc	Harvest cost	0.4	MOWI 2020	€ kg-1	500000	0.12	410000	850000	2238600	245700	2484300	1911000	619920	1000000	70000	4954220	9143820	4189600
jp	Juvenile price	1.7	MOWI 2020	€	600000	0.144	477600	1020000	2.6077e+06	334152	2.94185e+06	2.26296e+06	722131	1000000	70000	5.68398e+06	1.06514e+07	4.96746e+06
jw	Juvenile weight	1	MOWI 2020	kg	700000	0.168	540400	1190000	2.95058e+06	435708	3386292	2604840	817085	1000000	70000	6.39338e+06	1.2052e+07	5.65862e+06
					800000	0.192	598400	1360000	3.26726e+06	550368	3817632	2936640	904781	1000000	70000	7.08241e+06	1.33455e+07	6.2631e+06
m1	Density independent mortality	0.06	This study		900000	0.216	651600	1530000	3.55774e+06	678132	4235868	3258360	985219	1000000	70000	7.75109e+06	1.4532e+07	6.7809e+06
m2	Density dependent mortality	0.0168	This study	m3.smolt-1	1000000	0.24	700000	1700000	3822000	819000	4641000	3570000	1058400	1000000	70000	8399400	1.56114e+07	7.212e+06
					1100000	0.264	743600	1870000	4.06006e+06	972972	5033028	3871560	1.12432e+06	1000000	70000	9.02735e+06	1.65838e+07	7.55642e+06
					1200000	0.288	782400	2040000	4271904	1.14005e+06	5411952	4163040	1.18299e+06	1000000	70000	9.63494e+06	1.74491e+07	7.81414e+06
sp	Sales price for gutted fish	5.9	MOWI 2020	€ kg-1	1300000	0.312	816400	2210000	4457544	1.32023e+06	5777772	4444440	1.2344e+06	1000000	70000	1.02222e+07	1.82074e+07	7.98518e+06
-	Fixed cost for fish farm per harvest	3000000	This study	€	1400000	0.336	845600	2380000	4.61698e+06	1.51351e+06	6.13049e+06	4.71576e+06	1.27855e+06	1000000	70000	1.0789e+07	1.88586e+07	8.06954e+06
vc	Rate of change in farm capacity	0.07	This study	m3 €-1	1500000	0.36	870000	2550000	4.7502e+06	1.7199e+06	6.4701e+06	4.977e+06	1.31544e+06	1000000	70000	11335540	1.94027e+07	8.0672e+06
					1600000	0.384	889600	2720000	4.85722e+06	1.93939e+06	6.79661e+06	5.22816e+06	1.34508e+06	1000000	70000	1.18617e+07	1.98399e+07	7.97818e+06
					1700000	0.408	904400	2890000	4.93802e+06	2.17199e+06	7110012	5469240	1.36745e+06	1000000	70000	1.23675e+07	2.01699e+07	7.80246e+06
Variables					1800000	0.432	914400	3060000	4.99262e+06	2.41769e+06	7.41031e+06	5.70024e+06	1.38257e+06	1000000	70000	1.28529e+07	2.03929e+07	7.54006e+06
An	Adult numbers		-		1900000	0.456	919600	3230000	5.02102e+06	2.67649e+06	7.69751e+06	5.92116e+06	1.39044e+06	1000000	70000	1.33179e+07	2.05089e+07	7.19098e+06
Jn	Juvenile numbers		-		2000000	0.48	920000	3400000	5.0232e+06	2.9484e+06	7971600	6132000	1.39104e+06	1000000	70000	13762640	2.05178e+07	6.7552e+06
Tf	Total feed use by farm		-	kg	2100000	0.504	915600	3570000	4.99918e+06	3.23341e+06	8232588	6332760	1.38439e+06	1000000	70000	1.4187e+07	2.04197e+07	6.23274e+06
C	Farm capacity			m3	2200000	0.528	906400	3740000	4.94894e+06	3531528	8480472	6523440	1.37048e+06	1000000	70000	1.45909e+07	2.02145e+07	5.62358e+06
I	Farm investment in capacity			€	2300000	0.552	892400	3910000	4.8725e+06	3.84275e+06	8715252	6704040	1.34931e+06	1000000	70000	1.49746e+07	1.99023e+07	4.92774e+06
					2400000	0.576	873600	4080000	4.76986e+06	4.16707e+06	8936928	6874560	1.32088e+06	1000000	70000	1.53378e+07	1.9483e+07	4.14522e+06
					2500000	0.6	850000	4250000	4.641e+06	4.5045e+06	9145500	7035000	1.2852e+06	1000000	70000	15680700	1.89567e+07	3.276e+06
					2600000	0.624	821600	4420000	4.48594e+06	4.85503e+06	9.34097e+06	7.18536e+06	1.24226e+06	1000000	70000	1.60032e+07	1.83233e+07	2.3201e+06
					2700000	0.648	788400	4590000	4.30466e+06	5.21867e+06	9523332	7325640	1.19206e+06	1000000	70000	1.63054e+07	1.75829e+07	1.2775e+06
					2800000	0.672	750400	4760000	4.09718e+06	5.59541e+06	9692592	7455840	1.1346e+06	1000000	70000	1.65872e+07	1.67354e+07	148224
					2900000	0.696	707600	4930000	3.8635e+06	5.98525e+06	9848748	7575960	1.06989e+06	1000000	70000	1.68486e+07	1.57809e+07	-1.06774e+06
					3000000	0.72	660000	5100000	3.6036e+06	6.3882e+06	9991800	7686000	997920	1000000	70000	17089720	1.47193e+07	-2.3704e+06
					3100000	0.744	607600	5270000	3.3175e+06	6.80425e+06	10121748	7785960	918691	1000000	70000	1.73104e+07	1.35507e+07	-3.75974e+06
					3200000	0.768	550400	5440000	3.00518e+06	7.23341e+06	1.02386e+07	7.87584e+06	832205	1000000	70000	1.75108e+07	1.2275e+07	-5.23578e+06
					3300000	0.792	488400	5610000	2.66666e+06	7.67567e+06	1.03423e+07	7.95564e+06	738461	1000000	70000	1.76908e+07	1.08923e+07	-6.7985e+06
					3400000	0.816	421600	5780000	2.30194e+06	8.13103e+06	10432968	8025360	637459	1000000	70000	1.78504e+07	9.40252e+06	-8.4479e+06
					3500000	0.84	350000	5950000	1.911e+06	8.5995e+06	10510500	8085000	529200	1000000	70000	17989700	7.8057e+06	-1.0184e+07
					3600000	0.864	273600	6120000	1.49386e+06	9.08107e+06	1.05749e+07	8.13456e+06	413683	1000000	70000	1.81086e+07	6.10183e+06	-1.20068e+07
					3700000	0.888	192400	6290000	1.0505e+06	9.57575e+06	1.06263e+07	8.17404e+06	290909	1000000	70000	1.82072e+07	4.2909e+06	-1.39163e+07
					3800000	0.912	106400	6460000	580944	1.00835e+07	1.06645e+07	8.20344e+06	160877	1000000	70000	1.82853e+07	2.37293e+06	-1.59124e+07
					3900000	0.936	15600	6630000	85176	1.06044e+07	1.06896e+07	8.22276e+06	23587.2	1000000	70000	1.83432e+07	347911	-1.79953e+07
					4000000	0.96	-80000	6800000	-436800	1.11384e+07	1.07016e+07	8.232e+06	-120960	1000000	70000	1.83806e+07	-1.78416e+06	-2.01648e+07
					4100000	0.984	-180400	6970000	-984984	1.16855e+07	10700508	8231160	-272765	1000000	70000	1.83977e+07	-4.02328e+06	-2.2421e+07
					4200000	1.008	-285600	7140000	-1.55938e+06	1.22457e+07	1.06863e+07	8.22024e+06	-431827	1000000	70000	1.83945e+07	-6.36945e+06	-2.47639e+07
					4300000	1.032	-395600	7310000	-2.15998e+06	1.2819e+07	1.0659e+07	8.19924e+06	-598147	1000000	70000	1.83709e+07	-8.82267e+06	-2.71935e+07
					4400000	1.056	-510400	7480000	-2.78678e+06	13405392	1.06186e+07	8.16816e+06	-771725	1000000	70000	1.83269e+07	-1.13829e+07	-2.97098e+07
					4500000	1.08	-630000	7650000	-3.4398e+06	1.40049e+07	1.05651e+07	8.127e+06	-952560	1000000	70000	1.82625e+07	-1.40503e+07	-3.23128e+07
					4600000	1.104	-754400	7820000	-4.11902e+06	1.46175e+07	10498488	8075760	-1.14065e+06	1000000	70000	1.81778e+07	-1.68246e+07	-3.50025e+07
					4700000	1.128	-883600	7990000	-4.82446e+06	1.52432e+07	10418772	8014440	-1.336e+06	1000000	70000	1.80728e+07	-1.9706e+07	-3.77788e+07
					4800000	1.152	-1.0176e+06	8160000	-5.5561e+06	1.5882e+07	10325952	7943040	-1.53861e+06	1000000	70000	1.79473e+07	-2.26945e+07	-4.06419e+07
					4900000	1.176	-1.1564e+06	8330000	-6.31394e+06	1.6534e+07	10220028	7861560	-1.74848e+06	1000000	70000	1.78016e+07	-2.579e+07	-4.35916e+07
					5000000	1.2	-1.3e+06	8500000	-7.098e+06	1.7199e+07	1.0101e+07	7.77e+06	-1.9656e+06	1000000	70000	1.76354e+07	-2.89926e+07	-4.6628e+07
					0	0	0	0	0	0	0	0	0	2000000	140000	2000000	0	-2000000
					100000	0.012	92800	170000	506688	19656	526344	404880	140314	2000000	140000	2.83666e+06	2.06963e+06	-767032
					200000	0.024	183200	340000	1.00027e+06	45864	1046136	804720	276998	2000000	140000	3.66313e+06	4.08573e+06	422592
					300000	0.036	271200	510000	1480752	78624	1559376	1199520	410054	2000000	140000	4.47943e+06	6.0483e+06	1568872
					400000	0.048	356800	680000	1.94813e+06	117936	2066064	1589280	539482	2000000	140000	5.28555e+06	7.95735e+06	2.67181e+06
					500000	0.06	440000	850000	2402400	163800	2566200	1974000	665280	2000000	140000	6081480	9812880	3731400
					600000	0.072	520800	1020000	2.84357e+06	216216	3.05978e+06	2.35368e+06	787450	2000000	140000	6.86723e+06	1.16149e+07	4.74765e+06
					700000	0.084	599200	1190000	3.27163e+06	275184	3546816	2728320	905990	2000000	140000	7.64281e+06	1.33634e+07	5.72055e+06
					800000	0.096	675200	1360000	3686592	340704	4027296	3097920	1.0209e+06	2000000	140000	8.4082e+06	1.50583e+07	6650112
					900000	0.108	748800	1530000	4088448	412776	4501224	3462480	1.13219e+06	2000000	140000	9.16341e+06	1.66997e+07	7.53633e+06
					1000000	0.12	820000	1700000	4477200	491400	4968600	3822000	1239840	2000000	140000	9908440	18287640	8379200
					1100000	0.132	888800	1870000	4852848	576576	5429424	4176480	1.34387e+06	2000000	140000	1.06433e+07	1.9822e+07	9.17873e+06
					1200000	0.144	955200	2040000	5.21539e+06	668304	5.8837e+06	4.52592e+06	1.44426e+06	2000000	140000	1.1368e+07	2.13029e+07	9.93491e+06
					1300000	0.156	1.0192e+06	2210000	5.56483e+06	766584	6.33142e+06	4.87032e+06	1.54103e+06	2000000	140000	1.20824e+07	2.27302e+07	1.06478e+07
					1400000	0.168	1.0808e+06	2380000	5.90117e+06	871416	6772584	5209680	1.63417e+06	2000000	140000	1.27868e+07	2.4104e+07	1.13172e+07
					1500000	0.18	1.14e+06	2550000	6.2244e+06	982800	7207200	5544000	1.72368e+06	2000000	140000	13480880	2.54243e+07	1.19434e+07
					1600000	0.192	1.1968e+06	2720000	6.53453e+06	1.10074e+06	7635264	5873280	1.80956e+06	2000000	140000	1.41648e+07	2.6691e+07	1.25262e+07
					1700000	0.204	1251200	2890000	6831552	1225224	8056776	6197520	1.89181e+06	2000000	140000	1.48386e+07	2.79043e+07	1.30657e+07
					1800000	0.216	1.3032e+06	3060000	7.11547e+06	1.35626e+06	8471736	6516720	1.97044e+06	2000000	140000	1.55022e+07	2.9064e+07	1.35618e+07
					1900000	0.228	1352800	3230000	7386288	1493856	8880144	6830880	2.04543e+06	2000000	140000	1.61556e+07	3.01701e+07	1.40146e+07
					2000000	0.24	1400000	3400000	7644000	1638000	9282000	7140000	2116800	2000000	140000	16798800	3.12228e+07	1.4424e+07
					2100000	0.252	1444800	3570000	7888608	1788696	9677304	7444080	2.18454e+06	2000000	140000	1.74318e+07	3.22219e+07	14790088
					2200000	0.264	1.4872e+06	3740000	8.12011e+06	1.94594e+06	10066056	7743120	2.24865e+06	2000000	140000	1.80547e+07	3.31675e+07	1.51128e+07
					2300000	0.276	1.5272e+06	3910000	8.33851e+06	2.10974e+06	10448256	8037120	2.30913e+06	2000000	140000	1.86674e+07	3.40596e+07	15392232
					2400000	0.288	1.5648e+06	4080000	8543808	2.2801e+06	10823904	8326080	2.36598e+06	2000000	140000	1.92699e+07	3.48982e+07	1.56283e+07
					2500000	0.3	1.6e+06	4250000	8736000	2.457e+06	11193000	8610000	2419200	2000000	140000	19862200	35683200	15821000
					2600000	0.312	1.6328e+06	4420000	8915088	2.64046e+06	11555544	8888880	2.46879e+06	2000000	140000	2.04443e+07	3.64147e+07	1.59704e+07
					2700000	0.324	1.6632e+06	4590000	9081072	2.83046e+06	11911536	9162720	2.51476e+06	2000000	140000	2.10163e+07	3.70927e+07	16076392
					2800000	0.336	1.6912e+06	4760000	9.23395e+06	3.02702e+06	1.2261e+07	9.43152e+06	2.55709e+06	2000000	140000	2.15781e+07	3.77171e+07	1.61391e+07
					2900000	0.348	1.7168e+06	4930000	9.37373e+06	3.23014e+06	1.26039e+07	9.69528e+06	2.5958e+06	2000000	140000	2.21297e+07	3.82881e+07	1.61584e+07
					3000000	0.36	1.74e+06	5100000	9.5004e+06	3.4398e+06	1.29402e+07	9.954e+06	2.63088e+06	2000000	140000	22671080	3.88055e+07	1.61344e+07
					3100000	0.372	1.7608e+06	5270000	9.61397e+06	3.65602e+06	1.327e+07	1.02077e+07	2.66233e+06	2000000	140000	2.32023e+07	3.92694e+07	1.6067e+07
					3200000	0.384	1.7792e+06	5440000	9.71443e+06	3.87878e+06	1.35932e+07	1.04563e+07	2.69015e+06	2000000	140000	2.37234e+07	3.96797e+07	1.59564e+07
					3300000	0.396	1.7952e+06	5610000	9.80179e+06	4.1081e+06	1.39099e+07	1.06999e+07	2.71434e+06	2000000	140000	2.42342e+07	4.00366e+07	1.58023e+07
					3400000	0.408	1.8088e+06	5780000	9.87605e+06	4.34398e+06	14220024	10938480	2.73491e+06	2000000	140000	2.47349e+07	4.03399e+07	1.56049e+07
					3500000	0.42	1.82e+06	5950000	9.9372e+06	4.5864e+06	14523600	11172000	2751840	2000000	140000	25225440	40589640	15364200
					3600000	0.432	1.8288e+06	6120000	9.98525e+06	4.83538e+06	1.48206e+07	1.14005e+07	2.76515e+06	2000000	140000	2.57058e+07	4.07859e+07	1.50801e+07
					3700000	0.444	1.8352e+06	6290000	1.00202e+07	5.0909e+06	1.51111e+07	1.16239e+07	2.77482e+06	2000000	140000	2.61759e+07	4.09286e+07	1.47527e+07
					3800000	0.456	1.8392e+06	6460000	1.0042e+07	5.35298e+06	1.5395e+07	1.18423e+07	2.78087e+06	2000000	140000	2.66359e+07	4.10178e+07	1.4382e+07
					3900000	0.468	1.8408e+06	6630000	1.00508e+07	5.62162e+06	1.56724e+07	1.20557e+07	2.78329e+06	2000000	140000	2.70857e+07	4.10535e+07	1.39678e+07
					4000000	0.48	1.84e+06	6800000	1.00464e+07	5.8968e+06	15943200	12264000	2.78208e+06	2000000	140000	27525280	4.10357e+07	1.35104e+07
					4100000	0.492	1.8368e+06	6970000	1.00289e+07	6.17854e+06	1.62075e+07	1.24673e+07	2.77724e+06	2000000	140000	2.79547e+07	4.09643e+07	1.30096e+07
					4200000	0.504	1.8312e+06	7140000	9.99835e+06	6.46682e+06	16465176	12665520	2.76877e+06	2000000	140000	2.8374e+07	4.08394e+07	1.24655e+07
					4300000	0.516	1.8232e+06	7310000	9.95467e+06	6.76166e+06	16716336	12858720	2.75668e+06	2000000	140000	2.8783e+07	4.0661e+07	1.1878e+07
					4400000	0.528	1.8128e+06	7480000	9.89789e+06	7063056	16960944	13046880	2.74095e+06	2000000	140000	2.91819e+07	4.04291e+07	1.12472e+07
					4500000	0.54	1.8e+06	7650000	9.828e+06	7.371e+06	1.7199e+07	1.323e+07	2.7216e+06	2000000	140000	2.95706e+07	4.01436e+07	1.0573e+07
					4600000	0.552	1.7848e+06	7820000	9.74501e+06	7.6855e+06	17430504	13408080	2.69862e+06	2000000	140000	2.99491e+07	3.98046e+07	9.85549e+06
					4700000	0.564	1.7672e+06	7990000	9.64891e+06	8.00654e+06	17655456	13581120	2.67201e+06	2000000	140000	3.03175e+07	3.94121e+07	9.09463e+06
					4800000	0.576	1.7472e+06	8160000	9.53971e+06	8.33414e+06	17873856	13749120	2.64177e+06	2000000	140000	3.06756e+07	3.89661e+07	8.29043e+06
					4900000	0.588	1.7248e+06	8330000	9.41741e+06	8.6683e+06	18085704	13912080	2.6079e+06	2000000	140000	3.10236e+07	3.84665e+07	7.44289e+06
					5000000	0.6	1.7e+06	8500000	9.282e+06	9.009e+06	18291000	14070000	2.5704e+06	2000000	140000	31361400	3.79134e+07	6.552e+06
					0	0	0	0	0	0	0	0	0	3000000	210000	3000000	0	-3000000
					100000	0.008	93200	170000	508872	18564	527436	405720	140918	3000000	210000	3.83835e+06	2.07855e+06	-1.75981e+06
					200000	0.016	184800	340000	1009008	41496	1050504	808080	279418	3000000	210000	4.66992e+06	4.12141e+06	-548512
					300000	0.024	274800	510000	1500408	68796	1569204	1207080	415498	3000000	210000	5.4947e+06	6.12859e+06	633888
					400000	0.032	363200	680000	1.98307e+06	100464	2083536	1602720	549158	3000000	210000	6.31269e+06	8.10009e+06	1.78739e+06
					500000	0.04	450000	850000	2.457e+06	136500	2.5935e+06	1.995e+06	680400	3000000	210000	7123900	10035900	2912000
					600000	0.048	535200	1020000	2922192	176904	3099096	2383920	809222	3000000	210000	7.92832e+06	1.1936e+07	4007712
					700000	0.056	618800	1190000	3.37865e+06	221676	3600324	2769480	935626	3000000	210000	8.72595e+06	1.38005e+07	5.07453e+06
					800000	0.064	700800	1360000	3.82637e+06	270816	4097184	3151680	1.05961e+06	3000000	210000	9.51679e+06	1.56292e+07	6.11245e+06
					900000	0.072	781200	1530000	4265352	324324	4589676	3530520	1.18117e+06	3000000	210000	1.03009e+07	1.74223e+07	7.12147e+06
					1000000	0.08	860000	1700000	4695600	382200	5077800	3906000	1300320	3000000	210000	11078120	19179720	8101600
					1100000	0.088	937200	1870000	5117112	444444	5561556	4278120	1.41705e+06	3000000	210000	1.18486e+07	2.09014e+07	9.05283e+06
					1200000	0.096	1012800	2040000	5529888	511056	6040944	4646880	1.53135e+06	3000000	210000	1.26123e+07	2.25875e+07	9.97517e+06
					1300000	0.104	1086800	2210000	5933928	582036	6515964	5012280	1.64324e+06	3000000	210000	1.33692e+07	2.42378e+07	1.08686e+07
					1400000	0.112	1159200	2380000	6329232	657384	6986616	5374320	1.75271e+06	3000000	210000	1.41193e+07	2.58525e+07	1.17332e+07
					1500000	0.12	1230000	2550000	6715800	737100	7452900	5733000	1859760	3000000	210000	14862660	27431460	12568800
					1600000	0.128	1299200	2720000	7093632	821184	7914816	6088320	1.96439e+06	3000000	210000	1.55992e+07	2.89748e+07	1.33756e+07
					1700000	0.136	1366800	2890000	7462728	909636	8372364	6440280	2.0666e+06	3000000	210000	1.6329e+07	3.04824e+07	1.41534e+07
					1800000	0.144	1.4328e+06	3060000	7.82309e+06	1.00246e+06	8825544	6788880	2.16639e+06	3000000	210000	1.70519e+07	3.19543e+07	1.49024e+07
					1900000	0.152	1.4972e+06	3230000	8.17471e+06	1.09964e+06	9274356	7134120	2.26377e+06	3000000	210000	1.77681e+07	3.33906e+07	1.56224e+07
					2000000	0.16	1.56e+06	3400000	8517600	1.2012e+06	9718800	7476000	2358720	3000000	210000	18477520	34791120	16313600
					2100000	0.168	1621200	3570000	8851752	1307124	10158876	7814520	2.45125e+06	3000000	210000	1.91801e+07	3.6156e+07	16975872
					2200000	0.176	1680800	3740000	9177168	1417416	10594584	8149680	2.54137e+06	3000000	210000	1.9876e+07	3.74852e+07	17609248
					2300000	0.184	1738800	3910000	9493848	1532076	11025924	8481480	2.62907e+06	3000000	210000	2.0565e+07	3.87787e+07	18213728
					2400000	0.192	1795200	4080000	9801792	1651104	11452896	8809920	2.71434e+06	3000000	210000	2.12472e+07	4.00366e+07	1.87893e+07
					2500000	0.2	1850000	4250000	10101000	1774500	11875500	9135000	2797200	3000000	210000	21922700	41258700	19336000
					2600000	0.208	1903200	4420000	10391472	1902264	12293736	9456720	2.87764e+06	3000000	210000	2.25914e+07	4.24452e+07	1.98538e+07
					2700000	0.216	1954800	4590000	10673208	2034396	12707604	9775080	2.95566e+06	3000000	210000	2.32533e+07	4.35959e+07	20342688
					2800000	0.224	2004800	4760000	10946208	2170896	13117104	10090080	3.03126e+06	3000000	210000	2.39084e+07	4.4711e+07	20802688
					2900000	0.232	2053200	4930000	11210472	2311764	13522236	10401720	3.10444e+06	3000000	210000	2.45567e+07	4.57905e+07	2.12338e+07
					3000000	0.24	2100000	5100000	11466000	2457000	13923000	10710000	3175200	3000000	210000	25198200	46834200	21636000
					3100000	0.248	2145200	5270000	11712792	2606604	14319396	11014920	3.24354e+06	3000000	210000	2.58329e+07	4.78423e+07	2.20093e+07
					3200000	0.256	2188800	5440000	11950848	2760576	14711424	11316480	3.30947e+06	3000000	210000	2.64609e+07	4.88146e+07	22353728
					3300000	0.264	2230800	5610000	12180168	2918916	15099084	11614680	3.37297e+06	3000000	210000	2.70821e+07	4.97513e+07	22669248
					3400000	0.272	2.2712e+06	5780000	1.24008e+07	3.08162e+06	15482376	11909520	3.43405e+06	3000000	210000	2.76964e+07	5.06523e+07	2.29559e+07
					3500000	0.28	2.31e+06	5950000	1.26126e+07	3.2487e+06	15861300	12201000	3.49272e+06	3000000	210000	28304020	5.15176e+07	2.32136e+07
					3600000	0.288	2.3472e+06	6120000	1.28157e+07	3.42014e+06	16235856	12489120	3.54897e+06	3000000	210000	2.89048e+07	5.23473e+07	2.34424e+07
					3700000	0.296	2.3828e+06	6290000	1.30101e+07	3.59596e+06	16606044	12773880	3.60279e+06	3000000	210000	2.94988e+07	5.31412e+07	2.36424e+07
					3800000	0.304	2.4168e+06	6460000	1.31957e+07	3.77614e+06	16971864	13055280	3.6542e+06	3000000	210000	3.00861e+07	5.38995e+07	2.38134e+07
					3900000	0.312	2.4492e+06	6630000	1.33726e+07	3.96068e+06	17333316	13333320	3.70319e+06	3000000	210000	3.06665e+07	5.46221e+07	2.39556e+07
					4000000	0.32	2.48e+06	6800000	1.35408e+07	4.1496e+06	17690400	13608000	3.74976e+06	3000000	210000	31240160	5.5309e+07	2.40688e+07
					4100000	0.328	2.5092e+06	6970000	1.37002e+07	4.34288e+06	18043116	13879320	3.79391e+06	3000000	210000	3.1807e+07	5.59602e+07	2.41532e+07
					4200000	0.336	2536800	7140000	13850928	4540536	18391464	14147280	3.83564e+06	3000000	210000	3.23671e+07	5.65757e+07	24208608
					4300000	0.344	2.5628e+06	7310000	1.39929e+07	4.74256e+06	18735444	14411880	3.87495e+06	3000000	210000	3.29204e+07	5.71556e+07	2.42352e+07
					4400000	0.352	2587200	7480000	14126112	4948944	19075056	14673120	3.91185e+06	3000000	210000	3.34669e+07	5.76997e+07	2.42328e+07
					4500000	0.36	2.61e+06	7650000	1.42506e+07	5.1597e+06	19410300	14931000	3.94632e+06	3000000	210000	34006620	5.82082e+07	2.42016e+07
					4600000	0.368	2631200	7820000	14366352	5374824	19741176	15185520	3.97837e+06	3000000	210000	3.45396e+07	5.8681e+07	2.41415e+07
					4700000	0.376	2.6508e+06	7990000	1.44734e+07	5.59432e+06	2.00677e+07	1.54367e+07	4.00801e+06	3000000	210000	3.50657e+07	5.91181e+07	2.40524e+07
					4800000	0.384	2.6688e+06	8160000	1.45716e+07	5.81818e+06	20389824	15684480	4.03523e+06	3000000	210000	3.5585e+07	5.95196e+07	23934528
					4900000	0.392	2685200	8330000	14661192	6046404	20707596	15928920	4.06002e+06	3000000	210000	3.60976e+07	5.98853e+07	2.37877e+07
					5000000	0.4	2.7e+06	8500000	1.4742e+07	6.279e+06	21021000	16170000	4.0824e+06	3000000	210000	36603400	6.02154e+07	2.3612e+07
					0	0	0	0	0	0	0	0	0	4000000	280000	4000000	0	-4000000
					100000	0.006	93400	170000	509964	18018	527982	406140	141221	4000000	280000	4.8392e+06	2.08301e+06	-2756196
					200000	0.012	185600	340000	1013376	39312	1052688	809760	280627	4000000	280000	5.67332e+06	4.13925e+06	-1534064
					300000	0.018	276600	510000	1510236	63882	1574118	1210860	418219	4000000	280000	6.50234e+06	6.16873e+06	-333604
					400000	0.024	366400	680000	2.00054e+06	91728	2092272	1609440	553997	4000000	280000	7.32627e+06	8.17145e+06	845184
					500000	0.03	455000	850000	2.4843e+06	122850	2.60715e+06	2.0055e+06	687960	4000000	280000	8145110	10147410	2002300
					600000	0.036	542400	1020000	2961504	157248	3118752	2399040	820109	4000000	280000	8.95886e+06	1.20966e+07	3137744
					700000	0.042	628600	1190000	3.43216e+06	194922	3627078	2790060	950443	4000000	280000	9.76752e+06	1.4019e+07	4.25152e+06
					800000	0.048	713600	1360000	3.89626e+06	235872	4132128	3178560	1.07896e+06	4000000	280000	1.05711e+07	1.59147e+07	5.34362e+06
					900000	0.054	797400	1530000	4353804	280098	4633902	3564540	1.20567e+06	4000000	280000	1.13696e+07	1.77836e+07	6.41404e+06
					1000000	0.06	880000	1700000	4804800	327600	5132400	3948000	1330560	4000000	280000	12162960	19625760	7462800
					1100000	0.066	961400	1870000	5.24924e+06	378378	5.62762e+06	4.32894e+06	1.45364e+06	4000000	280000	1.29513e+07	2.14411e+07	8.48988e+06
					1200000	0.072	1.0416e+06	2040000	5.68714e+06	432432	6.11957e+06	4.70736e+06	1.5749e+06	4000000	280000	1.37345e+07	2.32298e+07	9.4953e+06
					1300000	0.078	1.1206e+06	2210000	6.11848e+06	489762	6608238	5083260	1.69435e+06	4000000	280000	1.45126e+07	2.49916e+07	1.0479e+07
					1400000	0.084	1.1984e+06	2380000	6.54326e+06	550368	7093632	5456640	1.81198e+06	4000000	280000	1.52856e+07	2.67267e+07	1.14411e+07
					1500000	0.09	1275000	2550000	6961500	614250	7575750	5827500	1927800	4000000	280000	16053550	28435050	12381500
					1600000	0.096	1350400	2720000	7373184	681408	8054592	6195840	2.0418e+06	4000000	280000	1.68164e+07	3.01166e+07	13300224
					1700000	0.102	1424600	2890000	7778316	751842	8530158	6561660	2.154e+06	4000000	280000	1.75742e+07	3.17714e+07	1.41973e+07
					1800000	0.108	1497600	3060000	8176896	825552	9002448	6924960	2.26437e+06	4000000	280000	1.83268e+07	3.33995e+07	1.50727e+07
					1900000	0.114	1569400	3230000	8568924	902538	9471462	7285740	2.37293e+06	4000000	280000	1.90744e+07	3.50008e+07	1.59264e+07
					2000000	0.12	1640000	3400000	8954400	982800	9937200	7644000	2479680	4000000	280000	19816880	36575280	16758400
					2100000	0.126	1709400	3570000	9333324	1066338	10399662	7999740	2.58461e+06	4000000	280000	2.05543e+07	3.8123e+07	1.75688e+07
					2200000	0.132	1.7776e+06	3740000	9705696	1.15315e+06	10858848	8352960	2.68773e+06	4000000	280000	2.12866e+07	3.9644e+07	1.83575e+07
					2300000	0.138	1.8446e+06	3910000	1.00715e+07	1.24324e+06	1.13148e+07	8.70366e+06	2.78904e+06	4000000	280000	2.20138e+07	4.11383e+07	19124476
					2400000	0.144	1.9104e+06	4080000	1.04308e+07	1.33661e+06	1.17674e+07	9.05184e+06	2.88852e+06	4000000	280000	2.27359e+07	4.26057e+07	1.98698e+07
					2500000	0.15	1.975e+06	4250000	1.07835e+07	1.43325e+06	1.22167e+07	9.3975e+06	2.9862e+06	4000000	280000	23452950	4.40464e+07	2.05935e+07
					2600000	0.156	2.0384e+06	4420000	1.11297e+07	1.53317e+06	1.26628e+07	9.74064e+06	3.08206e+06	4000000	280000	2.41649e+07	4.54604e+07	2.12955e+07
					2700000	0.162	2100600	4590000	11469276	1636362	13105638	10081260	3.17611e+06	4000000	280000	2.48717e+07	4.68476e+07	2.19758e+07
					2800000	0.168	2.1616e+06	4760000	1.18023e+07	1.74283e+06	13545168	10419360	3.26834e+06	4000000	280000	2.55735e+07	4.8208e+07	2.26345e+07
					2900000	0.174	2.2214e+06	4930000	1.21288e+07	1.85258e+06	13981422	10754940	3.35876e+06	4000000	280000	2.62702e+07	4.95417e+07	2.32715e+07
					3000000	0.18	2.28e+06	5100000	1.24488e+07	1.9656e+06	14414400	11088000	3.44736e+06	4000000	280000	26961760	5.08486e+07	2.38868e+07
					3100000	0.186	2.3374e+06	5270000	1.27622e+07	2.0819e+06	14844102	11418540	3.53415e+06	4000000	280000	2.76483e+07	5.21287e+07	2.44804e+07
					3200000	0.192	2.3936e+06	5440000	1.30691e+07	2.20147e+06	15270528	11746560	3.61912e+06	4000000	280000	2.83297e+07	5.33821e+07	2.50524e+07
					3300000	0.198	2.4486e+06	5610000	1.33694e+07	2.32432e+06	15693678	12072060	3.70228e+06	4000000	280000	2.9006e+07	5.46087e+07	2.56027e+07
					3400000	0.204	2502400	5780000	13663104	2450448	16113552	12395040	3.78363e+06	4000000	280000	2.96772e+07	5.58085e+07	2.61313e+07
					3500000	0.21	2555000	5950000	13950300	2579850	16530150	12715500	3863160	4000000	280000	30343310	56981610	26638300
					3600000	0.216	2.6064e+06	6120000	1.42309e+07	2.71253e+06	16943472	13033440	3.94088e+06	4000000	280000	3.10043e+07	5.81279e+07	2.71236e+07
					3700000	0.222	2656600	6290000	14505036	2848482	17353518	13348860	4.01678e+06	4000000	280000	3.16603e+07	5.92475e+07	2.75872e+07
					3800000	0.228	2705600	6460000	14772576	2987712	17760288	13661760	4.09087e+06	4000000	280000	3.23112e+07	6.03403e+07	2.80291e+07
					3900000	0.234	2753400	6630000	15033564	3130218	18163782	13972140	4.16314e+06	4000000	280000	3.29569e+07	6.14063e+07	2.84494e+07
					4000000	0.24	2800000	6800000	15288000	3276000	18564000	14280000	4233600	4000000	280000	33597600	6.24456e+07	2.8848e+07
					4100000	0.246	2845400	6970000	15535884	3425058	18960942	14585340	4.30224e+06	4000000	280000	3.42332e+07	6.34581e+07	2.92249e+07
					4200000	0.252	2889600	7140000	15777216	3577392	19354608	14888160	4.36908e+06	4000000	280000	3.48637e+07	6.44439e+07	29580176
					4300000	0.258	2.9326e+06	7310000	1.6012e+07	3.733e+06	19744998	15188460	4.43409e+06	4000000	280000	3.54891e+07	6.54028e+07	2.99138e+07
					4400000	0.264	2.9744e+06	7480000	1.62402e+07	3.89189e+06	20132112	15486240	4.49729e+06	4000000	280000	3.61094e+07	6.63351e+07	3.02257e+07
					4500000	0.27	3.015e+06	7650000	1.64619e+07	4.05405e+06	20515950	15781500	4558680	4000000	280000	36724630	67240530	30515900
					4600000	0.276	3.0544e+06	7820000	1.6677e+07	4.21949e+06	20896512	16074240	4.61825e+06	4000000	280000	3.73348e+07	6.81192e+07	30784464
					4700000	0.282	3.0926e+06	7990000	16885596	4.3882e+06	21273798	16364460	4.67601e+06	4000000	280000	3.79398e+07	6.89712e+07	3.10314e+07
					4800000	0.288	3.1296e+06	8160000	17087616	4.56019e+06	21647808	16652160	4.73196e+06	4000000	280000	3.85398e+07	6.97963e+07	3.12566e+07
					4900000	0.294	3.1654e+06	8330000	17283084	4.73546e+06	22018542	16937340	4.78608e+06	4000000	280000	3.91346e+07	7.05948e+07	31460124
					5000000	0.3	3.2e+06	8500000	17472000	4.914e+06	22386000	17220000	4838400	4000000	280000	39724400	71366400	31642000
					0	0	0	0	0	0	0	0	0	5000000	350000	5000000	0	-5000000
					100000	0.0048	93520	170000	510619	17690.4	528310	406392	141402	5000000	350000	5.83971e+06	2.08568e+06	-3.75403e+06
					200000	0.0096	186080	340000	1.016e+06	38001.6	1.054e+06	810768	281353	5000000	350000	6.67535e+06	4.14996e+06	-2.5254e+06
					300000	0.0144	277680	510000	1.51613e+06	60933.6	1.57707e+06	1213128	419852	5000000	350000	7.50692e+06	6.19282e+06	-1.3141e+06
					400000	0.0192	368320	680000	2.01103e+06	86486.4	2.09751e+06	1613472	556900	5000000	350000	8.33441e+06	8.21427e+06	-120141
					500000	0.024	458000	850000	2.50068e+06	114660	2.61534e+06	2.0118e+06	692496	5000000	350000	9157836	10214316	1056480
					600000	0.0288	546720	1020000	2.98509e+06	145454	3.13055e+06	2408112	826641	5000000	350000	9.97719e+06	1.21929e+07	2.21576e+06
					700000	0.0336	634480	1190000	3.46426e+06	178870	3.64313e+06	2802408	959334	5000000	350000	1.07925e+07	1.41502e+07	3.35771e+06
					800000	0.0384	721280	1360000	3.93819e+06	214906	4.15309e+06	3194688	1.09058e+06	5000000	350000	1.16037e+07	1.6086e+07	4.48232e+06
					900000	0.0432	807120	1530000	4.40688e+06	253562	4.66044e+06	3.58495e+06	1.22037e+06	5000000	350000	1.24108e+07	1.80004e+07	5.58959e+06
					1000000	0.048	892000	1700000	4870320	294840	5165160	3973200	1348704	5000000	350000	13213864	19893384	6679520
					1100000	0.0528	975920	1870000	5.32852e+06	338738	5.66726e+06	4359432	1.47559e+06	5000000	350000	1.40129e+07	2.1765e+07	7.75212e+06
					1200000	0.0576	1058880	2040000	5.78148e+06	385258	6.16674e+06	4.74365e+06	1.60103e+06	5000000	350000	1.48078e+07	2.36151e+07	8.80737e+06
					1300000	0.0624	1140880	2210000	6.2292e+06	434398	6.6636e+06	5.12585e+06	1.72501e+06	5000000	350000	1.55986e+07	2.54439e+07	9.84529e+06
					1400000	0.0672	1.22192e+06	2380000	6.67168e+06	486158	7.15784e+06	5.50603e+06	1.84754e+06	5000000	350000	1.63854e+07	2.72513e+07	1.08659e+07
					1500000	0.072	1302000	2550000	7108920	540540	7649460	5884200	1968624	5000000	350000	17168084	29037204	11869120
					1600000	0.0768	1381120	2720000	7.54092e+06	597542	8.13846e+06	6260352	2.08825e+06	5000000	350000	1.79467e+07	3.08017e+07	1.2855e+07
					1700000	0.0816	1459280	2890000	7.96767e+06	657166	8.62483e+06	6634488	2.20643e+06	5000000	350000	1.87213e+07	3.25449e+07	1.38236e+07
					1800000	0.0864	1.53648e+06	3060000	8.38918e+06	719410	9.10859e+06	7006608	2.32316e+06	5000000	350000	1.94917e+07	3.42666e+07	1.47748e+07
					1900000	0.0912	1612720	3230000	8.80545e+06	784274	9.58973e+06	7.37671e+06	2.43843e+06	5000000	350000	2.02582e+07	3.59669e+07	1.57087e+07
					2000000	0.096	1688000	3400000	9216480	851760	10068240	7744800	2552256	5000000	350000	21020496	37645776	16625280
					2100000	0.1008	1762320	3570000	9.62227e+06	921866	1.05441e+07	8.11087e+06	2.66463e+06	5000000	350000	2.17788e+07	3.93033e+07	1.75245e+07
					2200000	0.1056	1.83568e+06	3740000	1.00228e+07	994594	1.10174e+07	8.47493e+06	2.77555e+06	5000000	350000	2.2533e+07	4.09393e+07	1.84064e+07
					2300000	0.1104	1.90808e+06	3910000	1.04181e+07	1.06994e+06	1.14881e+07	8.83697e+06	2.88502e+06	5000000	350000	2.32831e+07	4.2554e+07	1.92709e+07
					2400000	0.1152	1979520	4080000	1.08082e+07	1.14791e+06	1.19561e+07	9196992	2.99303e+06	5000000	350000	2.40291e+07	4.41473e+07	2.01181e+07
					2500000	0.12	2.05e+06	4250000	1.1193e+07	1.2285e+06	1.24215e+07	9.555e+06	3.0996e+06	5000000	350000	24771100	4.57191e+07	2.0948e+07
					2600000	0.1248	2119520	4420000	1.15726e+07	1.31171e+06	1.28843e+07	9910992	3.20471e+06	5000000	350000	2.5509e+07	4.72695e+07	2.17605e+07
					2700000	0.1296	2188080	4590000	1.19469e+07	1.39754e+06	1.33445e+07	10264968	3.30838e+06	5000000	350000	2.62428e+07	4.87986e+07	2.25557e+07
					2800000	0.1344	2255680	4760000	1.2316e+07	1.48599e+06	1.3802e+07	10616928	3.41059e+06	5000000	350000	2.69726e+07	5.03062e+07	2.33336e+07
					2900000	0.1392	2322320	4930000	1.26799e+07	1.57707e+06	1.42569e+07	10966872	3.51135e+06	5000000	350000	2.76983e+07	5.17924e+07	2.40941e+07
					3000000	0.144	2388000	5100000	13038480	1670760	14709240	11314800	3610656	5000000	350000	28419896	53257176	24837280
					3100000	0.1488	2.45272e+06	5270000	1.33919e+07	1.76707e+06	1.51589e+07	11660712	3.70851e+06	5000000	350000	2.91374e+07	5.47006e+07	2.55631e+07
					3200000	0.1536	2516480	5440000	1.374e+07	1.86601e+06	1.5606e+07	12004608	3.80492e+06	5000000	350000	2.98509e+07	5.61225e+07	2.62716e+07
					3300000	0.1584	2579280	5610000	1.40829e+07	1.96757e+06	1.60504e+07	12346488	3.89987e+06	5000000	350000	3.05603e+07	5.75231e+07	2.69628e+07
					3400000	0.1632	2641120	5780000	1.44205e+07	2.07174e+06	1.64923e+07	12686352	3.99337e+06	5000000	350000	3.12656e+07	5.89023e+07	2.76366e+07
					3500000	0.168	2702000	5950000	14752920	2178540	16931460	13024200	4085424	5000000	350000	31966884	60260004	28293120
					3600000	0.1728	2.76192e+06	6120000	1.50801e+07	2.28796e+06	1.7368e+07	1.336e+07	4.17602e+06	5000000	350000	3.26641e+07	6.15963e+07	2.89323e+07
					3700000	0.1776	2820880	6290000	1.5402e+07	2.4e+06	1.7802e+07	1.36938e+07	4.26517e+06	5000000	350000	3.33572e+07	6.29113e+07	2.95541e+07
					3800000	0.1824	2878880	6460000	1.57187e+07	2.51466e+06	1.82333e+07	1.40256e+07	4.35287e+06	5000000	350000	3.40462e+07	6.42048e+07	3.01586e+07
					3900000	0.1872	2.93592e+06	6630000	1.60301e+07	2.63194e+06	1.86621e+07	1.43554e+07	4.43911e+06	5000000	350000	3.47312e+07	6.54769e+07	3.07457e+07
					4000000	0.192	2992000	6800000	16336320	2751840	19088160	14683200	4523904	5000000	350000	35412064	6.67276e+07	3.13155e+07
					4100000	0.1968	3047120	6970000	1.66373e+07	2.87436e+06	1.95116e+07	15008952	4.60725e+06	5000000	350000	3.60889e+07	6.79569e+07	3.1868e+07
					4200000	0.2016	3101280	7140000	1.6933e+07	2.99951e+06	1.99325e+07	1.53327e+07	4.68914e+06	5000000	350000	3.67616e+07	6.91647e+07	3.24031e+07
					4300000	0.2064	3154480	7310000	1.72235e+07	3.12727e+06	2.03507e+07	1.56544e+07	4.76957e+06	5000000	350000	3.74303e+07	7.03512e+07	3.29209e+07
					4400000	0.2112	3.20672e+06	7480000	1.75087e+07	3.25765e+06	2.07663e+07	15974112	4.84856e+06	5000000	350000	3.80949e+07	7.15163e+07	3.34214e+07
					4500000	0.216	3258000	7650000	17788680	3390660	21179340	16291800	4926096	5000000	350000	38755436	72659916	33904480
					4600000	0.2208	3308320	7820000	1.80634e+07	3.52629e+06	2.15897e+07	1.66075e+07	5.00218e+06	5000000	350000	3.94119e+07	7.37822e+07	3.43703e+07
					4700000	0.2256	3.35768e+06	7990000	1.83329e+07	3.66453e+06	2.19975e+07	16921128	5.07681e+06	5000000	350000	4.00643e+07	7.4883e+07	3.48187e+07
					4800000	0.2304	3406080	8160000	1.85972e+07	3.8054e+06	2.24026e+07	17232768	5.14999e+06	5000000	350000	4.07126e+07	7.59624e+07	3.52498e+07
					4900000	0.2352	3453520	8330000	1.88562e+07	3.94889e+06	2.28051e+07	1.75424e+07	5.22172e+06	5000000	350000	4.13568e+07	7.70204e+07	3.56636e+07
					5000000	0.24	3500000	8500000	19110000	4095000	23205000	17850000	5292000	5000000	350000	41997000	78057000	36060000
					0	0	0	0	0	0	0	0	0	6000000	420000	6000000	0	-6000000
					100000	0.004	93600	170000	511056	17472	528528	406560	141523	6000000	420000	6.84005e+06	2.08747e+06	-4752584
					200000	0.008	186400	340000	1017744	37128	1054872	811440	281837	6000000	420000	7.67671e+06	4.15709e+06	-3.51962e+06
					300000	0.012	278400	510000	1520064	58968	1579032	1214640	420941	6000000	420000	8.50997e+06	6.20888e+06	-2301096
					400000	0.016	369600	680000	2018016	82992	2101008	1616160	558835	6000000	420000	9.33984e+06	8.24282e+06	-1.09702e+06
					500000	0.02	460000	850000	2.5116e+06	109200	2.6208e+06	2.016e+06	695520	6000000	420000	10166320	10258920	92600
					600000	0.024	549600	1020000	3000816	137592	3138408	2414160	830995	6000000	420000	1.09894e+07	1.22572e+07	1.26778e+06
					700000	0.028	638400	1190000	3485664	168168	3653832	2810640	965261	6000000	420000	1.18091e+07	1.42376e+07	2428504
					800000	0.032	726400	1360000	3.96614e+06	200928	4167072	3205440	1.09832e+06	6000000	420000	1.26254e+07	1.62002e+07	3.57478e+06
					900000	0.036	813600	1530000	4442256	235872	4678128	3598560	1.23016e+06	6000000	420000	1.34383e+07	1.81449e+07	4706616
					1000000	0.04	900000	1700000	4.914e+06	273000	5.187e+06	3.99e+06	1360800	6000000	420000	14247800	20071800	5824000
					1100000	0.044	985600	1870000	5.38138e+06	312312	5.69369e+06	4.37976e+06	1.49023e+06	6000000	420000	1.50539e+07	2.19809e+07	6.92694e+06
					1200000	0.048	1070400	2040000	5844384	353808	6198192	4767840	1.61844e+06	6000000	420000	1.58566e+07	2.38721e+07	8015424
					1300000	0.052	1.1544e+06	2210000	6.30302e+06	397488	6700512	5154240	1.74545e+06	6000000	420000	1.6656e+07	2.57454e+07	9.08946e+06
					1400000	0.056	1.2376e+06	2380000	6.7573e+06	443352	7200648	5538960	1.87125e+06	6000000	420000	1.74519e+07	2.7601e+07	1.01491e+07
					1500000	0.06	1.32e+06	2550000	7.2072e+06	491400	7698600	5922000	1.99584e+06	6000000	420000	18244440	2.94386e+07	1.11942e+07
					1600000	0.064	1.4016e+06	2720000	7.65274e+06	541632	8194368	6303360	2.11922e+06	6000000	420000	1.90336e+07	3.12585e+07	1.22249e+07
					1700000	0.068	1.4824e+06	2890000	8.0939e+06	594048	8687952	6683040	2.24139e+06	6000000	420000	1.98193e+07	3.30605e+07	1.32411e+07
					1800000	0.072	1562400	3060000	8530704	648648	9179352	7061040	2.36235e+06	6000000	420000	2.06017e+07	3.48446e+07	1.42429e+07
					1900000	0.076	1641600	3230000	8963136	705432	9668568	7437360	2.4821e+06	6000000	420000	2.13807e+07	3.6611e+07	1.52303e+07
					2000000	0.08	1720000	3400000	9391200	764400	10155600	7812000	2600640	6000000	420000	22156240	38359440	16203200
					2100000	0.084	1797600	3570000	9814896	825552	10640448	8184960	2.71797e+06	6000000	420000	2.29284e+07	4.00901e+07	1.71617e+07
					2200000	0.088	1874400	3740000	10234224	888888	11123112	8556240	2.83409e+06	6000000	420000	2.36972e+07	4.18029e+07	1.81057e+07
					2300000	0.092	1950400	3910000	10649184	954408	11603592	8925840	2.949e+06	6000000	420000	2.44626e+07	4.34978e+07	1.90352e+07
					2400000	0.096	2025600	4080000	11059776	1022112	12081888	9293760	3.06271e+06	6000000	420000	2.52246e+07	4.51749e+07	1.99503e+07
					2500000	0.1	2100000	4250000	11466000	1092000	12558000	9660000	3175200	6000000	420000	25983200	46834200	20851000
					2600000	0.104	2173600	4420000	11867856	1164072	13031928	10024560	3.28648e+06	6000000	420000	2.67384e+07	4.84756e+07	2.17372e+07
					2700000	0.108	2246400	4590000	12265344	1238328	13503672	10387440	3.39656e+06	6000000	420000	2.74902e+07	5.00992e+07	2.2609e+07
					2800000	0.112	2318400	4760000	12658464	1314768	13973232	10748640	3.50542e+06	6000000	420000	2.82387e+07	5.1705e+07	2.34663e+07
					2900000	0.116	2389600	4930000	13047216	1393392	14440608	11108160	3.61308e+06	6000000	420000	2.89837e+07	5.32929e+07	2.43092e+07
					3000000	0.12	2460000	5100000	13431600	1474200	14905800	11466000	3719520	6000000	420000	29725320	54862920	25137600
					3100000	0.124	2529600	5270000	13811616	1557192	15368808	11822160	3.82476e+06	6000000	420000	3.04636e+07	5.64151e+07	2.59516e+07
					3200000	0.128	2598400	5440000	14187264	1642368	15829632	12176640	3.92878e+06	6000000	420000	3.11984e+07	5.79495e+07	2.67511e+07
					3300000	0.132	2666400	5610000	14558544	1729728	16288272	12529440	4.0316e+06	6000000	420000	3.19299e+07	5.94661e+07	2.75362e+07
					3400000	0.136	2733600	5780000	14925456	1819272	16744728	12880560	4.1332e+06	6000000	420000	3.26579e+07	6.09647e+07	2.83068e+07
					3500000	0.14	2.8e+06	5950000	1.5288e+07	1.911e+06	17199000	13230000	4233600	6000000	420000	33382600	6.24456e+07	2.9063e+07
					3600000	0.144	2.8656e+06	6120000	1.56462e+07	2.00491e+06	17651088	13577760	4.33279e+06	6000000	420000	3.41039e+07	6.39086e+07	2.98047e+07
					3700000	0.148	2.9304e+06	6290000	1.6e+07	2.10101e+06	18100992	13923840	4.43076e+06	6000000	420000	3.48218e+07	6.53538e+07	3.0532e+07
					3800000	0.152	2.9944e+06	6460000	1.63494e+07	2.19929e+06	18548712	14268240	4.52753e+06	6000000	420000	3.55362e+07	6.67811e+07	3.12449e+07
					3900000	0.156	3.0576e+06	6630000	1.66945e+07	2.29975e+06	18994248	14610960	4.62309e+06	6000000	420000	3.62473e+07	6.81906e+07	3.19433e+07
					4000000	0.16	3.12e+06	6800000	17035200	2.4024e+06	19437600	14952000	4717440	6000000	420000	36955040	69582240	32627200
					4100000	0.164	3.1816e+06	6970000	17371536	2.50723e+06	19878768	15291360	4.81058e+06	6000000	420000	3.76593e+07	7.0956e+07	3.32967e+07
					4200000	0.168	3242400	7140000	17703504	2614248	20317752	15629040	4.90251e+06	6000000	420000	3.83603e+07	7.2312e+07	33951744
					4300000	0.172	3.3024e+06	7310000	18031104	2.72345e+06	20754552	15965040	4.99323e+06	6000000	420000	3.90578e+07	7.36501e+07	34592344
					4400000	0.176	3361600	7480000	18354336	2834832	21189168	16299360	5.08274e+06	6000000	420000	3.97519e+07	7.49704e+07	35218496
					4500000	0.18	3.42e+06	7650000	18673200	2.9484e+06	21621600	16632000	5171040	6000000	420000	40442640	76272840	35830200
					4600000	0.184	3477600	7820000	18987696	3064152	22051848	16962960	5.25813e+06	6000000	420000	4.113e+07	7.75574e+07	36427456
					4700000	0.188	3.5344e+06	7990000	19297824	3.18209e+06	22479912	17292240	5.34401e+06	6000000	420000	4.18139e+07	7.88242e+07	37010264
					4800000	0.192	3590400	8160000	19603584	3302208	22905792	17619840	5.42868e+06	6000000	420000	4.24945e+07	8.00731e+07	3.75786e+07
					4900000	0.196	3645600	8330000	19904976	3424512	23329488	17945760	5.51215e+06	6000000	420000	4.31716e+07	8.13042e+07	38132536
					5000000	0.2	3700000	8500000	20202000	3549000	23751000	18270000	5594400	6000000	420000	43845400	82517400	38672000
					0	0	0	0	0	0	0	0	0	7000000	490000	7000000	0	-7000000
					100000	0.00342857	93657.1	170000	511368	17316	528684	406680	141610	7000000	490000	7.84029e+06	2.08874e+06	-5751552
					200000	0.00685714	186629	340000	1018992	36504	1055496	811920	282182	7000000	490000	8.67768e+06	4.16219e+06	-4.51549e+06
					300000	0.0102857	278914	510000	1522872	57564	1580436	1215720	421718	7000000	490000	9.51215e+06	6.22035e+06	-3.29181e+06
					400000	0.0137143	370514	680000	2023008	80496	2103504	1618080	560218	7000000	490000	1.03437e+07	8.26321e+06	-2.08051e+06
					500000	0.0171429	461429	850000	2519400	105300	2624700	2019000	697680	7000000	490000	11172380	10290780	-881600
					600000	0.0205714	551657	1020000	3012048	131976	3144024	2418480	834106	7000000	490000	1.19981e+07	1.23031e+07	304928
					700000	0.024	641200	1190000	3500952	160524	3661476	2816520	969494	7000000	490000	1.2821e+07	1.43e+07	1479072
					800000	0.0274286	730057	1360000	3986112	190944	4177056	3213120	1.10385e+06	7000000	490000	1.36409e+07	1.62817e+07	2640832
					900000	0.0308571	818229	1530000	4467528	223236	4690764	3608280	1.23716e+06	7000000	490000	1.44579e+07	1.82481e+07	3.79021e+06
					1000000	0.0342857	905714	1700000	4945200	257400	5202600	4002000	1369440	7000000	490000	15272040	20199240	4927200
					1100000	0.0377143	992514	1870000	5419128	293436	5712564	4394280	1.50068e+06	7000000	490000	1.60832e+07	2.21351e+07	6.05181e+06
					1200000	0.0411429	1.07863e+06	2040000	5889312	331344	6220656	4785120	1.63089e+06	7000000	490000	1.68915e+07	2.40556e+07	7164032
					1300000	0.0445714	1.16406e+06	2210000	6.35575e+06	371124	6.72688e+06	5.17452e+06	1.76005e+06	7000000	490000	1.76969e+07	2.59608e+07	8.26387e+06
					1400000	0.048	1.2488e+06	2380000	6.81845e+06	412776	7231224	5562480	1.88819e+06	7000000	490000	1.84994e+07	2.78507e+07	9.35133e+06
					1500000	0.0514286	1.33286e+06	2550000	7277400	456300	7733700	5949000	2.01528e+06	7000000	490000	19298980	2.97254e+07	1.04264e+07
					1600000	0.0548571	1.41623e+06	2720000	7732608	501696	8234304	6334080	2.14134e+06	7000000	490000	2.00956e+07	3.15847e+07	1.14891e+07
					1700000	0.0582857	1.49891e+06	2890000	8184072	548964	8733036	6717720	2.26636e+06	7000000	490000	2.08894e+07	3.34288e+07	1.25394e+07
					1800000	0.0617143	1.58091e+06	3060000	8631792	598104	9229896	7099920	2.39034e+06	7000000	490000	2.16802e+07	3.52576e+07	13577312
					1900000	0.0651429	1.66223e+06	3230000	9075768	649116	9724884	7480680	2.51329e+06	7000000	490000	2.24682e+07	3.7071e+07	1.46028e+07
					2000000	0.0685714	1.74286e+06	3400000	9516000	702000	10218000	7860000	2.6352e+06	7000000	490000	23253200	38869200	15616000
					2100000	0.072	1.8228e+06	3570000	9.95249e+06	756756	1.07092e+07	8.23788e+06	2.75607e+06	7000000	490000	2.40353e+07	4.06521e+07	1.66168e+07
					2200000	0.0754286	1.90206e+06	3740000	10385232	813384	11198616	8614320	2.87591e+06	7000000	490000	2.48145e+07	4.24197e+07	17605152
					2300000	0.0788571	1.98063e+06	3910000	10814232	871884	11686116	8989320	2.99471e+06	7000000	490000	2.55908e+07	4.4172e+07	18581152
					2400000	0.0822857	2.05851e+06	4080000	1.12395e+07	932256	1.21717e+07	9.36288e+06	3.11247e+06	7000000	490000	2.63642e+07	4.5909e+07	1.95448e+07
					2500000	0.0857143	2.13571e+06	4250000	1.1661e+07	994500	1.26555e+07	9.735e+06	3.2292e+06	7000000	490000	27134700	4.76307e+07	2.0496e+07
					2600000	0.0891429	2.21223e+06	4420000	12078768	1.05862e+06	13137384	10105680	3.34489e+06	7000000	490000	2.79023e+07	4.93371e+07	2.14348e+07
					2700000	0.0925714	2.28806e+06	4590000	12492792	1.1246e+06	13617396	10474920	3.45954e+06	7000000	490000	2.86669e+07	5.10283e+07	2.23613e+07
					2800000	0.096	2363200	4760000	12903072	1192464	14095536	10842720	3.57316e+06	7000000	490000	2.94287e+07	5.27041e+07	2.32754e+07
					2900000	0.0994286	2.43766e+06	4930000	13309608	1.2622e+06	14571804	11209080	3.68574e+06	7000000	490000	3.01875e+07	5.43646e+07	2.41771e+07
					3000000	0.102857	2.51143e+06	5100000	13712400	1.3338e+06	15046200	11574000	3.79728e+06	7000000	490000	30943480	56009880	25066400
					3100000	0.106286	2.58451e+06	5270000	14111448	1.40728e+06	15518724	11937480	3.90779e+06	7000000	490000	3.16965e+07	5.76398e+07	2.59433e+07
					3200000	0.109714	2.65691e+06	5440000	14506752	1.48262e+06	15989376	12299520	4.01725e+06	7000000	490000	3.24466e+07	5.92545e+07	2.68079e+07
					3300000	0.113143	2.72863e+06	5610000	14898312	1559844	16458156	12660120	4.12569e+06	7000000	490000	3.31938e+07	6.08539e+07	2.766e+07
					3400000	0.116571	2.79966e+06	5780000	15286128	1.63894e+06	16925064	13019280	4.23308e+06	7000000	490000	3.39381e+07	6.2438e+07	2.84998e+07
					3500000	0.12	2870000	5950000	15670200	1719900	17390100	13377000	4339440	7000000	490000	34679540	6.40067e+07	2.93272e+07
					3600000	0.123429	2.93966e+06	6120000	16050528	1.80274e+06	17853264	13733280	4.44476e+06	7000000	490000	3.5418e+07	6.55602e+07	3.01422e+07
					3700000	0.126857	3.00863e+06	6290000	1.64271e+07	1.88744e+06	18314556	14088120	4.54905e+06	7000000	490000	3.61536e+07	6.70984e+07	3.09448e+07
					3800000	0.130286	3.07691e+06	6460000	16799952	1.97402e+06	18773976	14441520	4.65229e+06	7000000	490000	3.68863e+07	6.86213e+07	3.17351e+07
					3900000	0.133714	3.14451e+06	6630000	17169048	2.06248e+06	19231524	14793480	4.75451e+06	7000000	490000	3.7616e+07	7.0129e+07	3.25129e+07
					4000000	0.137143	3.21143e+06	6800000	17534400	2152800	19687200	15144000	4855680	7000000	490000	38342880	71621280	33278400
					4100000	0.140571	3.27766e+06	6970000	17896008	2.245e+06	20141004	15493080	4.95582e+06	7000000	490000	3.90668e+07	7.30983e+07	3.40315e+07
					4200000	0.144	3.3432e+06	7140000	18253872	2.33906e+06	20592936	15840720	5.05492e+06	7000000	490000	3.97879e+07	7.456e+07	3.47722e+07
					4300000	0.147429	3.40806e+06	7310000	18607992	2.435e+06	21042996	16186920	5.15298e+06	7000000	490000	4.0506e+07	7.60065e+07	3.55005e+07
					4400000	0.150857	3.47223e+06	7480000	18958368	2532816	21491184	16531680	5.25001e+06	7000000	490000	4.12212e+07	7.74376e+07	3.62164e+07
					4500000	0.154286	3.53571e+06	7650000	19305000	2.6325e+06	2.19375e+07	1.6875e+07	5.346e+06	7000000	490000	41933500	7.88535e+07	3.692e+07
					4600000	0.157714	3.59851e+06	7820000	19647888	2.73406e+06	22381944	17216880	5.44095e+06	7000000	490000	4.26429e+07	8.02541e+07	3.76112e+07
					4700000	0.161143	3.66063e+06	7990000	19987032	2837484	22824516	17557320	5.53487e+06	7000000	490000	4.33494e+07	8.16393e+07	3.829e+07
					4800000	0.164571	3.72206e+06	8160000	20322432	2942784	23265216	17896320	5.62775e+06	7000000	490000	4.4053e+07	8.30093e+07	3.89564e+07
					4900000	0.168	3782800	8330000	20654088	3049956	23704044	18233880	5.71959e+06	7000000	490000	4.47536e+07	8.4364e+07	3.96104e+07
					5000000	0.171429	3.84286e+06	8500000	2.0982e+07	3.159e+06	2.4141e+07	1.857e+07	5810400	7000000	490000	45451400	85703400	40252000
					0	0	0	0	0	0	0	0	0	8000000	560000	8000000	0	-8000000
					100000	0.003	93700	170000	511602	17199	528801	406770	141674	8000000	560000	8.84048e+06	2.0897e+06	-6750778
					200000	0.006	186800	340000	1019928	36036	1055964	812280	282442	8000000	560000	9.67841e+06	4.16601e+06	-5512392
					300000	0.009	279300	510000	1524978	56511	1581489	1216530	422302	8000000	560000	1.05138e+07	6.22895e+06	-4.28484e+06
					400000	0.012	371200	680000	2026752	78624	2105376	1619520	561254	8000000	560000	1.13466e+07	8.2785e+06	-3068128
					500000	0.015	462500	850000	2.52525e+06	102375	2.62762e+06	2.02125e+06	699300	8000000	560000	12176925	10314675	-1862250
					600000	0.018	553200	1020000	3020472	127764	3148236	2421720	836438	8000000	560000	1.30047e+07	1.23375e+07	-667208
					700000	0.021	643300	1190000	3512418	154791	3667209	2820930	972670	8000000	560000	1.38299e+07	1.43469e+07	516998
					800000	0.024	732800	1360000	4.00109e+06	183456	4184544	3218880	1.10799e+06	8000000	560000	1.46525e+07	1.63429e+07	1.69037e+06
					900000	0.027	821700	1530000	4486482	213759	4700241	3615570	1.24241e+06	8000000	560000	1.54727e+07	1.83256e+07	2.8529e+06
					1000000	0.03	910000	1700000	4.9686e+06	245700	5.2143e+06	4.011e+06	1375920	8000000	560000	16290220	20294820	4004600
					1100000	0.033	997700	1870000	5.44744e+06	279279	5.72672e+06	4.40517e+06	1.50852e+06	8000000	560000	1.71052e+07	2.22507e+07	5.14546e+06
					1200000	0.036	1084800	2040000	5923008	314496	6237504	4798080	1.64022e+06	8000000	560000	1.79177e+07	2.41932e+07	6275488
					1300000	0.039	1171300	2210000	6395298	351351	6746649	5189730	1.77101e+06	8000000	560000	1.87277e+07	2.61223e+07	7394678
					1400000	0.042	1.2572e+06	2380000	6.86431e+06	389844	7254156	5580120	1.90089e+06	8000000	560000	1.9535e+07	2.80381e+07	8.50303e+06
					1500000	0.045	1.3425e+06	2550000	7.33005e+06	429975	7760025	5969250	2.02986e+06	8000000	560000	20339885	2.99404e+07	9.60055e+06
					1600000	0.048	1.4272e+06	2720000	7.79251e+06	471744	8264256	6357120	2.15793e+06	8000000	560000	2.11422e+07	3.18294e+07	1.06872e+07
					1700000	0.051	1.5113e+06	2890000	8.2517e+06	515151	8766849	6743730	2.28509e+06	8000000	560000	2.19419e+07	3.3705e+07	1.17631e+07
					1800000	0.054	1.5948e+06	3060000	8707608	560196	9267804	7129080	2.41134e+06	8000000	560000	2.27391e+07	3.55672e+07	1.28281e+07
					1900000	0.057	1.6777e+06	3230000	9160242	606879	9767121	7513170	2.53668e+06	8000000	560000	2.35338e+07	3.74161e+07	13882262
					2000000	0.06	1.76e+06	3400000	9609600	655200	10264800	7896000	2661120	8000000	560000	24325920	39251520	14925600
					2100000	0.063	1.8417e+06	3570000	1.00557e+07	705159	1.07608e+07	8.27757e+06	2.78465e+06	8000000	560000	2.51155e+07	4.10736e+07	15958102
					2200000	0.066	1.9228e+06	3740000	1.04985e+07	756756	1.12552e+07	8.65788e+06	2.90727e+06	8000000	560000	2.59025e+07	4.28823e+07	1.69798e+07
					2300000	0.069	2003300	3910000	10938018	809991	11748009	9036930	3.02899e+06	8000000	560000	2.6687e+07	4.46776e+07	17990598
					2400000	0.072	2.0832e+06	4080000	1.13743e+07	864864	1.22391e+07	9.41472e+06	3.1498e+06	8000000	560000	2.74689e+07	4.64595e+07	1.89906e+07
					2500000	0.075	2162500	4250000	11807250	921375	12728625	9791250	3269700	8000000	560000	28248325	48228075	19979750
					2600000	0.078	2.2412e+06	4420000	1.2237e+07	979524	13216476	10166520	3.38869e+06	8000000	560000	2.90252e+07	4.99832e+07	2.09581e+07
					2700000	0.081	2319300	4590000	12663378	1039311	13702689	10540530	3.50678e+06	8000000	560000	2.97995e+07	5.1725e+07	21925558
					2800000	0.084	2.3968e+06	4760000	1.30865e+07	1.10074e+06	14187264	10913280	3.62396e+06	8000000	560000	3.05712e+07	5.34534e+07	2.28822e+07
					2900000	0.087	2473700	4930000	13506402	1163799	14670201	11284770	3.74023e+06	8000000	560000	3.13404e+07	5.51685e+07	2.3828e+07
					3000000	0.09	2550000	5100000	13923000	1228500	15151500	11655000	3855600	8000000	560000	32107100	56870100	24763000
					3100000	0.093	2625700	5270000	14336322	1294839	15631161	12023970	3.97006e+06	8000000	560000	3.28712e+07	5.85584e+07	2.56871e+07
					3200000	0.096	2700800	5440000	14746368	1362816	16109184	12391680	4.08361e+06	8000000	560000	3.36328e+07	6.02332e+07	26600448
					3300000	0.099	2775300	5610000	15153138	1432431	16585569	12758130	4.19625e+06	8000000	560000	3.43918e+07	6.18947e+07	27502918
					3400000	0.102	2849200	5780000	15556632	1503684	17060316	13123320	4.30799e+06	8000000	560000	3.51483e+07	6.35429e+07	2.83946e+07
					3500000	0.105	2922500	5950000	15956850	1576575	17533425	13487250	4418820	8000000	560000	35902245	6.51776e+07	2.92754e+07
					3600000	0.108	2995200	6120000	16353792	1651104	18004896	13849920	4.52874e+06	8000000	560000	3.66536e+07	6.6799e+07	3.01453e+07
					3700000	0.111	3067300	6290000	16747458	1727271	18474729	14211330	4.63776e+06	8000000	560000	3.74025e+07	6.84069e+07	3.10044e+07
					3800000	0.114	3138800	6460000	17137848	1805076	18942924	14571480	4.74587e+06	8000000	560000	3.81488e+07	7.00015e+07	3.18527e+07
					3900000	0.117	3209700	6630000	17524962	1884519	19409481	14930370	4.85307e+06	8000000	560000	3.88925e+07	7.15827e+07	3.26902e+07
					4000000	0.12	3280000	6800000	17908800	1965600	19874400	15288000	4959360	8000000	560000	39633760	73150560	33516800
					4100000	0.123	3349700	6970000	18289362	2048319	20337681	15644370	5.06475e+06	8000000	560000	4.03724e+07	7.4705e+07	3.43326e+07
					4200000	0.126	3418800	7140000	18666648	2132676	20799324	15999480	5.16923e+06	8000000	560000	4.11085e+07	7.62461e+07	3.51375e+07
					4300000	0.129	3.4873e+06	7310000	19040658	2.21867e+06	21259329	16353330	5.2728e+06	8000000	560000	4.18421e+07	7.77738e+07	3.59316e+07
					4400000	0.132	3.5552e+06	7480000	19411392	2.3063e+06	21717696	16705920	5.37546e+06	8000000	560000	4.25732e+07	7.92881e+07	3.67149e+07
					4500000	0.135	3.6225e+06	7650000	1.97788e+07	2.39558e+06	2.21744e+07	1.70572e+07	5477220	8000000	560000	43301645	80788995	37487350
					4600000	0.138	3.6892e+06	7820000	2.0143e+07	2.48648e+06	2.26295e+07	1.74073e+07	5.57807e+06	8000000	560000	4.40276e+07	8.22765e+07	38248952
					4700000	0.141	3.7553e+06	7990000	2.05039e+07	2.57903e+06	2.3083e+07	1.77561e+07	5.67801e+06	8000000	560000	4.4751e+07	8.37507e+07	3.89997e+07
					4800000	0.144	3.8208e+06	8160000	2.08616e+07	2.67322e+06	2.35348e+07	1.81037e+07	5.77705e+06	8000000	560000	4.54718e+07	8.52115e+07	3.97396e+07
					4900000	0.147	3.8857e+06	8330000	2.12159e+07	2.76904e+06	2.3985e+07	1.845e+07	5.87518e+06	8000000	560000	4.61901e+07	8.66589e+07	4.04687e+07
					5000000	0.15	3.95e+06	8500000	2.1567e+07	2.8665e+06	2.44335e+07	1.8795e+07	5.9724e+06	8000000	560000	46905900	8.80929e+07	4.1187e+07
					0	0	0	0	0	0	0	0	0	9000000	630000	9000000	0	-9000000
					100000	0.00266667	93733.3	170000	511784	17108	528892	406840	141725	9000000	630000	9.84062e+06	2.09044e+06	-7.75018e+06
					200000	0.00533333	186933	340000	1.02066e+06	35672	1.05633e+06	812560	282643	9000000	630000	1.0679e+07	4.16899e+06	-6.50998e+06
					300000	0.008	279600	510000	1526616	55692	1582308	1217160	422755	9000000	630000	1.15151e+07	6.23564e+06	-5.27942e+06
					400000	0.0106667	371733	680000	2.02966e+06	77168	2106832	1620640	562061	9000000	630000	1.23489e+07	8.2904e+06	-4058496
					500000	0.0133333	463333	850000	2529800	100100	2629900	2023000	700560	9000000	630000	13180460	10333260	-2847200
					600000	0.016	554400	1020000	3027024	124488	3151512	2424240	838253	9000000	630000	1.40098e+07	1.23642e+07	-1645536
					700000	0.0186667	644933	1190000	3.52134e+06	150332	3.67167e+06	2.82436e+06	975139	9000000	630000	1.48368e+07	1.43833e+07	-453504
					800000	0.0213333	734933	1360000	4.01274e+06	177632	4.19037e+06	3.22336e+06	1.11122e+06	9000000	630000	1.56616e+07	1.63905e+07	728896
					900000	0.024	824400	1530000	4501224	206388	4707612	3621240	1.24649e+06	9000000	630000	1.64841e+07	1.83858e+07	1.90166e+06
					1000000	0.0266667	913333	1700000	4986800	236600	5223400	4018000	1380960	9000000	630000	17304360	20369160	3064800
					1100000	0.0293333	1.00173e+06	1870000	5469464	268268	5737732	4413640	1.51462e+06	9000000	630000	1.81224e+07	2.23407e+07	4218304
					1200000	0.032	1089600	2040000	5949216	301392	6250608	4808160	1.64748e+06	9000000	630000	1.89381e+07	2.43003e+07	5.36218e+06
					1300000	0.0346667	1.17693e+06	2210000	6426056	335972	6762028	5201560	1.77952e+06	9000000	630000	1.97516e+07	2.6248e+07	6.49642e+06
					1400000	0.0373333	1.26373e+06	2380000	6.89998e+06	372008	7.27199e+06	5.59384e+06	1.91076e+06	9000000	630000	2.05628e+07	2.81838e+07	7.62102e+06
					1500000	0.04	1.35e+06	2550000	7.371e+06	409500	7780500	5985000	2.0412e+06	9000000	630000	21371700	3.01077e+07	8.736e+06
					1600000	0.0426667	1.43573e+06	2720000	7.8391e+06	448448	8.28755e+06	6.37504e+06	2.17083e+06	9000000	630000	2.21784e+07	3.20197e+07	9.84134e+06
					1700000	0.0453333	1.52093e+06	2890000	8.3043e+06	488852	8793148	6763960	2.29965e+06	9000000	630000	2.29828e+07	3.39199e+07	1.09371e+07
					1800000	0.048	1.6056e+06	3060000	8766576	530712	9297288	7151760	2.42767e+06	9000000	630000	2.3785e+07	3.58081e+07	1.20231e+07
					1900000	0.0506667	1.68973e+06	3230000	9225944	574028	9799972	7538440	2.55488e+06	9000000	630000	2.45848e+07	3.76844e+07	1.30996e+07
					2000000	0.0533333	1.77333e+06	3400000	9682400	618800	10301200	7924000	2681280	9000000	630000	25382480	39548880	14166400
					2100000	0.056	1.8564e+06	3570000	1.01359e+07	665028	1.0801e+07	8.30844e+06	2.80688e+06	9000000	630000	2.61778e+07	4.14014e+07	15223584
					2200000	0.0586667	1.93893e+06	3740000	10586576	712712	11299288	8691760	2.93167e+06	9000000	630000	2.6971e+07	4.32421e+07	1.62711e+07
					2300000	0.0613333	2.02093e+06	3910000	1.10343e+07	761852	1.17961e+07	9.07396e+06	3.05565e+06	9000000	630000	2.77618e+07	4.50709e+07	1.73091e+07
					2400000	0.064	2.1024e+06	4080000	1.14791e+07	812448	12291552	9455040	3.17883e+06	9000000	630000	2.85504e+07	4.68877e+07	1.83373e+07
					2500000	0.0666667	2.18333e+06	4250000	1.1921e+07	864500	1.27855e+07	9.835e+06	3.3012e+06	9000000	630000	29336700	4.86927e+07	1.9356e+07
					2600000	0.0693333	2.26373e+06	4420000	1.236e+07	918008	1.3278e+07	1.02138e+07	3.42276e+06	9000000	630000	3.01208e+07	5.04858e+07	2.0365e+07
					2700000	0.072	2343600	4590000	12796056	972972	13769028	10591560	3.54352e+06	9000000	630000	3.09026e+07	5.2267e+07	2.13644e+07
					2800000	0.0746667	2.42293e+06	4760000	1.32292e+07	1.02939e+06	1.42586e+07	1.09682e+07	3.66348e+06	9000000	630000	3.16821e+07	5.40363e+07	22354176
					2900000	0.0773333	2.50173e+06	4930000	1.36595e+07	1.08727e+06	1.47467e+07	1.13436e+07	3.78262e+06	9000000	630000	3.24594e+07	5.57937e+07	2.33343e+07
					3000000	0.08	2580000	5100000	14086800	1146600	15233400	11718000	3900960	9000000	630000	33234360	57539160	24304800
					3100000	0.0826667	2.65773e+06	5270000	1.45112e+07	1.20739e+06	1.57186e+07	1.20912e+07	4.01849e+06	9000000	630000	3.40071e+07	5.92728e+07	2.52657e+07
					3200000	0.0853333	2.73493e+06	5440000	1.49327e+07	1.26963e+06	1.62024e+07	1.24634e+07	4.13522e+06	9000000	630000	3.47776e+07	6.09945e+07	26216896
					3300000	0.088	2811600	5610000	15351336	1333332	16684668	12834360	4.25114e+06	9000000	630000	3.55458e+07	6.27043e+07	27158496
					3400000	0.0906667	2.88773e+06	5780000	1.5767e+07	1.39849e+06	17165512	13204240	4.36625e+06	9000000	630000	3.63118e+07	6.44022e+07	2.80905e+07
					3500000	0.0933333	2.96333e+06	5950000	1.61798e+07	1.4651e+06	1.76449e+07	1.3573e+07	4480560	9000000	630000	37075460	6.60883e+07	2.90128e+07
					3600000	0.096	3038400	6120000	16589664	1533168	18122832	13940640	4.59406e+06	9000000	630000	3.78369e+07	6.77624e+07	29925504
					3700000	0.0986667	3.11293e+06	6290000	16996616	1.60269e+06	18599308	14307160	4.70676e+06	9000000	630000	3.85961e+07	6.94246e+07	3.08286e+07
					3800000	0.101333	3.18693e+06	6460000	1.74007e+07	1.67367e+06	1.90743e+07	1.46726e+07	4.81864e+06	9000000	630000	3.9353e+07	7.1075e+07	31722016
					3900000	0.104	3260400	6630000	17801784	1746108	19547892	15036840	4.92972e+06	9000000	630000	4.01076e+07	7.27134e+07	32605824
					4000000	0.106667	3.33333e+06	6800000	18200000	1.82e+06	20020000	15400000	5040000	9000000	630000	40860000	74340000	33480000
					4100000	0.109333	3.40573e+06	6970000	1.85953e+07	1.89535e+06	2.04907e+07	1.5762e+07	5.14947e+06	9000000	630000	4.16101e+07	7.59547e+07	3.43445e+07
					4200000	0.112	3477600	7140000	18987696	1972152	20959848	16122960	5.25813e+06	9000000	630000	4.2358e+07	7.75574e+07	35199456
					4300000	0.114667	3.54893e+06	7310000	19377176	2.05041e+06	21427588	16482760	5.36599e+06	9000000	630000	4.31036e+07	7.91483e+07	3.60447e+07
					4400000	0.117333	3.61973e+06	7480000	19763744	2130128	21893872	16841440	5.47304e+06	9000000	630000	4.38469e+07	8.07273e+07	3.68804e+07
					4500000	0.12	3690000	7650000	20147400	2211300	22358700	17199000	5579280	9000000	630000	44587980	82294380	37706400
					4600000	0.122667	3.75973e+06	7820000	20528144	2.29393e+06	22822072	17555440	5.68472e+06	9000000	630000	4.53268e+07	8.38496e+07	3.85228e+07
					4700000	0.125333	3.82893e+06	7990000	20905976	2.37801e+06	23283988	17910760	5.78935e+06	9000000	630000	4.60633e+07	8.53929e+07	39329536
					4800000	0.128	3.8976e+06	8160000	2.12809e+07	2.46355e+06	2.37444e+07	1.8265e+07	5.89317e+06	9000000	630000	4.67976e+07	8.69243e+07	4.01267e+07
					4900000	0.130667	3.96573e+06	8330000	21652904	2.55055e+06	24203452	18618040	5.99619e+06	9000000	630000	4.75296e+07	8.84438e+07	4.09141e+07
					5000000	0.133333	4.03333e+06	8500000	22022000	2.639e+06	24661000	18970000	6098400	9000000	630000	48259400	89951400	41692000
					0	0	0	0	0	0	0	0	0	10000000	700000	10000000	0	-10000000
					100000	0.0024	93760	170000	511930	17035.2	528965	406896	141765	10000000	700000	1.08407e+07	2.09104e+06	-8.74969e+06
					200000	0.0048	187040	340000	1.02124e+06	35380.8	1.05662e+06	812784	282804	10000000	700000	1.16794e+07	4.17137e+06	-7.50806e+06
					300000	0.0072	279840	510000	1.52793e+06	55036.8	1.58296e+06	1217664	423118	10000000	700000	1.25161e+07	6.24099e+06	-6.27509e+06
					400000	0.0096	372160	680000	2.03199e+06	76003.2	2.108e+06	1.62154e+06	562706	10000000	700000	1.33507e+07	8.29991e+06	-5.05079e+06
					500000	0.012	464000	850000	2.53344e+06	98280	2.63172e+06	2.0244e+06	701568	10000000	700000	14183288	10348128	-3835160
					600000	0.0144	555360	1020000	3.03227e+06	121867	3.15413e+06	2426256	839704	10000000	700000	1.50138e+07	1.23856e+07	-2.6282e+06
					700000	0.0168	646240	1190000	3.52847e+06	146765	3.67524e+06	2.8271e+06	977115	10000000	700000	1.58424e+07	1.44124e+07	-1.42991e+06
					800000	0.0192	736640	1360000	4.02205e+06	172973	4.19503e+06	3226944	1.1138e+06	10000000	700000	1.66688e+07	1.64285e+07	-240282
					900000	0.0216	826560	1530000	4.51302e+06	200491	4.71351e+06	3.62578e+06	1.24976e+06	10000000	700000	1.74933e+07	1.84339e+07	940674
					1000000	0.024	916000	1700000	5.00136e+06	229320	5.23068e+06	4.0236e+06	1384992	10000000	700000	18315672	20428632	2112960
					1100000	0.0264	1004960	1870000	5.48708e+06	259459	5.74654e+06	4420416	1.5195e+06	10000000	700000	1.9136e+07	2.24126e+07	3.27658e+06
					1200000	0.0288	1.09344e+06	2040000	5.97018e+06	290909	6.26109e+06	4816224	1.65328e+06	10000000	700000	1.99544e+07	2.43859e+07	4.43153e+06
					1300000	0.0312	1181440	2210000	6.45066e+06	323669	6.77433e+06	5211024	1.78634e+06	10000000	700000	2.07707e+07	2.63485e+07	5.57781e+06
					1400000	0.0336	1268960	2380000	6.92852e+06	357739	7.28626e+06	5604816	1.91867e+06	10000000	700000	2.15849e+07	2.83003e+07	6.71542e+06
					1500000	0.036	1.356e+06	2550000	7.40376e+06	393120	7796880	5997600	2.05027e+06	10000000	700000	22397152	3.02415e+07	7.84436e+06
					1600000	0.0384	1442560	2720000	7.87638e+06	429811	8.30619e+06	6389376	2.18115e+06	10000000	700000	2.32073e+07	3.2172e+07	8.96463e+06
					1700000	0.0408	1528640	2890000	8.34637e+06	467813	8.81419e+06	6.78014e+06	2.3113e+06	10000000	700000	2.40155e+07	3.40917e+07	1.00762e+07
					1800000	0.0432	1.61424e+06	3060000	8.81375e+06	507125	9.32088e+06	7.1699e+06	2.44073e+06	10000000	700000	2.48216e+07	3.60008e+07	1.11792e+07
					1900000	0.0456	1699360	3230000	9.27851e+06	547747	9.82625e+06	7.55866e+06	2.56943e+06	10000000	700000	2.56257e+07	3.78991e+07	1.22734e+07
					2000000	0.048	1.784e+06	3400000	9740640	589680	10330320	7946400	2697408	10000000	700000	26427728	39786768	13359040
					2100000	0.0504	1868160	3570000	1.02002e+07	632923	1.08331e+07	8.33314e+06	2.82466e+06	10000000	700000	2.72277e+07	4.16637e+07	1.4436e+07
					2200000	0.0528	1951840	3740000	1.0657e+07	677477	1.13345e+07	8718864	2.95118e+06	10000000	700000	2.80257e+07	4.35299e+07	1.55042e+07
					2300000	0.0552	2.03504e+06	3910000	1.11113e+07	723341	1.18347e+07	9103584	3.07698e+06	10000000	700000	2.88216e+07	4.53855e+07	1.65638e+07
					2400000	0.0576	2117760	4080000	1.1563e+07	770515	1.23335e+07	9.4873e+06	3.20205e+06	10000000	700000	2.96155e+07	4.72303e+07	1.76147e+07
					2500000	0.06	2.2e+06	4250000	1.2012e+07	819000	12831000	9870000	3.3264e+06	10000000	700000	30407400	4.90644e+07	1.8657e+07
					2600000	0.0624	2281760	4420000	1.24584e+07	868795	1.33272e+07	1.02517e+07	3.45002e+06	10000000	700000	3.11972e+07	5.08878e+07	1.96906e+07
					2700000	0.0648	2363040	4590000	1.29022e+07	919901	1.38221e+07	10632384	3.57292e+06	10000000	700000	3.1985e+07	5.27005e+07	2.07155e+07
					2800000	0.0672	2.44384e+06	4760000	1.33434e+07	972317	1.43157e+07	1.10121e+07	3.69509e+06	10000000	700000	3.27708e+07	5.45025e+07	2.17318e+07
					2900000	0.0696	2524160	4930000	1.37819e+07	1.02604e+06	1.4808e+07	1.13907e+07	3.81653e+06	10000000	700000	3.35545e+07	5.62938e+07	2.27393e+07
					3000000	0.072	2604000	5100000	14217840	1081080	15298920	11768400	3937248	10000000	700000	34336168	58074408	23738240
					3100000	0.0744	2683360	5270000	1.46511e+07	1.13743e+06	1.57886e+07	1.21451e+07	4.05724e+06	10000000	700000	3.51158e+07	5.98443e+07	2.47285e+07
					3200000	0.0768	2762240	5440000	1.50818e+07	1.19508e+06	1.62769e+07	12520704	4.17651e+06	10000000	700000	3.58934e+07	6.16035e+07	2.57101e+07
					3300000	0.0792	2840640	5610000	1.55099e+07	1.25405e+06	1.67639e+07	12895344	4.29505e+06	10000000	700000	3.6669e+07	6.3352e+07	2.6683e+07
					3400000	0.0816	2918560	5780000	1.59353e+07	1.31433e+06	1.72497e+07	13268976	4.41286e+06	10000000	700000	3.74425e+07	6.50897e+07	2.76472e+07
					3500000	0.084	2996000	5950000	16358160	1375920	17734080	13641600	4529952	10000000	700000	38214032	6.68168e+07	2.86028e+07
					3600000	0.0864	3.07296e+06	6120000	1.67784e+07	1.43882e+06	1.82172e+07	14013216	4.64632e+06	10000000	700000	3.89835e+07	6.85332e+07	2.95497e+07
					3700000	0.0888	3149440	6290000	1.71959e+07	1.50303e+06	1.8699e+07	1.43838e+07	4.76195e+06	10000000	700000	3.97509e+07	7.02388e+07	3.04879e+07
					3800000	0.0912	3225440	6460000	1.76109e+07	1.56855e+06	1.91795e+07	1.47534e+07	4.87687e+06	10000000	700000	4.05163e+07	7.19338e+07	3.14174e+07
					3900000	0.0936	3.30096e+06	6630000	1.80232e+07	1.63538e+06	1.96586e+07	15122016	4.99105e+06	10000000	700000	4.12797e+07	7.3618e+07	3.23383e+07
					4000000	0.096	3376000	6800000	18432960	1703520	20136480	15489600	5104512	10000000	700000	42040992	75291552	33250560
					4100000	0.0984	3.45056e+06	6970000	1.88401e+07	1.77297e+06	2.0613e+07	15856176	5.21725e+06	10000000	700000	4.28003e+07	7.69544e+07	3.41541e+07
					4200000	0.1008	3524640	7140000	1.92445e+07	1.84373e+06	2.10883e+07	1.62217e+07	5.32926e+06	10000000	700000	4.35575e+07	7.86065e+07	3.5049e+07
					4300000	0.1032	3598240	7310000	1.96464e+07	1.9158e+06	2.15622e+07	1.65863e+07	5.44054e+06	10000000	700000	4.43127e+07	8.02479e+07	3.59352e+07
					4400000	0.1056	3.67136e+06	7480000	2.00456e+07	1.98919e+06	2.20348e+07	1.69499e+07	5.5511e+06	10000000	700000	4.50659e+07	8.18787e+07	3.68128e+07
					4500000	0.108	3744000	7650000	20442240	2063880	22506120	17312400	5660928	10000000	700000	45817048	83498688	37681640
					4600000	0.1104	3.81616e+06	7820000	2.08362e+07	2.13988e+06	2.29761e+07	1.76739e+07	5.77003e+06	10000000	700000	4.65662e+07	8.5108e+07	3.85418e+07
					4700000	0.1128	3.88784e+06	7990000	2.12276e+07	2.2172e+06	2.34448e+07	1.80345e+07	5.87841e+06	10000000	700000	4.73132e+07	8.67066e+07	3.93934e+07
					4800000	0.1152	3959040	8160000	2.16164e+07	2.29582e+06	2.39122e+07	18393984	5.98607e+06	10000000	700000	4.80582e+07	8.82945e+07	4.02363e+07
					4900000	0.1176	4.02976e+06	8330000	2.20025e+07	2.37576e+06	2.43782e+07	18752496	6.093e+06	10000000	700000	4.88012e+07	8.98717e+07	4.10705e+07
					5000000	0.12	4.1e+06	8500000	2.2386e+07	2.457e+06	2.4843e+07	1.911e+07	6.1992e+06	10000000	700000	49542200	9.14382e+07	4.1896e+07
					0	0	0	0	0	0	0	0	0	11000000	770000	11000000	0	-11000000
					100000	0.00218182	93781.8	170000	512049	16975.6	529024	406942	141798	11000000	770000	1.18408e+07	2.09152e+06	-9.7493e+06
					200000	0.00436364	187127	340000	1.02171e+06	35142.5	1.05686e+06	812967	282936	11000000	770000	1.26798e+07	4.17331e+06	-8.50648e+06
					300000	0.00654545	280036	510000	1.529e+06	54500.7	1.5835e+06	1.21808e+06	423415	11000000	770000	1.35169e+07	6.24537e+06	-7.27154e+06
					400000	0.00872727	372509	680000	2.0339e+06	75050.2	2.10895e+06	1.62227e+06	563234	11000000	770000	1.43522e+07	8.3077e+06	-6.04449e+06
					500000	0.0109091	464545	850000	2.53642e+06	96790.9	2.63321e+06	2.02555e+06	702393	11000000	770000	1.51856e+07	1.03603e+07	-4.82531e+06
					600000	0.0130909	556145	1020000	3.03655e+06	119723	3.15628e+06	2.42791e+06	840892	11000000	770000	1.60172e+07	1.24032e+07	-3.61401e+06
					700000	0.0152727	647309	1190000	3.53431e+06	143846	3.67815e+06	2.82935e+06	978731	11000000	770000	1.68469e+07	1.44363e+07	-2.4106e+06
					800000	0.0174545	738036	1360000	4.02968e+06	169161	4.19884e+06	3.22988e+06	1.11591e+06	11000000	770000	1.76748e+07	1.64597e+07	-1.21506e+06
					900000	0.0196364	828327	1530000	4.52267e+06	195667	4.71833e+06	3.62949e+06	1.25243e+06	11000000	770000	1.85008e+07	1.84734e+07	-27409.5
					1000000	0.0218182	918182	1700000	5.01327e+06	223364	5.23664e+06	4.02818e+06	1.38829e+06	11000000	770000	1.93249e+07	2.04773e+07	1.15236e+06
					1100000	0.024	1.0076e+06	1870000	5.5015e+06	252252	5.75375e+06	4.42596e+06	1.52349e+06	11000000	770000	2.01472e+07	2.24715e+07	2.32426e+06
					1200000	0.0261818	1.09658e+06	2040000	5.98734e+06	282332	6.26967e+06	4.82282e+06	1.65803e+06	11000000	770000	2.09677e+07	2.4456e+07	3.48827e+06
					1300000	0.0283636	1.18513e+06	2210000	6.47079e+06	313603	6.7844e+06	5.21877e+06	1.79191e+06	11000000	770000	2.17863e+07	2.64307e+07	4.6444e+06
					1400000	0.0305455	1.27324e+06	2380000	6.95187e+06	346065	7.29794e+06	5.6138e+06	1.92513e+06	11000000	770000	2.26031e+07	2.83957e+07	5.79265e+06
					1500000	0.0327273	1.36091e+06	2550000	7.43056e+06	379718	7.81028e+06	6.00791e+06	2.05769e+06	11000000	770000	2.3418e+07	3.0351e+07	6.93302e+06
					1600000	0.0349091	1.44815e+06	2720000	7.90687e+06	414563	8.32144e+06	6.40111e+06	2.1896e+06	11000000	770000	2.4231e+07	3.22965e+07	8.06551e+06
					1700000	0.0370909	1.53495e+06	2890000	8.3808e+06	450599	8.8314e+06	6.79339e+06	2.32084e+06	11000000	770000	2.50422e+07	3.42324e+07	9.19011e+06
					1800000	0.0392727	1.62131e+06	3060000	8.85235e+06	487826	9.34017e+06	7.18475e+06	2.45142e+06	11000000	770000	2.58516e+07	3.61584e+07	1.03068e+07
					1900000	0.0414545	1.70724e+06	3230000	9.32151e+06	526245	9.84776e+06	7.5752e+06	2.58134e+06	11000000	770000	2.66591e+07	3.80748e+07	1.14157e+07
					2000000	0.0436364	1.79273e+06	3400000	9.78829e+06	565855	1.03541e+07	7.96473e+06	2.7106e+06	11000000	770000	2.74647e+07	3.99814e+07	1.25167e+07
					2100000	0.0458182	1.87778e+06	3570000	1.02527e+07	606656	1.08593e+07	8.35334e+06	2.83921e+06	11000000	770000	2.82686e+07	4.18783e+07	1.36097e+07
					2200000	0.048	1.9624e+06	3740000	1.07147e+07	648648	1.13634e+07	8.74104e+06	2.96715e+06	11000000	770000	2.90705e+07	4.37654e+07	1.46949e+07
					2300000	0.0501818	2.04658e+06	3910000	1.11743e+07	691832	1.18662e+07	9.12782e+06	3.09443e+06	11000000	770000	2.98706e+07	4.56429e+07	1.57723e+07
					2400000	0.0523636	2.13033e+06	4080000	1.16316e+07	736207	1.23678e+07	9.51369e+06	3.22105e+06	11000000	770000	3.06688e+07	4.75106e+07	1.68417e+07
					2500000	0.0545455	2.21364e+06	4250000	1.20865e+07	781773	1.28682e+07	9.89864e+06	3.34702e+06	11000000	770000	3.14652e+07	4.93685e+07	1.79033e+07
					2600000	0.0567273	2.29651e+06	4420000	1.25389e+07	828530	1.33675e+07	1.02827e+07	3.47232e+06	11000000	770000	3.22598e+07	5.12167e+07	1.8957e+07
					2700000	0.0589091	2.37895e+06	4590000	1.2989e+07	876479	1.38655e+07	1.06658e+07	3.59697e+06	11000000	770000	3.30525e+07	5.30552e+07	2.00028e+07
					2800000	0.0610909	2.46095e+06	4760000	1.34368e+07	925619	1.43624e+07	1.1048e+07	3.72095e+06	11000000	770000	3.38433e+07	5.4884e+07	2.10407e+07
					2900000	0.0632727	2.54251e+06	4930000	1.38821e+07	975950	1.4858e+07	1.14293e+07	3.84427e+06	11000000	770000	3.46323e+07	5.6703e+07	2.20707e+07
					3000000	0.0654545	2.62364e+06	5100000	1.43251e+07	1.02747e+06	1.53525e+07	1.18096e+07	3.96694e+06	11000000	770000	3.54195e+07	5.85123e+07	2.30929e+07
					3100000	0.0676364	2.70433e+06	5270000	1.47656e+07	1.08019e+06	1.58458e+07	1.21891e+07	4.08894e+06	11000000	770000	3.62048e+07	6.03119e+07	2.41072e+07
					3200000	0.0698182	2.78458e+06	5440000	1.52038e+07	1.13409e+06	1.63379e+07	1.25676e+07	4.21029e+06	11000000	770000	3.69882e+07	6.21017e+07	2.51135e+07
					3300000	0.072	2864400	5610000	15639624	1189188	16828812	12945240	4.33097e+06	11000000	770000	3.77698e+07	6.38818e+07	2.61121e+07
					3400000	0.0741818	2.94378e+06	5780000	1.6073e+07	1.24548e+06	1.73185e+07	1.33219e+07	4.451e+06	11000000	770000	3.85495e+07	6.56522e+07	2.71027e+07
					3500000	0.0763636	3.02273e+06	5950000	1.65041e+07	1.30295e+06	1.7807e+07	1.36977e+07	4.57036e+06	11000000	770000	3.93274e+07	6.74129e+07	2.80855e+07
					3600000	0.0785455	3.10124e+06	6120000	1.69328e+07	1.36162e+06	1.82944e+07	1.40726e+07	4.68907e+06	11000000	770000	4.01034e+07	6.91638e+07	2.90603e+07
					3700000	0.0807273	3.17931e+06	6290000	1.7359e+07	1.42149e+06	1.87805e+07	1.44465e+07	4.80712e+06	11000000	770000	4.08776e+07	7.0905e+07	3.00273e+07
					3800000	0.0829091	3.25695e+06	6460000	1.77829e+07	1.48254e+06	1.92655e+07	1.48196e+07	4.9245e+06	11000000	770000	4.165e+07	7.26364e+07	3.09864e+07
					3900000	0.0850909	3.33415e+06	6630000	1.82044e+07	1.54478e+06	1.97492e+07	1.51917e+07	5.04123e+06	11000000	770000	4.24204e+07	7.43581e+07	3.19377e+07
					4000000	0.0872727	3.41091e+06	6800000	1.86236e+07	1.60822e+06	2.02318e+07	1.55629e+07	5.15729e+06	11000000	770000	4.31891e+07	7.60701e+07	3.2881e+07
					4100000	0.0894545	3.48724e+06	6970000	1.90403e+07	1.67284e+06	2.07132e+07	1.59332e+07	5.2727e+06	11000000	770000	4.39559e+07	7.77723e+07	3.38165e+07
					4200000	0.0916364	3.56313e+06	7140000	1.94547e+07	1.73866e+06	2.11933e+07	1.63026e+07	5.38745e+06	11000000	770000	4.47208e+07	7.94649e+07	3.47441e+07
					4300000	0.0938182	3.63858e+06	7310000	1.98667e+07	1.80567e+06	2.16723e+07	1.6671e+07	5.50154e+06	11000000	770000	4.54839e+07	8.11477e+07	3.56638e+07
					4400000	0.096	3713600	7480000	20276256	1873872	22150128	17038560	5.61496e+06	11000000	770000	4.62451e+07	8.28207e+07	36575616
					4500000	0.0981818	3.78818e+06	7650000	2.06835e+07	1.94326e+06	2.26267e+07	1.74052e+07	5.72773e+06	11000000	770000	4.70045e+07	8.4484e+07	3.74796e+07
					4600000	0.100364	3.86233e+06	7820000	2.10883e+07	2.01385e+06	2.31022e+07	1.77709e+07	5.83984e+06	11000000	770000	4.7762e+07	8.61376e+07	3.83756e+07
					4700000	0.102545	3.93604e+06	7990000	2.14908e+07	2.08562e+06	2.35764e+07	1.81357e+07	5.95129e+06	11000000	770000	4.85177e+07	8.77815e+07	3.92638e+07
					4800000	0.104727	4.00931e+06	8160000	2.18908e+07	2.15859e+06	2.40494e+07	1.84995e+07	6.06208e+06	11000000	770000	4.92715e+07	8.94156e+07	4.01441e+07
					4900000	0.106909	4.08215e+06	8330000	2.22885e+07	2.23274e+06	2.45213e+07	1.88625e+07	6.1722e+06	11000000	770000	5.00235e+07	9.104e+07	4.10165e+07
					5000000	0.109091	4.15455e+06	8500000	2.26838e+07	2.30809e+06	2.49919e+07	1.92245e+07	6.28167e+06	11000000	770000	5.07736e+07	9.26547e+07	4.18811e+07
					0	0	0	0	0	0	0	0	0	12000000	840000	12000000	0	-12000000
					100000	0.002	93800	170000	512148	16926	529074	406980	141826	12000000	840000	1.28409e+07	2.09193e+06	-10748972
					200000	0.004	187200	340000	1022112	34944	1057056	813120	283046	12000000	840000	1.36801e+07	4.17493e+06	-9505168
					300000	0.006	280200	510000	1529892	54054	1583946	1218420	423662	12000000	840000	1.45176e+07	6.24902e+06	-8268588
					400000	0.008	372800	680000	2035488	74256	2109744	1622880	563674	12000000	840000	1.53534e+07	8.31419e+06	-7.03923e+06
					500000	0.01	465000	850000	2.5389e+06	95550	2.63445e+06	2.0265e+06	703080	12000000	840000	16187530	10370430	-5817100
					600000	0.012	556800	1020000	3040128	117936	3158064	2429280	841882	12000000	840000	1.70199e+07	1.24178e+07	-4602192
					700000	0.014	648200	1190000	3539172	141414	3680586	2831220	980078	12000000	840000	1.78507e+07	1.44562e+07	-3.39451e+06
					800000	0.016	739200	1360000	4036032	165984	4202016	3232320	1.11767e+06	12000000	840000	1.86797e+07	1.64856e+07	-2.19405e+06
					900000	0.018	829800	1530000	4530708	191646	4722354	3632580	1.25466e+06	12000000	840000	1.9507e+07	1.85062e+07	-1.00081e+06
					1000000	0.02	920000	1700000	5.0232e+06	218400	5.2416e+06	4.032e+06	1391040	12000000	840000	20332640	20517840	185200
					1100000	0.022	1.0098e+06	1870000	5.51351e+06	246246	5.75975e+06	4.43058e+06	1.52682e+06	12000000	840000	2.11566e+07	2.25206e+07	1.36399e+06
					1200000	0.024	1099200	2040000	6001632	275184	6276816	4828320	1.66199e+06	12000000	840000	2.19788e+07	2.45144e+07	2.53555e+06
					1300000	0.026	1188200	2210000	6487572	305214	6792786	5225220	1.79656e+06	12000000	840000	2.27993e+07	2.64992e+07	3.69989e+06
					1400000	0.028	1276800	2380000	6971328	336336	7307664	5621280	1.93052e+06	12000000	840000	2.36182e+07	2.84752e+07	4857008
					1500000	0.03	1.365e+06	2550000	7.4529e+06	368550	7821450	6016500	2.06388e+06	12000000	840000	24435330	3.04422e+07	6.0069e+06
					1600000	0.032	1.4528e+06	2720000	7.93229e+06	401856	8334144	6410880	2.19663e+06	12000000	840000	2.52508e+07	3.24003e+07	7.14957e+06
					1700000	0.034	1.5402e+06	2890000	8409492	436254	8845746	6804420	2.32878e+06	12000000	840000	2.60645e+07	3.43495e+07	8285012
					1800000	0.036	1.6272e+06	3060000	8884512	471744	9356256	7197120	2.46033e+06	12000000	840000	2.68766e+07	3.62898e+07	9413232
					1900000	0.038	1.7138e+06	3230000	9357348	508326	9865674	7588980	2.59127e+06	12000000	840000	2.76869e+07	3.82212e+07	1.05342e+07
					2000000	0.04	1.8e+06	3400000	9.828e+06	546000	1.0374e+07	7.98e+06	2721600	12000000	840000	28495600	40143600	11648000
					2100000	0.042	1.8858e+06	3570000	1.02965e+07	584766	1.08812e+07	8.37018e+06	2.85133e+06	12000000	840000	2.93026e+07	4.20571e+07	1.27545e+07
					2200000	0.044	1.9712e+06	3740000	1.07628e+07	624624	1.13874e+07	8.75952e+06	2.98045e+06	12000000	840000	3.01078e+07	4.39617e+07	1.38539e+07
					2300000	0.046	2.0562e+06	3910000	1.12269e+07	665574	1.18924e+07	9.14802e+06	3.10897e+06	12000000	840000	3.09114e+07	4.58574e+07	1.4946e+07
					2400000	0.048	2140800	4080000	11688768	707616	12396384	9535680	3.23689e+06	12000000	840000	3.17133e+07	4.77441e+07	16030848
					2500000	0.05	2.225e+06	4250000	1.21485e+07	750750	12899250	9922500	3.3642e+06	12000000	840000	32513450	4.96219e+07	1.71085e+07
					2600000	0.052	2.3088e+06	4420000	1.2606e+07	794976	13401024	10308480	3.49091e+06	12000000	840000	3.33119e+07	5.14909e+07	1.81789e+07
					2700000	0.054	2.3922e+06	4590000	1.30614e+07	840294	13901706	10693620	3.61701e+06	12000000	840000	3.41087e+07	5.33508e+07	1.92421e+07
					2800000	0.056	2.4752e+06	4760000	1.35146e+07	886704	14401296	11077920	3.7425e+06	12000000	840000	3.49038e+07	5.52019e+07	2.02981e+07
					2900000	0.058	2.5578e+06	4930000	1.39656e+07	934206	14899794	11461380	3.86739e+06	12000000	840000	3.56972e+07	5.70441e+07	21346868
					3000000	0.06	2.64e+06	5100000	1.44144e+07	982800	15397200	11844000	3.99168e+06	12000000	840000	36488880	5.88773e+07	2.23884e+07
					3100000	0.062	2.7218e+06	5270000	1.4861e+07	1.03249e+06	15893514	12225780	4.11536e+06	12000000	840000	3.72789e+07	6.07016e+07	23422708
					3200000	0.064	2.8032e+06	5440000	1.53055e+07	1.08326e+06	16388736	12606720	4.23844e+06	12000000	840000	3.80672e+07	6.2517e+07	2.44498e+07
					3300000	0.066	2.8842e+06	5610000	1.57477e+07	1.13513e+06	16882866	12986820	4.36091e+06	12000000	840000	3.88538e+07	6.43234e+07	2.54697e+07
					3400000	0.068	2.9648e+06	5780000	1.61878e+07	1.1881e+06	17375904	13366080	4.48278e+06	12000000	840000	3.96387e+07	6.6121e+07	2.64823e+07
					3500000	0.07	3.045e+06	5950000	1.66257e+07	1.24215e+06	17867850	13744500	4604040	12000000	840000	40421890	67909590	27487700
					3600000	0.072	3124800	6120000	17061408	1297296	18358704	14122080	4.7247e+06	12000000	840000	4.12034e+07	6.96893e+07	2.84859e+07
					3700000	0.074	3204200	6290000	17494932	1353534	18848466	14498820	4.84475e+06	12000000	840000	4.19832e+07	7.14601e+07	2.94769e+07
					3800000	0.076	3283200	6460000	17926272	1410864	19337136	14874720	4.9642e+06	12000000	840000	4.27613e+07	7.32219e+07	3.04606e+07
					3900000	0.078	3361800	6630000	18355428	1469286	19824714	15249780	5.08304e+06	12000000	840000	4.35378e+07	7.49749e+07	3.14371e+07
					4000000	0.08	3440000	6800000	18782400	1528800	20311200	15624000	5201280	12000000	840000	44312480	76718880	32406400
					4100000	0.082	3517800	6970000	19207188	1589406	20796594	15997380	5.31891e+06	12000000	840000	4.50855e+07	7.8454e+07	3.33685e+07
					4200000	0.084	3595200	7140000	19629792	1651104	21280896	16369920	5.43594e+06	12000000	840000	4.58568e+07	8.01802e+07	3.43233e+07
					4300000	0.086	3672200	7310000	20050212	1713894	21764106	16741620	5.55237e+06	12000000	840000	4.66265e+07	8.18974e+07	3.52709e+07
					4400000	0.088	3748800	7480000	20468448	1777776	22246224	17112480	5.66819e+06	12000000	840000	4.73944e+07	8.36057e+07	3.62113e+07
					4500000	0.09	3825000	7650000	20884500	1842750	22727250	17482500	5783400	12000000	840000	48160650	85305150	37144500
					4600000	0.092	3900800	7820000	21298368	1908816	23207184	17851680	5.89801e+06	12000000	840000	4.89252e+07	8.69956e+07	3.80704e+07
					4700000	0.094	3976200	7990000	21710052	1975974	23686026	18220020	6.01201e+06	12000000	840000	4.9688e+07	8.86772e+07	3.89892e+07
					4800000	0.096	4051200	8160000	22119552	2044224	24163776	18587520	6.12541e+06	12000000	840000	5.04492e+07	9.03499e+07	3.99007e+07
					4900000	0.098	4125800	8330000	22526868	2113566	24640434	18954180	6.23821e+06	12000000	840000	5.12086e+07	9.20136e+07	4.08049e+07
					5000000	0.1	4200000	8500000	22932000	2184000	25116000	19320000	6350400	12000000	840000	51966400	93668400	41702000

## Sheet: Sheet3
Juvenile numbers	Density dependent mortality	Adult numbers	Juveniles cost	Feed cost 1	Feed cost 2	Total feed cost	Total feed use	Harvest cost	Variable costs	Capacity	Total costs	Sales	Net earnings	Positive earnings
0	0	0	0	0	0	0	0	0	1000000	70000	1000000	0	-1000000	0
100000	0.024	91600	170000	500136	22932	523068	402360	138499	1000000	70000	1.83157e+06	2.04286e+06	211296	211296
200000	0.048	178400	340000	974064	58968	1033032	794640	269741	1000000	70000	2.64277e+06	3.97868e+06	1.3359e+06	1.3359e+06
300000	0.072	260400	510000	1.42178e+06	108108	1.52989e+06	1.17684e+06	393725	1000000	70000	3.43362e+06	5.80744e+06	2.37382e+06	2.37382e+06
400000	0.096	337600	680000	1843296	170352	2013648	1548960	510451	1000000	70000	4.2041e+06	7.52916e+06	3325056	3325056
500000	0.12	410000	850000	2238600	245700	2484300	1911000	619920	1000000	70000	4954220	9143820	4189600	4189600
600000	0.144	477600	1020000	2.6077e+06	334152	2.94185e+06	2.26296e+06	722131	1000000	70000	5.68398e+06	1.06514e+07	4.96746e+06	4.96746e+06
700000	0.168	540400	1190000	2.95058e+06	435708	3386292	2604840	817085	1000000	70000	6.39338e+06	1.2052e+07	5.65862e+06	5.65862e+06
800000	0.192	598400	1360000	3.26726e+06	550368	3817632	2936640	904781	1000000	70000	7.08241e+06	1.33455e+07	6.2631e+06	6.2631e+06
900000	0.216	651600	1530000	3.55774e+06	678132	4235868	3258360	985219	1000000	70000	7.75109e+06	1.4532e+07	6.7809e+06	6.7809e+06
1000000	0.24	700000	1700000	3822000	819000	4641000	3570000	1058400	1000000	70000	8399400	1.56114e+07	7.212e+06	7.212e+06
1100000	0.264	743600	1870000	4.06006e+06	972972	5033028	3871560	1.12432e+06	1000000	70000	9.02735e+06	1.65838e+07	7.55642e+06	7.55642e+06
1200000	0.288	782400	2040000	4271904	1.14005e+06	5411952	4163040	1.18299e+06	1000000	70000	9.63494e+06	1.74491e+07	7.81414e+06	7.81414e+06
1300000	0.312	816400	2210000	4457544	1.32023e+06	5777772	4444440	1.2344e+06	1000000	70000	1.02222e+07	1.82074e+07	7.98518e+06	7.98518e+06
1400000	0.336	845600	2380000	4.61698e+06	1.51351e+06	6.13049e+06	4.71576e+06	1.27855e+06	1000000	70000	1.0789e+07	1.88586e+07	8.06954e+06	8.06954e+06
1500000	0.36	870000	2550000	4.7502e+06	1.7199e+06	6.4701e+06	4.977e+06	1.31544e+06	1000000	70000	11335540	1.94027e+07	8.0672e+06	8.0672e+06
1600000	0.384	889600	2720000	4.85722e+06	1.93939e+06	6.79661e+06	5.22816e+06	1.34508e+06	1000000	70000	1.18617e+07	1.98399e+07	7.97818e+06	7.97818e+06
1700000	0.408	904400	2890000	4.93802e+06	2.17199e+06	7110012	5469240	1.36745e+06	1000000	70000	1.23675e+07	2.01699e+07	7.80246e+06	7.80246e+06
1800000	0.432	914400	3060000	4.99262e+06	2.41769e+06	7.41031e+06	5.70024e+06	1.38257e+06	1000000	70000	1.28529e+07	2.03929e+07	7.54006e+06	7.54006e+06
1900000	0.456	919600	3230000	5.02102e+06	2.67649e+06	7.69751e+06	5.92116e+06	1.39044e+06	1000000	70000	1.33179e+07	2.05089e+07	7.19098e+06	7.19098e+06
2000000	0.48	920000	3400000	5.0232e+06	2.9484e+06	7971600	6132000	1.39104e+06	1000000	70000	13762640	2.05178e+07	6.7552e+06	6.7552e+06
2100000	0.504	915600	3570000	4.99918e+06	3.23341e+06	8232588	6332760	1.38439e+06	1000000	70000	1.4187e+07	2.04197e+07	6.23274e+06	6.23274e+06
2200000	0.528	906400	3740000	4.94894e+06	3531528	8480472	6523440	1.37048e+06	1000000	70000	1.45909e+07	2.02145e+07	5.62358e+06	5.62358e+06
2300000	0.552	892400	3910000	4.8725e+06	3.84275e+06	8715252	6704040	1.34931e+06	1000000	70000	1.49746e+07	1.99023e+07	4.92774e+06	4.92774e+06
2400000	0.576	873600	4080000	4.76986e+06	4.16707e+06	8936928	6874560	1.32088e+06	1000000	70000	1.53378e+07	1.9483e+07	4.14522e+06	4.14522e+06
2500000	0.6	850000	4250000	4.641e+06	4.5045e+06	9145500	7035000	1.2852e+06	1000000	70000	15680700	1.89567e+07	3.276e+06	3.276e+06
2600000	0.624	821600	4420000	4.48594e+06	4.85503e+06	9.34097e+06	7.18536e+06	1.24226e+06	1000000	70000	1.60032e+07	1.83233e+07	2.3201e+06	2.3201e+06
2700000	0.648	788400	4590000	4.30466e+06	5.21867e+06	9523332	7325640	1.19206e+06	1000000	70000	1.63054e+07	1.75829e+07	1.2775e+06	1.2775e+06
2800000	0.672	750400	4760000	4.09718e+06	5.59541e+06	9692592	7455840	1.1346e+06	1000000	70000	1.65872e+07	1.67354e+07	148224	148224
2900000	0.696	707600	4930000	3.8635e+06	5.98525e+06	9848748	7575960	1.06989e+06	1000000	70000	1.68486e+07	1.57809e+07	-1.06774e+06	0
3000000	0.72	660000	5100000	3.6036e+06	6.3882e+06	9991800	7686000	997920	1000000	70000	17089720	1.47193e+07	-2.3704e+06	0
3100000	0.744	607600	5270000	3.3175e+06	6.80425e+06	10121748	7785960	918691	1000000	70000	1.73104e+07	1.35507e+07	-3.75974e+06	0
3200000	0.768	550400	5440000	3.00518e+06	7.23341e+06	1.02386e+07	7.87584e+06	832205	1000000	70000	1.75108e+07	1.2275e+07	-5.23578e+06	0
3300000	0.792	488400	5610000	2.66666e+06	7.67567e+06	1.03423e+07	7.95564e+06	738461	1000000	70000	1.76908e+07	1.08923e+07	-6.7985e+06	0
3400000	0.816	421600	5780000	2.30194e+06	8.13103e+06	10432968	8025360	637459	1000000	70000	1.78504e+07	9.40252e+06	-8.4479e+06	0
3500000	0.84	350000	5950000	1.911e+06	8.5995e+06	10510500	8085000	529200	1000000	70000	17989700	7.8057e+06	-1.0184e+07	0
3600000	0.864	273600	6120000	1.49386e+06	9.08107e+06	1.05749e+07	8.13456e+06	413683	1000000	70000	1.81086e+07	6.10183e+06	-1.20068e+07	0
3700000	0.888	192400	6290000	1.0505e+06	9.57575e+06	1.06263e+07	8.17404e+06	290909	1000000	70000	1.82072e+07	4.2909e+06	-1.39163e+07	0
3800000	0.912	106400	6460000	580944	1.00835e+07	1.06645e+07	8.20344e+06	160877	1000000	70000	1.82853e+07	2.37293e+06	-1.59124e+07	0
3900000	0.936	15600	6630000	85176	1.06044e+07	1.06896e+07	8.22276e+06	23587.2	1000000	70000	1.83432e+07	347911	-1.79953e+07	0
4000000	0.96	-80000	6800000	-436800	1.11384e+07	1.07016e+07	8.232e+06	-120960	1000000	70000	1.83806e+07	-1.78416e+06	-2.01648e+07	0
4100000	0.984	-180400	6970000	-984984	1.16855e+07	10700508	8231160	-272765	1000000	70000	1.83977e+07	-4.02328e+06	-2.2421e+07	0
4200000	1.008	-285600	7140000	-1.55938e+06	1.22457e+07	1.06863e+07	8.22024e+06	-431827	1000000	70000	1.83945e+07	-6.36945e+06	-2.47639e+07	0
4300000	1.032	-395600	7310000	-2.15998e+06	1.2819e+07	1.0659e+07	8.19924e+06	-598147	1000000	70000	1.83709e+07	-8.82267e+06	-2.71935e+07	0
4400000	1.056	-510400	7480000	-2.78678e+06	13405392	1.06186e+07	8.16816e+06	-771725	1000000	70000	1.83269e+07	-1.13829e+07	-2.97098e+07	0
4500000	1.08	-630000	7650000	-3.4398e+06	1.40049e+07	1.05651e+07	8.127e+06	-952560	1000000	70000	1.82625e+07	-1.40503e+07	-3.23128e+07	0
4600000	1.104	-754400	7820000	-4.11902e+06	1.46175e+07	10498488	8075760	-1.14065e+06	1000000	70000	1.81778e+07	-1.68246e+07	-3.50025e+07	0
4700000	1.128	-883600	7990000	-4.82446e+06	1.52432e+07	10418772	8014440	-1.336e+06	1000000	70000	1.80728e+07	-1.9706e+07	-3.77788e+07	0
4800000	1.152	-1.0176e+06	8160000	-5.5561e+06	1.5882e+07	10325952	7943040	-1.53861e+06	1000000	70000	1.79473e+07	-2.26945e+07	-4.06419e+07	0
4900000	1.176	-1.1564e+06	8330000	-6.31394e+06	1.6534e+07	10220028	7861560	-1.74848e+06	1000000	70000	1.78016e+07	-2.579e+07	-4.35916e+07	0
5000000	1.2	-1.3e+06	8500000	-7.098e+06	1.7199e+07	1.0101e+07	7.77e+06	-1.9656e+06	1000000	70000	1.76354e+07	-2.89926e+07	-4.6628e+07	0
0	0	0	0	0	0	0	0	0	2000000	140000	2000000	0	-2000000	0
100000	0.012	92800	170000	506688	19656	526344	404880	140314	2000000	140000	2.83666e+06	2.06963e+06	-767032	0
200000	0.024	183200	340000	1.00027e+06	45864	1046136	804720	276998	2000000	140000	3.66313e+06	4.08573e+06	422592	422592
300000	0.036	271200	510000	1480752	78624	1559376	1199520	410054	2000000	140000	4.47943e+06	6.0483e+06	1568872	1568872
400000	0.048	356800	680000	1.94813e+06	117936	2066064	1589280	539482	2000000	140000	5.28555e+06	7.95735e+06	2.67181e+06	2.67181e+06
500000	0.06	440000	850000	2402400	163800	2566200	1974000	665280	2000000	140000	6081480	9812880	3731400	3731400
600000	0.072	520800	1020000	2.84357e+06	216216	3.05978e+06	2.35368e+06	787450	2000000	140000	6.86723e+06	1.16149e+07	4.74765e+06	4.74765e+06
700000	0.084	599200	1190000	3.27163e+06	275184	3546816	2728320	905990	2000000	140000	7.64281e+06	1.33634e+07	5.72055e+06	5.72055e+06
800000	0.096	675200	1360000	3686592	340704	4027296	3097920	1.0209e+06	2000000	140000	8.4082e+06	1.50583e+07	6650112	6650112
900000	0.108	748800	1530000	4088448	412776	4501224	3462480	1.13219e+06	2000000	140000	9.16341e+06	1.66997e+07	7.53633e+06	7.53633e+06
1000000	0.12	820000	1700000	4477200	491400	4968600	3822000	1239840	2000000	140000	9908440	18287640	8379200	8379200
1100000	0.132	888800	1870000	4852848	576576	5429424	4176480	1.34387e+06	2000000	140000	1.06433e+07	1.9822e+07	9.17873e+06	9.17873e+06
1200000	0.144	955200	2040000	5.21539e+06	668304	5.8837e+06	4.52592e+06	1.44426e+06	2000000	140000	1.1368e+07	2.13029e+07	9.93491e+06	9.93491e+06
1300000	0.156	1.0192e+06	2210000	5.56483e+06	766584	6.33142e+06	4.87032e+06	1.54103e+06	2000000	140000	1.20824e+07	2.27302e+07	1.06478e+07	1.06478e+07
1400000	0.168	1.0808e+06	2380000	5.90117e+06	871416	6772584	5209680	1.63417e+06	2000000	140000	1.27868e+07	2.4104e+07	1.13172e+07	1.13172e+07
1500000	0.18	1.14e+06	2550000	6.2244e+06	982800	7207200	5544000	1.72368e+06	2000000	140000	13480880	2.54243e+07	1.19434e+07	1.19434e+07
1600000	0.192	1.1968e+06	2720000	6.53453e+06	1.10074e+06	7635264	5873280	1.80956e+06	2000000	140000	1.41648e+07	2.6691e+07	1.25262e+07	1.25262e+07
1700000	0.204	1251200	2890000	6831552	1225224	8056776	6197520	1.89181e+06	2000000	140000	1.48386e+07	2.79043e+07	1.30657e+07	1.30657e+07
1800000	0.216	1.3032e+06	3060000	7.11547e+06	1.35626e+06	8471736	6516720	1.97044e+06	2000000	140000	1.55022e+07	2.9064e+07	1.35618e+07	1.35618e+07
1900000	0.228	1352800	3230000	7386288	1493856	8880144	6830880	2.04543e+06	2000000	140000	1.61556e+07	3.01701e+07	1.40146e+07	1.40146e+07
2000000	0.24	1400000	3400000	7644000	1638000	9282000	7140000	2116800	2000000	140000	16798800	3.12228e+07	1.4424e+07	1.4424e+07
2100000	0.252	1444800	3570000	7888608	1788696	9677304	7444080	2.18454e+06	2000000	140000	1.74318e+07	3.22219e+07	14790088	14790088
2200000	0.264	1.4872e+06	3740000	8.12011e+06	1.94594e+06	10066056	7743120	2.24865e+06	2000000	140000	1.80547e+07	3.31675e+07	1.51128e+07	1.51128e+07
2300000	0.276	1.5272e+06	3910000	8.33851e+06	2.10974e+06	10448256	8037120	2.30913e+06	2000000	140000	1.86674e+07	3.40596e+07	15392232	15392232
2400000	0.288	1.5648e+06	4080000	8543808	2.2801e+06	10823904	8326080	2.36598e+06	2000000	140000	1.92699e+07	3.48982e+07	1.56283e+07	1.56283e+07
2500000	0.3	1.6e+06	4250000	8736000	2.457e+06	11193000	8610000	2419200	2000000	140000	19862200	35683200	15821000	15821000
2600000	0.312	1.6328e+06	4420000	8915088	2.64046e+06	11555544	8888880	2.46879e+06	2000000	140000	2.04443e+07	3.64147e+07	1.59704e+07	1.59704e+07
2700000	0.324	1.6632e+06	4590000	9081072	2.83046e+06	11911536	9162720	2.51476e+06	2000000	140000	2.10163e+07	3.70927e+07	16076392	16076392
2800000	0.336	1.6912e+06	4760000	9.23395e+06	3.02702e+06	1.2261e+07	9.43152e+06	2.55709e+06	2000000	140000	2.15781e+07	3.77171e+07	1.61391e+07	1.61391e+07
2900000	0.348	1.7168e+06	4930000	9.37373e+06	3.23014e+06	1.26039e+07	9.69528e+06	2.5958e+06	2000000	140000	2.21297e+07	3.82881e+07	1.61584e+07	1.61584e+07
3000000	0.36	1.74e+06	5100000	9.5004e+06	3.4398e+06	1.29402e+07	9.954e+06	2.63088e+06	2000000	140000	22671080	3.88055e+07	1.61344e+07	1.61344e+07
3100000	0.372	1.7608e+06	5270000	9.61397e+06	3.65602e+06	1.327e+07	1.02077e+07	2.66233e+06	2000000	140000	2.32023e+07	3.92694e+07	1.6067e+07	1.6067e+07
3200000	0.384	1.7792e+06	5440000	9.71443e+06	3.87878e+06	1.35932e+07	1.04563e+07	2.69015e+06	2000000	140000	2.37234e+07	3.96797e+07	1.59564e+07	1.59564e+07
3300000	0.396	1.7952e+06	5610000	9.80179e+06	4.1081e+06	1.39099e+07	1.06999e+07	2.71434e+06	2000000	140000	2.42342e+07	4.00366e+07	1.58023e+07	1.58023e+07
3400000	0.408	1.8088e+06	5780000	9.87605e+06	4.34398e+06	14220024	10938480	2.73491e+06	2000000	140000	2.47349e+07	4.03399e+07	1.56049e+07	1.56049e+07
3500000	0.42	1.82e+06	5950000	9.9372e+06	4.5864e+06	14523600	11172000	2751840	2000000	140000	25225440	40589640	15364200	15364200
3600000	0.432	1.8288e+06	6120000	9.98525e+06	4.83538e+06	1.48206e+07	1.14005e+07	2.76515e+06	2000000	140000	2.57058e+07	4.07859e+07	1.50801e+07	1.50801e+07
3700000	0.444	1.8352e+06	6290000	1.00202e+07	5.0909e+06	1.51111e+07	1.16239e+07	2.77482e+06	2000000	140000	2.61759e+07	4.09286e+07	1.47527e+07	1.47527e+07
3800000	0.456	1.8392e+06	6460000	1.0042e+07	5.35298e+06	1.5395e+07	1.18423e+07	2.78087e+06	2000000	140000	2.66359e+07	4.10178e+07	1.4382e+07	1.4382e+07
3900000	0.468	1.8408e+06	6630000	1.00508e+07	5.62162e+06	1.56724e+07	1.20557e+07	2.78329e+06	2000000	140000	2.70857e+07	4.10535e+07	1.39678e+07	1.39678e+07
4000000	0.48	1.84e+06	6800000	1.00464e+07	5.8968e+06	15943200	12264000	2.78208e+06	2000000	140000	27525280	4.10357e+07	1.35104e+07	1.35104e+07
4100000	0.492	1.8368e+06	6970000	1.00289e+07	6.17854e+06	1.62075e+07	1.24673e+07	2.77724e+06	2000000	140000	2.79547e+07	4.09643e+07	1.30096e+07	1.30096e+07
4200000	0.504	1.8312e+06	7140000	9.99835e+06	6.46682e+06	16465176	12665520	2.76877e+06	2000000	140000	2.8374e+07	4.08394e+07	1.24655e+07	1.24655e+07
4300000	0.516	1.8232e+06	7310000	9.95467e+06	6.76166e+06	16716336	12858720	2.75668e+06	2000000	140000	2.8783e+07	4.0661e+07	1.1878e+07	1.1878e+07
4400000	0.528	1.8128e+06	7480000	9.89789e+06	7063056	16960944	13046880	2.74095e+06	2000000	140000	2.91819e+07	4.04291e+07	1.12472e+07	1.12472e+07
4500000	0.54	1.8e+06	7650000	9.828e+06	7.371e+06	1.7199e+07	1.323e+07	2.7216e+06	2000000	140000	2.95706e+07	4.01436e+07	1.0573e+07	1.0573e+07
4600000	0.552	1.7848e+06	7820000	9.74501e+06	7.6855e+06	17430504	13408080	2.69862e+06	2000000	140000	2.99491e+07	3.98046e+07	9.85549e+06	9.85549e+06
4700000	0.564	1.7672e+06	7990000	9.64891e+06	8.00654e+06	17655456	13581120	2.67201e+06	2000000	140000	3.03175e+07	3.94121e+07	9.09463e+06	9.09463e+06
4800000	0.576	1.7472e+06	8160000	9.53971e+06	8.33414e+06	17873856	13749120	2.64177e+06	2000000	140000	3.06756e+07	3.89661e+07	8.29043e+06	8.29043e+06
4900000	0.588	1.7248e+06	8330000	9.41741e+06	8.6683e+06	18085704	13912080	2.6079e+06	2000000	140000	3.10236e+07	3.84665e+07	7.44289e+06	7.44289e+06
5000000	0.6	1.7e+06	8500000	9.282e+06	9.009e+06	18291000	14070000	2.5704e+06	2000000	140000	31361400	3.79134e+07	6.552e+06	6.552e+06
0	0	0	0	0	0	0	0	0	3000000	210000	3000000	0	-3000000	0
100000	0.008	93200	170000	508872	18564	527436	405720	140918	3000000	210000	3.83835e+06	2.07855e+06	-1.75981e+06	0
200000	0.016	184800	340000	1009008	41496	1050504	808080	279418	3000000	210000	4.66992e+06	4.12141e+06	-548512	0
300000	0.024	274800	510000	1500408	68796	1569204	1207080	415498	3000000	210000	5.4947e+06	6.12859e+06	633888	633888
400000	0.032	363200	680000	1.98307e+06	100464	2083536	1602720	549158	3000000	210000	6.31269e+06	8.10009e+06	1.78739e+06	1.78739e+06
500000	0.04	450000	850000	2.457e+06	136500	2.5935e+06	1.995e+06	680400	3000000	210000	7123900	10035900	2912000	2912000
600000	0.048	535200	1020000	2922192	176904	3099096	2383920	809222	3000000	210000	7.92832e+06	1.1936e+07	4007712	4007712
700000	0.056	618800	1190000	3.37865e+06	221676	3600324	2769480	935626	3000000	210000	8.72595e+06	1.38005e+07	5.07453e+06	5.07453e+06
800000	0.064	700800	1360000	3.82637e+06	270816	4097184	3151680	1.05961e+06	3000000	210000	9.51679e+06	1.56292e+07	6.11245e+06	6.11245e+06
900000	0.072	781200	1530000	4265352	324324	4589676	3530520	1.18117e+06	3000000	210000	1.03009e+07	1.74223e+07	7.12147e+06	7.12147e+06
1000000	0.08	860000	1700000	4695600	382200	5077800	3906000	1300320	3000000	210000	11078120	19179720	8101600	8101600
1100000	0.088	937200	1870000	5117112	444444	5561556	4278120	1.41705e+06	3000000	210000	1.18486e+07	2.09014e+07	9.05283e+06	9.05283e+06
1200000	0.096	1012800	2040000	5529888	511056	6040944	4646880	1.53135e+06	3000000	210000	1.26123e+07	2.25875e+07	9.97517e+06	9.97517e+06
1300000	0.104	1086800	2210000	5933928	582036	6515964	5012280	1.64324e+06	3000000	210000	1.33692e+07	2.42378e+07	1.08686e+07	1.08686e+07
1400000	0.112	1159200	2380000	6329232	657384	6986616	5374320	1.75271e+06	3000000	210000	1.41193e+07	2.58525e+07	1.17332e+07	1.17332e+07
1500000	0.12	1230000	2550000	6715800	737100	7452900	5733000	1859760	3000000	210000	14862660	27431460	12568800	12568800
1600000	0.128	1299200	2720000	7093632	821184	7914816	6088320	1.96439e+06	3000000	210000	1.55992e+07	2.89748e+07	1.33756e+07	1.33756e+07
1700000	0.136	1366800	2890000	7462728	909636	8372364	6440280	2.0666e+06	3000000	210000	1.6329e+07	3.04824e+07	1.41534e+07	1.41534e+07
1800000	0.144	1.4328e+06	3060000	7.82309e+06	1.00246e+06	8825544	6788880	2.16639e+06	3000000	210000	1.70519e+07	3.19543e+07	1.49024e+07	1.49024e+07
1900000	0.152	1.4972e+06	3230000	8.17471e+06	1.09964e+06	9274356	7134120	2.26377e+06	3000000	210000	1.77681e+07	3.33906e+07	1.56224e+07	1.56224e+07
2000000	0.16	1.56e+06	3400000	8517600	1.2012e+06	9718800	7476000	2358720	3000000	210000	18477520	34791120	16313600	16313600
2100000	0.168	1621200	3570000	8851752	1307124	10158876	7814520	2.45125e+06	3000000	210000	1.91801e+07	3.6156e+07	16975872	16975872
2200000	0.176	1680800	3740000	9177168	1417416	10594584	8149680	2.54137e+06	3000000	210000	1.9876e+07	3.74852e+07	17609248	17609248
2300000	0.184	1738800	3910000	9493848	1532076	11025924	8481480	2.62907e+06	3000000	210000	2.0565e+07	3.87787e+07	18213728	18213728
2400000	0.192	1795200	4080000	9801792	1651104	11452896	8809920	2.71434e+06	3000000	210000	2.12472e+07	4.00366e+07	1.87893e+07	1.87893e+07
2500000	0.2	1850000	4250000	10101000	1774500	11875500	9135000	2797200	3000000	210000	21922700	41258700	19336000	19336000
2600000	0.208	1903200	4420000	10391472	1902264	12293736	9456720	2.87764e+06	3000000	210000	2.25914e+07	4.24452e+07	1.98538e+07	1.98538e+07
2700000	0.216	1954800	4590000	10673208	2034396	12707604	9775080	2.95566e+06	3000000	210000	2.32533e+07	4.35959e+07	20342688	20342688
2800000	0.224	2004800	4760000	10946208	2170896	13117104	10090080	3.03126e+06	3000000	210000	2.39084e+07	4.4711e+07	20802688	20802688
2900000	0.232	2053200	4930000	11210472	2311764	13522236	10401720	3.10444e+06	3000000	210000	2.45567e+07	4.57905e+07	2.12338e+07	2.12338e+07
3000000	0.24	2100000	5100000	11466000	2457000	13923000	10710000	3175200	3000000	210000	25198200	46834200	21636000	21636000
3100000	0.248	2145200	5270000	11712792	2606604	14319396	11014920	3.24354e+06	3000000	210000	2.58329e+07	4.78423e+07	2.20093e+07	2.20093e+07
3200000	0.256	2188800	5440000	11950848	2760576	14711424	11316480	3.30947e+06	3000000	210000	2.64609e+07	4.88146e+07	22353728	22353728
3300000	0.264	2230800	5610000	12180168	2918916	15099084	11614680	3.37297e+06	3000000	210000	2.70821e+07	4.97513e+07	22669248	22669248
3400000	0.272	2.2712e+06	5780000	1.24008e+07	3.08162e+06	15482376	11909520	3.43405e+06	3000000	210000	2.76964e+07	5.06523e+07	2.29559e+07	2.29559e+07
3500000	0.28	2.31e+06	5950000	1.26126e+07	3.2487e+06	15861300	12201000	3.49272e+06	3000000	210000	28304020	5.15176e+07	2.32136e+07	2.32136e+07
3600000	0.288	2.3472e+06	6120000	1.28157e+07	3.42014e+06	16235856	12489120	3.54897e+06	3000000	210000	2.89048e+07	5.23473e+07	2.34424e+07	2.34424e+07
3700000	0.296	2.3828e+06	6290000	1.30101e+07	3.59596e+06	16606044	12773880	3.60279e+06	3000000	210000	2.94988e+07	5.31412e+07	2.36424e+07	2.36424e+07
3800000	0.304	2.4168e+06	6460000	1.31957e+07	3.77614e+06	16971864	13055280	3.6542e+06	3000000	210000	3.00861e+07	5.38995e+07	2.38134e+07	2.38134e+07
3900000	0.312	2.4492e+06	6630000	1.33726e+07	3.96068e+06	17333316	13333320	3.70319e+06	3000000	210000	3.06665e+07	5.46221e+07	2.39556e+07	2.39556e+07
4000000	0.32	2.48e+06	6800000	1.35408e+07	4.1496e+06	17690400	13608000	3.74976e+06	3000000	210000	31240160	5.5309e+07	2.40688e+07	2.40688e+07
4100000	0.328	2.5092e+06	6970000	1.37002e+07	4.34288e+06	18043116	13879320	3.79391e+06	3000000	210000	3.1807e+07	5.59602e+07	2.41532e+07	2.41532e+07
4200000	0.336	2536800	7140000	13850928	4540536	18391464	14147280	3.83564e+06	3000000	210000	3.23671e+07	5.65757e+07	24208608	24208608
4300000	0.344	2.5628e+06	7310000	1.39929e+07	4.74256e+06	18735444	14411880	3.87495e+06	3000000	210000	3.29204e+07	5.71556e+07	2.42352e+07	2.42352e+07
4400000	0.352	2587200	7480000	14126112	4948944	19075056	14673120	3.91185e+06	3000000	210000	3.34669e+07	5.76997e+07	2.42328e+07	2.42328e+07
4500000	0.36	2.61e+06	7650000	1.42506e+07	5.1597e+06	19410300	14931000	3.94632e+06	3000000	210000	34006620	5.82082e+07	2.42016e+07	2.42016e+07
4600000	0.368	2631200	7820000	14366352	5374824	19741176	15185520	3.97837e+06	3000000	210000	3.45396e+07	5.8681e+07	2.41415e+07	2.41415e+07
4700000	0.376	2.6508e+06	7990000	1.44734e+07	5.59432e+06	2.00677e+07	1.54367e+07	4.00801e+06	3000000	210000	3.50657e+07	5.91181e+07	2.40524e+07	2.40524e+07
4800000	0.384	2.6688e+06	8160000	1.45716e+07	5.81818e+06	20389824	15684480	4.03523e+06	3000000	210000	3.5585e+07	5.95196e+07	23934528	23934528
4900000	0.392	2685200	8330000	14661192	6046404	20707596	15928920	4.06002e+06	3000000	210000	3.60976e+07	5.98853e+07	2.37877e+07	2.37877e+07
5000000	0.4	2.7e+06	8500000	1.4742e+07	6.279e+06	21021000	16170000	4.0824e+06	3000000	210000	36603400	6.02154e+07	2.3612e+07	2.3612e+07
0	0	0	0	0	0	0	0	0	4000000	280000	4000000	0	-4000000	0
100000	0.006	93400	170000	509964	18018	527982	406140	141221	4000000	280000	4.8392e+06	2.08301e+06	-2756196	0
200000	0.012	185600	340000	1013376	39312	1052688	809760	280627	4000000	280000	5.67332e+06	4.13925e+06	-1534064	0
300000	0.018	276600	510000	1510236	63882	1574118	1210860	418219	4000000	280000	6.50234e+06	6.16873e+06	-333604	0
400000	0.024	366400	680000	2.00054e+06	91728	2092272	1609440	553997	4000000	280000	7.32627e+06	8.17145e+06	845184	845184
500000	0.03	455000	850000	2.4843e+06	122850	2.60715e+06	2.0055e+06	687960	4000000	280000	8145110	10147410	2002300	2002300
600000	0.036	542400	1020000	2961504	157248	3118752	2399040	820109	4000000	280000	8.95886e+06	1.20966e+07	3137744	3137744
700000	0.042	628600	1190000	3.43216e+06	194922	3627078	2790060	950443	4000000	280000	9.76752e+06	1.4019e+07	4.25152e+06	4.25152e+06
800000	0.048	713600	1360000	3.89626e+06	235872	4132128	3178560	1.07896e+06	4000000	280000	1.05711e+07	1.59147e+07	5.34362e+06	5.34362e+06
900000	0.054	797400	1530000	4353804	280098	4633902	3564540	1.20567e+06	4000000	280000	1.13696e+07	1.77836e+07	6.41404e+06	6.41404e+06
1000000	0.06	880000	1700000	4804800	327600	5132400	3948000	1330560	4000000	280000	12162960	19625760	7462800	7462800
1100000	0.066	961400	1870000	5.24924e+06	378378	5.62762e+06	4.32894e+06	1.45364e+06	4000000	280000	1.29513e+07	2.14411e+07	8.48988e+06	8.48988e+06
1200000	0.072	1.0416e+06	2040000	5.68714e+06	432432	6.11957e+06	4.70736e+06	1.5749e+06	4000000	280000	1.37345e+07	2.32298e+07	9.4953e+06	9.4953e+06
1300000	0.078	1.1206e+06	2210000	6.11848e+06	489762	6608238	5083260	1.69435e+06	4000000	280000	1.45126e+07	2.49916e+07	1.0479e+07	1.0479e+07
1400000	0.084	1.1984e+06	2380000	6.54326e+06	550368	7093632	5456640	1.81198e+06	4000000	280000	1.52856e+07	2.67267e+07	1.14411e+07	1.14411e+07
1500000	0.09	1275000	2550000	6961500	614250	7575750	5827500	1927800	4000000	280000	16053550	28435050	12381500	12381500
1600000	0.096	1350400	2720000	7373184	681408	8054592	6195840	2.0418e+06	4000000	280000	1.68164e+07	3.01166e+07	13300224	13300224
1700000	0.102	1424600	2890000	7778316	751842	8530158	6561660	2.154e+06	4000000	280000	1.75742e+07	3.17714e+07	1.41973e+07	1.41973e+07
1800000	0.108	1497600	3060000	8176896	825552	9002448	6924960	2.26437e+06	4000000	280000	1.83268e+07	3.33995e+07	1.50727e+07	1.50727e+07
1900000	0.114	1569400	3230000	8568924	902538	9471462	7285740	2.37293e+06	4000000	280000	1.90744e+07	3.50008e+07	1.59264e+07	1.59264e+07
2000000	0.12	1640000	3400000	8954400	982800	9937200	7644000	2479680	4000000	280000	19816880	36575280	16758400	16758400
2100000	0.126	1709400	3570000	9333324	1066338	10399662	7999740	2.58461e+06	4000000	280000	2.05543e+07	3.8123e+07	1.75688e+07	1.75688e+07
2200000	0.132	1.7776e+06	3740000	9705696	1.15315e+06	10858848	8352960	2.68773e+06	4000000	280000	2.12866e+07	3.9644e+07	1.83575e+07	1.83575e+07
2300000	0.138	1.8446e+06	3910000	1.00715e+07	1.24324e+06	1.13148e+07	8.70366e+06	2.78904e+06	4000000	280000	2.20138e+07	4.11383e+07	19124476	19124476
2400000	0.144	1.9104e+06	4080000	1.04308e+07	1.33661e+06	1.17674e+07	9.05184e+06	2.88852e+06	4000000	280000	2.27359e+07	4.26057e+07	1.98698e+07	1.98698e+07
2500000	0.15	1.975e+06	4250000	1.07835e+07	1.43325e+06	1.22167e+07	9.3975e+06	2.9862e+06	4000000	280000	23452950	4.40464e+07	2.05935e+07	2.05935e+07
2600000	0.156	2.0384e+06	4420000	1.11297e+07	1.53317e+06	1.26628e+07	9.74064e+06	3.08206e+06	4000000	280000	2.41649e+07	4.54604e+07	2.12955e+07	2.12955e+07
2700000	0.162	2100600	4590000	11469276	1636362	13105638	10081260	3.17611e+06	4000000	280000	2.48717e+07	4.68476e+07	2.19758e+07	2.19758e+07
2800000	0.168	2.1616e+06	4760000	1.18023e+07	1.74283e+06	13545168	10419360	3.26834e+06	4000000	280000	2.55735e+07	4.8208e+07	2.26345e+07	2.26345e+07
2900000	0.174	2.2214e+06	4930000	1.21288e+07	1.85258e+06	13981422	10754940	3.35876e+06	4000000	280000	2.62702e+07	4.95417e+07	2.32715e+07	2.32715e+07
3000000	0.18	2.28e+06	5100000	1.24488e+07	1.9656e+06	14414400	11088000	3.44736e+06	4000000	280000	26961760	5.08486e+07	2.38868e+07	2.38868e+07
3100000	0.186	2.3374e+06	5270000	1.27622e+07	2.0819e+06	14844102	11418540	3.53415e+06	4000000	280000	2.76483e+07	5.21287e+07	2.44804e+07	2.44804e+07
3200000	0.192	2.3936e+06	5440000	1.30691e+07	2.20147e+06	15270528	11746560	3.61912e+06	4000000	280000	2.83297e+07	5.33821e+07	2.50524e+07	2.50524e+07
3300000	0.198	2.4486e+06	5610000	1.33694e+07	2.32432e+06	15693678	12072060	3.70228e+06	4000000	280000	2.9006e+07	5.46087e+07	2.56027e+07	2.56027e+07
3400000	0.204	2502400	5780000	13663104	2450448	16113552	12395040	3.78363e+06	4000000	280000	2.96772e+07	5.58085e+07	2.61313e+07	2.61313e+07
3500000	0.21	2555000	5950000	13950300	2579850	16530150	12715500	3863160	4000000	280000	30343310	56981610	26638300	26638300
3600000	0.216	2.6064e+06	6120000	1.42309e+07	2.71253e+06	16943472	13033440	3.94088e+06	4000000	280000	3.10043e+07	5.81279e+07	2.71236e+07	2.71236e+07
3700000	0.222	2656600	6290000	14505036	2848482	17353518	13348860	4.01678e+06	4000000	280000	3.16603e+07	5.92475e+07	2.75872e+07	2.75872e+07
3800000	0.228	2705600	6460000	14772576	2987712	17760288	13661760	4.09087e+06	4000000	280000	3.23112e+07	6.03403e+07	2.80291e+07	2.80291e+07
3900000	0.234	2753400	6630000	15033564	3130218	18163782	13972140	4.16314e+06	4000000	280000	3.29569e+07	6.14063e+07	2.84494e+07	2.84494e+07
4000000	0.24	2800000	6800000	15288000	3276000	18564000	14280000	4233600	4000000	280000	33597600	6.24456e+07	2.8848e+07	2.8848e+07
4100000	0.246	2845400	6970000	15535884	3425058	18960942	14585340	4.30224e+06	4000000	280000	3.42332e+07	6.34581e+07	2.92249e+07	2.92249e+07
4200000	0.252	2889600	7140000	15777216	3577392	19354608	14888160	4.36908e+06	4000000	280000	3.48637e+07	6.44439e+07	29580176	29580176
4300000	0.258	2.9326e+06	7310000	1.6012e+07	3.733e+06	19744998	15188460	4.43409e+06	4000000	280000	3.54891e+07	6.54028e+07	2.99138e+07	2.99138e+07
4400000	0.264	2.9744e+06	7480000	1.62402e+07	3.89189e+06	20132112	15486240	4.49729e+06	4000000	280000	3.61094e+07	6.63351e+07	3.02257e+07	3.02257e+07
4500000	0.27	3.015e+06	7650000	1.64619e+07	4.05405e+06	20515950	15781500	4558680	4000000	280000	36724630	67240530	30515900	30515900
4600000	0.276	3.0544e+06	7820000	1.6677e+07	4.21949e+06	20896512	16074240	4.61825e+06	4000000	280000	3.73348e+07	6.81192e+07	30784464	30784464
4700000	0.282	3.0926e+06	7990000	16885596	4.3882e+06	21273798	16364460	4.67601e+06	4000000	280000	3.79398e+07	6.89712e+07	3.10314e+07	3.10314e+07
4800000	0.288	3.1296e+06	8160000	17087616	4.56019e+06	21647808	16652160	4.73196e+06	4000000	280000	3.85398e+07	6.97963e+07	3.12566e+07	3.12566e+07
4900000	0.294	3.1654e+06	8330000	17283084	4.73546e+06	22018542	16937340	4.78608e+06	4000000	280000	3.91346e+07	7.05948e+07	31460124	31460124
5000000	0.3	3.2e+06	8500000	17472000	4.914e+06	22386000	17220000	4838400	4000000	280000	39724400	71366400	31642000	31642000
0	0	0	0	0	0	0	0	0	5000000	350000	5000000	0	-5000000	0
100000	0.0048	93520	170000	510619	17690.4	528310	406392	141402	5000000	350000	5.83971e+06	2.08568e+06	-3.75403e+06	0
200000	0.0096	186080	340000	1.016e+06	38001.6	1.054e+06	810768	281353	5000000	350000	6.67535e+06	4.14996e+06	-2.5254e+06	0
300000	0.0144	277680	510000	1.51613e+06	60933.6	1.57707e+06	1213128	419852	5000000	350000	7.50692e+06	6.19282e+06	-1.3141e+06	0
400000	0.0192	368320	680000	2.01103e+06	86486.4	2.09751e+06	1613472	556900	5000000	350000	8.33441e+06	8.21427e+06	-120141	0
500000	0.024	458000	850000	2.50068e+06	114660	2.61534e+06	2.0118e+06	692496	5000000	350000	9157836	10214316	1056480	1056480
600000	0.0288	546720	1020000	2.98509e+06	145454	3.13055e+06	2408112	826641	5000000	350000	9.97719e+06	1.21929e+07	2.21576e+06	2.21576e+06
700000	0.0336	634480	1190000	3.46426e+06	178870	3.64313e+06	2802408	959334	5000000	350000	1.07925e+07	1.41502e+07	3.35771e+06	3.35771e+06
800000	0.0384	721280	1360000	3.93819e+06	214906	4.15309e+06	3194688	1.09058e+06	5000000	350000	1.16037e+07	1.6086e+07	4.48232e+06	4.48232e+06
900000	0.0432	807120	1530000	4.40688e+06	253562	4.66044e+06	3.58495e+06	1.22037e+06	5000000	350000	1.24108e+07	1.80004e+07	5.58959e+06	5.58959e+06
1000000	0.048	892000	1700000	4870320	294840	5165160	3973200	1348704	5000000	350000	13213864	19893384	6679520	6679520
1100000	0.0528	975920	1870000	5.32852e+06	338738	5.66726e+06	4359432	1.47559e+06	5000000	350000	1.40129e+07	2.1765e+07	7.75212e+06	7.75212e+06
1200000	0.0576	1058880	2040000	5.78148e+06	385258	6.16674e+06	4.74365e+06	1.60103e+06	5000000	350000	1.48078e+07	2.36151e+07	8.80737e+06	8.80737e+06
1300000	0.0624	1140880	2210000	6.2292e+06	434398	6.6636e+06	5.12585e+06	1.72501e+06	5000000	350000	1.55986e+07	2.54439e+07	9.84529e+06	9.84529e+06
1400000	0.0672	1.22192e+06	2380000	6.67168e+06	486158	7.15784e+06	5.50603e+06	1.84754e+06	5000000	350000	1.63854e+07	2.72513e+07	1.08659e+07	1.08659e+07
1500000	0.072	1302000	2550000	7108920	540540	7649460	5884200	1968624	5000000	350000	17168084	29037204	11869120	11869120
1600000	0.0768	1381120	2720000	7.54092e+06	597542	8.13846e+06	6260352	2.08825e+06	5000000	350000	1.79467e+07	3.08017e+07	1.2855e+07	1.2855e+07
1700000	0.0816	1459280	2890000	7.96767e+06	657166	8.62483e+06	6634488	2.20643e+06	5000000	350000	1.87213e+07	3.25449e+07	1.38236e+07	1.38236e+07
1800000	0.0864	1.53648e+06	3060000	8.38918e+06	719410	9.10859e+06	7006608	2.32316e+06	5000000	350000	1.94917e+07	3.42666e+07	1.47748e+07	1.47748e+07
1900000	0.0912	1612720	3230000	8.80545e+06	784274	9.58973e+06	7.37671e+06	2.43843e+06	5000000	350000	2.02582e+07	3.59669e+07	1.57087e+07	1.57087e+07
2000000	0.096	1688000	3400000	9216480	851760	10068240	7744800	2552256	5000000	350000	21020496	37645776	16625280	16625280
2100000	0.1008	1762320	3570000	9.62227e+06	921866	1.05441e+07	8.11087e+06	2.66463e+06	5000000	350000	2.17788e+07	3.93033e+07	1.75245e+07	1.75245e+07
2200000	0.1056	1.83568e+06	3740000	1.00228e+07	994594	1.10174e+07	8.47493e+06	2.77555e+06	5000000	350000	2.2533e+07	4.09393e+07	1.84064e+07	1.84064e+07
2300000	0.1104	1.90808e+06	3910000	1.04181e+07	1.06994e+06	1.14881e+07	8.83697e+06	2.88502e+06	5000000	350000	2.32831e+07	4.2554e+07	1.92709e+07	1.92709e+07
2400000	0.1152	1979520	4080000	1.08082e+07	1.14791e+06	1.19561e+07	9196992	2.99303e+06	5000000	350000	2.40291e+07	4.41473e+07	2.01181e+07	2.01181e+07
2500000	0.12	2.05e+06	4250000	1.1193e+07	1.2285e+06	1.24215e+07	9.555e+06	3.0996e+06	5000000	350000	24771100	4.57191e+07	2.0948e+07	2.0948e+07
2600000	0.1248	2119520	4420000	1.15726e+07	1.31171e+06	1.28843e+07	9910992	3.20471e+06	5000000	350000	2.5509e+07	4.72695e+07	2.17605e+07	2.17605e+07
2700000	0.1296	2188080	4590000	1.19469e+07	1.39754e+06	1.33445e+07	10264968	3.30838e+06	5000000	350000	2.62428e+07	4.87986e+07	2.25557e+07	2.25557e+07
2800000	0.1344	2255680	4760000	1.2316e+07	1.48599e+06	1.3802e+07	10616928	3.41059e+06	5000000	350000	2.69726e+07	5.03062e+07	2.33336e+07	2.33336e+07
2900000	0.1392	2322320	4930000	1.26799e+07	1.57707e+06	1.42569e+07	10966872	3.51135e+06	5000000	350000	2.76983e+07	5.17924e+07	2.40941e+07	2.40941e+07
3000000	0.144	2388000	5100000	13038480	1670760	14709240	11314800	3610656	5000000	350000	28419896	53257176	24837280	24837280
3100000	0.1488	2.45272e+06	5270000	1.33919e+07	1.76707e+06	1.51589e+07	11660712	3.70851e+06	5000000	350000	2.91374e+07	5.47006e+07	2.55631e+07	2.55631e+07
3200000	0.1536	2516480	5440000	1.374e+07	1.86601e+06	1.5606e+07	12004608	3.80492e+06	5000000	350000	2.98509e+07	5.61225e+07	2.62716e+07	2.62716e+07
3300000	0.1584	2579280	5610000	1.40829e+07	1.96757e+06	1.60504e+07	12346488	3.89987e+06	5000000	350000	3.05603e+07	5.75231e+07	2.69628e+07	2.69628e+07
3400000	0.1632	2641120	5780000	1.44205e+07	2.07174e+06	1.64923e+07	12686352	3.99337e+06	5000000	350000	3.12656e+07	5.89023e+07	2.76366e+07	2.76366e+07
3500000	0.168	2702000	5950000	14752920	2178540	16931460	13024200	4085424	5000000	350000	31966884	60260004	28293120	28293120
3600000	0.1728	2.76192e+06	6120000	1.50801e+07	2.28796e+06	1.7368e+07	1.336e+07	4.17602e+06	5000000	350000	3.26641e+07	6.15963e+07	2.89323e+07	2.89323e+07
3700000	0.1776	2820880	6290000	1.5402e+07	2.4e+06	1.7802e+07	1.36938e+07	4.26517e+06	5000000	350000	3.33572e+07	6.29113e+07	2.95541e+07	2.95541e+07
3800000	0.1824	2878880	6460000	1.57187e+07	2.51466e+06	1.82333e+07	1.40256e+07	4.35287e+06	5000000	350000	3.40462e+07	6.42048e+07	3.01586e+07	3.01586e+07
3900000	0.1872	2.93592e+06	6630000	1.60301e+07	2.63194e+06	1.86621e+07	1.43554e+07	4.43911e+06	5000000	350000	3.47312e+07	6.54769e+07	3.07457e+07	3.07457e+07
4000000	0.192	2992000	6800000	16336320	2751840	19088160	14683200	4523904	5000000	350000	35412064	6.67276e+07	3.13155e+07	3.13155e+07
4100000	0.1968	3047120	6970000	1.66373e+07	2.87436e+06	1.95116e+07	15008952	4.60725e+06	5000000	350000	3.60889e+07	6.79569e+07	3.1868e+07	3.1868e+07
4200000	0.2016	3101280	7140000	1.6933e+07	2.99951e+06	1.99325e+07	1.53327e+07	4.68914e+06	5000000	350000	3.67616e+07	6.91647e+07	3.24031e+07	3.24031e+07
4300000	0.2064	3154480	7310000	1.72235e+07	3.12727e+06	2.03507e+07	1.56544e+07	4.76957e+06	5000000	350000	3.74303e+07	7.03512e+07	3.29209e+07	3.29209e+07
4400000	0.2112	3.20672e+06	7480000	1.75087e+07	3.25765e+06	2.07663e+07	15974112	4.84856e+06	5000000	350000	3.80949e+07	7.15163e+07	3.34214e+07	3.34214e+07
4500000	0.216	3258000	7650000	17788680	3390660	21179340	16291800	4926096	5000000	350000	38755436	72659916	33904480	33904480
4600000	0.2208	3308320	7820000	1.80634e+07	3.52629e+06	2.15897e+07	1.66075e+07	5.00218e+06	5000000	350000	3.94119e+07	7.37822e+07	3.43703e+07	3.43703e+07
4700000	0.2256	3.35768e+06	7990000	1.83329e+07	3.66453e+06	2.19975e+07	16921128	5.07681e+06	5000000	350000	4.00643e+07	7.4883e+07	3.48187e+07	3.48187e+07
4800000	0.2304	3406080	8160000	1.85972e+07	3.8054e+06	2.24026e+07	17232768	5.14999e+06	5000000	350000	4.07126e+07	7.59624e+07	3.52498e+07	3.52498e+07
4900000	0.2352	3453520	8330000	1.88562e+07	3.94889e+06	2.28051e+07	1.75424e+07	5.22172e+06	5000000	350000	4.13568e+07	7.70204e+07	3.56636e+07	3.56636e+07
5000000	0.24	3500000	8500000	19110000	4095000	23205000	17850000	5292000	5000000	350000	41997000	78057000	36060000	36060000
0	0	0	0	0	0	0	0	0	6000000	420000	6000000	0	-6000000	0
100000	0.004	93600	170000	511056	17472	528528	406560	141523	6000000	420000	6.84005e+06	2.08747e+06	-4752584	0
200000	0.008	186400	340000	1017744	37128	1054872	811440	281837	6000000	420000	7.67671e+06	4.15709e+06	-3.51962e+06	0
300000	0.012	278400	510000	1520064	58968	1579032	1214640	420941	6000000	420000	8.50997e+06	6.20888e+06	-2301096	0
400000	0.016	369600	680000	2018016	82992	2101008	1616160	558835	6000000	420000	9.33984e+06	8.24282e+06	-1.09702e+06	0
500000	0.02	460000	850000	2.5116e+06	109200	2.6208e+06	2.016e+06	695520	6000000	420000	10166320	10258920	92600	92600
600000	0.024	549600	1020000	3000816	137592	3138408	2414160	830995	6000000	420000	1.09894e+07	1.22572e+07	1.26778e+06	1.26778e+06
700000	0.028	638400	1190000	3485664	168168	3653832	2810640	965261	6000000	420000	1.18091e+07	1.42376e+07	2428504	2428504
800000	0.032	726400	1360000	3.96614e+06	200928	4167072	3205440	1.09832e+06	6000000	420000	1.26254e+07	1.62002e+07	3.57478e+06	3.57478e+06
900000	0.036	813600	1530000	4442256	235872	4678128	3598560	1.23016e+06	6000000	420000	1.34383e+07	1.81449e+07	4706616	4706616
1000000	0.04	900000	1700000	4.914e+06	273000	5.187e+06	3.99e+06	1360800	6000000	420000	14247800	20071800	5824000	5824000
1100000	0.044	985600	1870000	5.38138e+06	312312	5.69369e+06	4.37976e+06	1.49023e+06	6000000	420000	1.50539e+07	2.19809e+07	6.92694e+06	6.92694e+06
1200000	0.048	1070400	2040000	5844384	353808	6198192	4767840	1.61844e+06	6000000	420000	1.58566e+07	2.38721e+07	8015424	8015424
1300000	0.052	1.1544e+06	2210000	6.30302e+06	397488	6700512	5154240	1.74545e+06	6000000	420000	1.6656e+07	2.57454e+07	9.08946e+06	9.08946e+06
1400000	0.056	1.2376e+06	2380000	6.7573e+06	443352	7200648	5538960	1.87125e+06	6000000	420000	1.74519e+07	2.7601e+07	1.01491e+07	1.01491e+07
1500000	0.06	1.32e+06	2550000	7.2072e+06	491400	7698600	5922000	1.99584e+06	6000000	420000	18244440	2.94386e+07	1.11942e+07	1.11942e+07
1600000	0.064	1.4016e+06	2720000	7.65274e+06	541632	8194368	6303360	2.11922e+06	6000000	420000	1.90336e+07	3.12585e+07	1.22249e+07	1.22249e+07
1700000	0.068	1.4824e+06	2890000	8.0939e+06	594048	8687952	6683040	2.24139e+06	6000000	420000	1.98193e+07	3.30605e+07	1.32411e+07	1.32411e+07
1800000	0.072	1562400	3060000	8530704	648648	9179352	7061040	2.36235e+06	6000000	420000	2.06017e+07	3.48446e+07	1.42429e+07	1.42429e+07
1900000	0.076	1641600	3230000	8963136	705432	9668568	7437360	2.4821e+06	6000000	420000	2.13807e+07	3.6611e+07	1.52303e+07	1.52303e+07
2000000	0.08	1720000	3400000	9391200	764400	10155600	7812000	2600640	6000000	420000	22156240	38359440	16203200	16203200
2100000	0.084	1797600	3570000	9814896	825552	10640448	8184960	2.71797e+06	6000000	420000	2.29284e+07	4.00901e+07	1.71617e+07	1.71617e+07
2200000	0.088	1874400	3740000	10234224	888888	11123112	8556240	2.83409e+06	6000000	420000	2.36972e+07	4.18029e+07	1.81057e+07	1.81057e+07
2300000	0.092	1950400	3910000	10649184	954408	11603592	8925840	2.949e+06	6000000	420000	2.44626e+07	4.34978e+07	1.90352e+07	1.90352e+07
2400000	0.096	2025600	4080000	11059776	1022112	12081888	9293760	3.06271e+06	6000000	420000	2.52246e+07	4.51749e+07	1.99503e+07	1.99503e+07
2500000	0.1	2100000	4250000	11466000	1092000	12558000	9660000	3175200	6000000	420000	25983200	46834200	20851000	20851000
2600000	0.104	2173600	4420000	11867856	1164072	13031928	10024560	3.28648e+06	6000000	420000	2.67384e+07	4.84756e+07	2.17372e+07	2.17372e+07
2700000	0.108	2246400	4590000	12265344	1238328	13503672	10387440	3.39656e+06	6000000	420000	2.74902e+07	5.00992e+07	2.2609e+07	2.2609e+07
2800000	0.112	2318400	4760000	12658464	1314768	13973232	10748640	3.50542e+06	6000000	420000	2.82387e+07	5.1705e+07	2.34663e+07	2.34663e+07
2900000	0.116	2389600	4930000	13047216	1393392	14440608	11108160	3.61308e+06	6000000	420000	2.89837e+07	5.32929e+07	2.43092e+07	2.43092e+07
3000000	0.12	2460000	5100000	13431600	1474200	14905800	11466000	3719520	6000000	420000	29725320	54862920	25137600	25137600
3100000	0.124	2529600	5270000	13811616	1557192	15368808	11822160	3.82476e+06	6000000	420000	3.04636e+07	5.64151e+07	2.59516e+07	2.59516e+07
3200000	0.128	2598400	5440000	14187264	1642368	15829632	12176640	3.92878e+06	6000000	420000	3.11984e+07	5.79495e+07	2.67511e+07	2.67511e+07
3300000	0.132	2666400	5610000	14558544	1729728	16288272	12529440	4.0316e+06	6000000	420000	3.19299e+07	5.94661e+07	2.75362e+07	2.75362e+07
3400000	0.136	2733600	5780000	14925456	1819272	16744728	12880560	4.1332e+06	6000000	420000	3.26579e+07	6.09647e+07	2.83068e+07	2.83068e+07
3500000	0.14	2.8e+06	5950000	1.5288e+07	1.911e+06	17199000	13230000	4233600	6000000	420000	33382600	6.24456e+07	2.9063e+07	2.9063e+07
3600000	0.144	2.8656e+06	6120000	1.56462e+07	2.00491e+06	17651088	13577760	4.33279e+06	6000000	420000	3.41039e+07	6.39086e+07	2.98047e+07	2.98047e+07
3700000	0.148	2.9304e+06	6290000	1.6e+07	2.10101e+06	18100992	13923840	4.43076e+06	6000000	420000	3.48218e+07	6.53538e+07	3.0532e+07	3.0532e+07
3800000	0.152	2.9944e+06	6460000	1.63494e+07	2.19929e+06	18548712	14268240	4.52753e+06	6000000	420000	3.55362e+07	6.67811e+07	3.12449e+07	3.12449e+07
3900000	0.156	3.0576e+06	6630000	1.66945e+07	2.29975e+06	18994248	14610960	4.62309e+06	6000000	420000	3.62473e+07	6.81906e+07	3.19433e+07	3.19433e+07
4000000	0.16	3.12e+06	6800000	17035200	2.4024e+06	19437600	14952000	4717440	6000000	420000	36955040	69582240	32627200	32627200
4100000	0.164	3.1816e+06	6970000	17371536	2.50723e+06	19878768	15291360	4.81058e+06	6000000	420000	3.76593e+07	7.0956e+07	3.32967e+07	3.32967e+07
4200000	0.168	3242400	7140000	17703504	2614248	20317752	15629040	4.90251e+06	6000000	420000	3.83603e+07	7.2312e+07	33951744	33951744
4300000	0.172	3.3024e+06	7310000	18031104	2.72345e+06	20754552	15965040	4.99323e+06	6000000	420000	3.90578e+07	7.36501e+07	34592344	34592344
4400000	0.176	3361600	7480000	18354336	2834832	21189168	16299360	5.08274e+06	6000000	420000	3.97519e+07	7.49704e+07	35218496	35218496
4500000	0.18	3.42e+06	7650000	18673200	2.9484e+06	21621600	16632000	5171040	6000000	420000	40442640	76272840	35830200	35830200
4600000	0.184	3477600	7820000	18987696	3064152	22051848	16962960	5.25813e+06	6000000	420000	4.113e+07	7.75574e+07	36427456	36427456
4700000	0.188	3.5344e+06	7990000	19297824	3.18209e+06	22479912	17292240	5.34401e+06	6000000	420000	4.18139e+07	7.88242e+07	37010264	37010264
4800000	0.192	3590400	8160000	19603584	3302208	22905792	17619840	5.42868e+06	6000000	420000	4.24945e+07	8.00731e+07	3.75786e+07	3.75786e+07
4900000	0.196	3645600	8330000	19904976	3424512	23329488	17945760	5.51215e+06	6000000	420000	4.31716e+07	8.13042e+07	38132536	38132536
5000000	0.2	3700000	8500000	20202000	3549000	23751000	18270000	5594400	6000000	420000	43845400	82517400	38672000	38672000
0	0	0	0	0	0	0	0	0	7000000	490000	7000000	0	-7000000	0
100000	0.00342857	93657.1	170000	511368	17316	528684	406680	141610	7000000	490000	7.84029e+06	2.08874e+06	-5751552	0
200000	0.00685714	186629	340000	1018992	36504	1055496	811920	282182	7000000	490000	8.67768e+06	4.16219e+06	-4.51549e+06	0
300000	0.0102857	278914	510000	1522872	57564	1580436	1215720	421718	7000000	490000	9.51215e+06	6.22035e+06	-3.29181e+06	0
400000	0.0137143	370514	680000	2023008	80496	2103504	1618080	560218	7000000	490000	1.03437e+07	8.26321e+06	-2.08051e+06	0
500000	0.0171429	461429	850000	2519400	105300	2624700	2019000	697680	7000000	490000	11172380	10290780	-881600	0
600000	0.0205714	551657	1020000	3012048	131976	3144024	2418480	834106	7000000	490000	1.19981e+07	1.23031e+07	304928	304928
700000	0.024	641200	1190000	3500952	160524	3661476	2816520	969494	7000000	490000	1.2821e+07	1.43e+07	1479072	1479072
800000	0.0274286	730057	1360000	3986112	190944	4177056	3213120	1.10385e+06	7000000	490000	1.36409e+07	1.62817e+07	2640832	2640832
900000	0.0308571	818229	1530000	4467528	223236	4690764	3608280	1.23716e+06	7000000	490000	1.44579e+07	1.82481e+07	3.79021e+06	3.79021e+06
1000000	0.0342857	905714	1700000	4945200	257400	5202600	4002000	1369440	7000000	490000	15272040	20199240	4927200	4927200
1100000	0.0377143	992514	1870000	5419128	293436	5712564	4394280	1.50068e+06	7000000	490000	1.60832e+07	2.21351e+07	6.05181e+06	6.05181e+06
1200000	0.0411429	1.07863e+06	2040000	5889312	331344	6220656	4785120	1.63089e+06	7000000	490000	1.68915e+07	2.40556e+07	7164032	7164032
1300000	0.0445714	1.16406e+06	2210000	6.35575e+06	371124	6.72688e+06	5.17452e+06	1.76005e+06	7000000	490000	1.76969e+07	2.59608e+07	8.26387e+06	8.26387e+06
1400000	0.048	1.2488e+06	2380000	6.81845e+06	412776	7231224	5562480	1.88819e+06	7000000	490000	1.84994e+07	2.78507e+07	9.35133e+06	9.35133e+06
1500000	0.0514286	1.33286e+06	2550000	7277400	456300	7733700	5949000	2.01528e+06	7000000	490000	19298980	2.97254e+07	1.04264e+07	1.04264e+07
1600000	0.0548571	1.41623e+06	2720000	7732608	501696	8234304	6334080	2.14134e+06	7000000	490000	2.00956e+07	3.15847e+07	1.14891e+07	1.14891e+07
1700000	0.0582857	1.49891e+06	2890000	8184072	548964	8733036	6717720	2.26636e+06	7000000	490000	2.08894e+07	3.34288e+07	1.25394e+07	1.25394e+07
1800000	0.0617143	1.58091e+06	3060000	8631792	598104	9229896	7099920	2.39034e+06	7000000	490000	2.16802e+07	3.52576e+07	13577312	13577312
1900000	0.0651429	1.66223e+06	3230000	9075768	649116	9724884	7480680	2.51329e+06	7000000	490000	2.24682e+07	3.7071e+07	1.46028e+07	1.46028e+07
2000000	0.0685714	1.74286e+06	3400000	9516000	702000	10218000	7860000	2.6352e+06	7000000	490000	23253200	38869200	15616000	15616000
2100000	0.072	1.8228e+06	3570000	9.95249e+06	756756	1.07092e+07	8.23788e+06	2.75607e+06	7000000	490000	2.40353e+07	4.06521e+07	1.66168e+07	1.66168e+07
2200000	0.0754286	1.90206e+06	3740000	10385232	813384	11198616	8614320	2.87591e+06	7000000	490000	2.48145e+07	4.24197e+07	17605152	17605152
2300000	0.0788571	1.98063e+06	3910000	10814232	871884	11686116	8989320	2.99471e+06	7000000	490000	2.55908e+07	4.4172e+07	18581152	18581152
2400000	0.0822857	2.05851e+06	4080000	1.12395e+07	932256	1.21717e+07	9.36288e+06	3.11247e+06	7000000	490000	2.63642e+07	4.5909e+07	1.95448e+07	1.95448e+07
2500000	0.0857143	2.13571e+06	4250000	1.1661e+07	994500	1.26555e+07	9.735e+06	3.2292e+06	7000000	490000	27134700	4.76307e+07	2.0496e+07	2.0496e+07
2600000	0.0891429	2.21223e+06	4420000	12078768	1.05862e+06	13137384	10105680	3.34489e+06	7000000	490000	2.79023e+07	4.93371e+07	2.14348e+07	2.14348e+07
2700000	0.0925714	2.28806e+06	4590000	12492792	1.1246e+06	13617396	10474920	3.45954e+06	7000000	490000	2.86669e+07	5.10283e+07	2.23613e+07	2.23613e+07
2800000	0.096	2363200	4760000	12903072	1192464	14095536	10842720	3.57316e+06	7000000	490000	2.94287e+07	5.27041e+07	2.32754e+07	2.32754e+07
2900000	0.0994286	2.43766e+06	4930000	13309608	1.2622e+06	14571804	11209080	3.68574e+06	7000000	490000	3.01875e+07	5.43646e+07	2.41771e+07	2.41771e+07
3000000	0.102857	2.51143e+06	5100000	13712400	1.3338e+06	15046200	11574000	3.79728e+06	7000000	490000	30943480	56009880	25066400	25066400
3100000	0.106286	2.58451e+06	5270000	14111448	1.40728e+06	15518724	11937480	3.90779e+06	7000000	490000	3.16965e+07	5.76398e+07	2.59433e+07	2.59433e+07
3200000	0.109714	2.65691e+06	5440000	14506752	1.48262e+06	15989376	12299520	4.01725e+06	7000000	490000	3.24466e+07	5.92545e+07	2.68079e+07	2.68079e+07
3300000	0.113143	2.72863e+06	5610000	14898312	1559844	16458156	12660120	4.12569e+06	7000000	490000	3.31938e+07	6.08539e+07	2.766e+07	2.766e+07
3400000	0.116571	2.79966e+06	5780000	15286128	1.63894e+06	16925064	13019280	4.23308e+06	7000000	490000	3.39381e+07	6.2438e+07	2.84998e+07	2.84998e+07
3500000	0.12	2870000	5950000	15670200	1719900	17390100	13377000	4339440	7000000	490000	34679540	6.40067e+07	2.93272e+07	2.93272e+07
3600000	0.123429	2.93966e+06	6120000	16050528	1.80274e+06	17853264	13733280	4.44476e+06	7000000	490000	3.5418e+07	6.55602e+07	3.01422e+07	3.01422e+07
3700000	0.126857	3.00863e+06	6290000	1.64271e+07	1.88744e+06	18314556	14088120	4.54905e+06	7000000	490000	3.61536e+07	6.70984e+07	3.09448e+07	3.09448e+07
3800000	0.130286	3.07691e+06	6460000	16799952	1.97402e+06	18773976	14441520	4.65229e+06	7000000	490000	3.68863e+07	6.86213e+07	3.17351e+07	3.17351e+07
3900000	0.133714	3.14451e+06	6630000	17169048	2.06248e+06	19231524	14793480	4.75451e+06	7000000	490000	3.7616e+07	7.0129e+07	3.25129e+07	3.25129e+07
4000000	0.137143	3.21143e+06	6800000	17534400	2152800	19687200	15144000	4855680	7000000	490000	38342880	71621280	33278400	33278400
4100000	0.140571	3.27766e+06	6970000	17896008	2.245e+06	20141004	15493080	4.95582e+06	7000000	490000	3.90668e+07	7.30983e+07	3.40315e+07	3.40315e+07
4200000	0.144	3.3432e+06	7140000	18253872	2.33906e+06	20592936	15840720	5.05492e+06	7000000	490000	3.97879e+07	7.456e+07	3.47722e+07	3.47722e+07
4300000	0.147429	3.40806e+06	7310000	18607992	2.435e+06	21042996	16186920	5.15298e+06	7000000	490000	4.0506e+07	7.60065e+07	3.55005e+07	3.55005e+07
4400000	0.150857	3.47223e+06	7480000	18958368	2532816	21491184	16531680	5.25001e+06	7000000	490000	4.12212e+07	7.74376e+07	3.62164e+07	3.62164e+07
4500000	0.154286	3.53571e+06	7650000	19305000	2.6325e+06	2.19375e+07	1.6875e+07	5.346e+06	7000000	490000	41933500	7.88535e+07	3.692e+07	3.692e+07
4600000	0.157714	3.59851e+06	7820000	19647888	2.73406e+06	22381944	17216880	5.44095e+06	7000000	490000	4.26429e+07	8.02541e+07	3.76112e+07	3.76112e+07
4700000	0.161143	3.66063e+06	7990000	19987032	2837484	22824516	17557320	5.53487e+06	7000000	490000	4.33494e+07	8.16393e+07	3.829e+07	3.829e+07
4800000	0.164571	3.72206e+06	8160000	20322432	2942784	23265216	17896320	5.62775e+06	7000000	490000	4.4053e+07	8.30093e+07	3.89564e+07	3.89564e+07
4900000	0.168	3782800	8330000	20654088	3049956	23704044	18233880	5.71959e+06	7000000	490000	4.47536e+07	8.4364e+07	3.96104e+07	3.96104e+07
5000000	0.171429	3.84286e+06	8500000	2.0982e+07	3.159e+06	2.4141e+07	1.857e+07	5810400	7000000	490000	45451400	85703400	40252000	40252000
0	0	0	0	0	0	0	0	0	8000000	560000	8000000	0	-8000000	0
100000	0.003	93700	170000	511602	17199	528801	406770	141674	8000000	560000	8.84048e+06	2.0897e+06	-6750778	0
200000	0.006	186800	340000	1019928	36036	1055964	812280	282442	8000000	560000	9.67841e+06	4.16601e+06	-5512392	0
300000	0.009	279300	510000	1524978	56511	1581489	1216530	422302	8000000	560000	1.05138e+07	6.22895e+06	-4.28484e+06	0
400000	0.012	371200	680000	2026752	78624	2105376	1619520	561254	8000000	560000	1.13466e+07	8.2785e+06	-3068128	0
500000	0.015	462500	850000	2.52525e+06	102375	2.62762e+06	2.02125e+06	699300	8000000	560000	12176925	10314675	-1862250	0
600000	0.018	553200	1020000	3020472	127764	3148236	2421720	836438	8000000	560000	1.30047e+07	1.23375e+07	-667208	0
700000	0.021	643300	1190000	3512418	154791	3667209	2820930	972670	8000000	560000	1.38299e+07	1.43469e+07	516998	516998
800000	0.024	732800	1360000	4.00109e+06	183456	4184544	3218880	1.10799e+06	8000000	560000	1.46525e+07	1.63429e+07	1.69037e+06	1.69037e+06
900000	0.027	821700	1530000	4486482	213759	4700241	3615570	1.24241e+06	8000000	560000	1.54727e+07	1.83256e+07	2.8529e+06	2.8529e+06
1000000	0.03	910000	1700000	4.9686e+06	245700	5.2143e+06	4.011e+06	1375920	8000000	560000	16290220	20294820	4004600	4004600
1100000	0.033	997700	1870000	5.44744e+06	279279	5.72672e+06	4.40517e+06	1.50852e+06	8000000	560000	1.71052e+07	2.22507e+07	5.14546e+06	5.14546e+06
1200000	0.036	1084800	2040000	5923008	314496	6237504	4798080	1.64022e+06	8000000	560000	1.79177e+07	2.41932e+07	6275488	6275488
1300000	0.039	1171300	2210000	6395298	351351	6746649	5189730	1.77101e+06	8000000	560000	1.87277e+07	2.61223e+07	7394678	7394678
1400000	0.042	1.2572e+06	2380000	6.86431e+06	389844	7254156	5580120	1.90089e+06	8000000	560000	1.9535e+07	2.80381e+07	8.50303e+06	8.50303e+06
1500000	0.045	1.3425e+06	2550000	7.33005e+06	429975	7760025	5969250	2.02986e+06	8000000	560000	20339885	2.99404e+07	9.60055e+06	9.60055e+06
1600000	0.048	1.4272e+06	2720000	7.79251e+06	471744	8264256	6357120	2.15793e+06	8000000	560000	2.11422e+07	3.18294e+07	1.06872e+07	1.06872e+07
1700000	0.051	1.5113e+06	2890000	8.2517e+06	515151	8766849	6743730	2.28509e+06	8000000	560000	2.19419e+07	3.3705e+07	1.17631e+07	1.17631e+07
1800000	0.054	1.5948e+06	3060000	8707608	560196	9267804	7129080	2.41134e+06	8000000	560000	2.27391e+07	3.55672e+07	1.28281e+07	1.28281e+07
1900000	0.057	1.6777e+06	3230000	9160242	606879	9767121	7513170	2.53668e+06	8000000	560000	2.35338e+07	3.74161e+07	13882262	13882262
2000000	0.06	1.76e+06	3400000	9609600	655200	10264800	7896000	2661120	8000000	560000	24325920	39251520	14925600	14925600
2100000	0.063	1.8417e+06	3570000	1.00557e+07	705159	1.07608e+07	8.27757e+06	2.78465e+06	8000000	560000	2.51155e+07	4.10736e+07	15958102	15958102
2200000	0.066	1.9228e+06	3740000	1.04985e+07	756756	1.12552e+07	8.65788e+06	2.90727e+06	8000000	560000	2.59025e+07	4.28823e+07	1.69798e+07	1.69798e+07
2300000	0.069	2003300	3910000	10938018	809991	11748009	9036930	3.02899e+06	8000000	560000	2.6687e+07	4.46776e+07	17990598	17990598
2400000	0.072	2.0832e+06	4080000	1.13743e+07	864864	1.22391e+07	9.41472e+06	3.1498e+06	8000000	560000	2.74689e+07	4.64595e+07	1.89906e+07	1.89906e+07
2500000	0.075	2162500	4250000	11807250	921375	12728625	9791250	3269700	8000000	560000	28248325	48228075	19979750	19979750
2600000	0.078	2.2412e+06	4420000	1.2237e+07	979524	13216476	10166520	3.38869e+06	8000000	560000	2.90252e+07	4.99832e+07	2.09581e+07	2.09581e+07
2700000	0.081	2319300	4590000	12663378	1039311	13702689	10540530	3.50678e+06	8000000	560000	2.97995e+07	5.1725e+07	21925558	21925558
2800000	0.084	2.3968e+06	4760000	1.30865e+07	1.10074e+06	14187264	10913280	3.62396e+06	8000000	560000	3.05712e+07	5.34534e+07	2.28822e+07	2.28822e+07
2900000	0.087	2473700	4930000	13506402	1163799	14670201	11284770	3.74023e+06	8000000	560000	3.13404e+07	5.51685e+07	2.3828e+07	2.3828e+07
3000000	0.09	2550000	5100000	13923000	1228500	15151500	11655000	3855600	8000000	560000	32107100	56870100	24763000	24763000
3100000	0.093	2625700	5270000	14336322	1294839	15631161	12023970	3.97006e+06	8000000	560000	3.28712e+07	5.85584e+07	2.56871e+07	2.56871e+07
3200000	0.096	2700800	5440000	14746368	1362816	16109184	12391680	4.08361e+06	8000000	560000	3.36328e+07	6.02332e+07	26600448	26600448
3300000	0.099	2775300	5610000	15153138	1432431	16585569	12758130	4.19625e+06	8000000	560000	3.43918e+07	6.18947e+07	27502918	27502918
3400000	0.102	2849200	5780000	15556632	1503684	17060316	13123320	4.30799e+06	8000000	560000	3.51483e+07	6.35429e+07	2.83946e+07	2.83946e+07
3500000	0.105	2922500	5950000	15956850	1576575	17533425	13487250	4418820	8000000	560000	35902245	6.51776e+07	2.92754e+07	2.92754e+07
3600000	0.108	2995200	6120000	16353792	1651104	18004896	13849920	4.52874e+06	8000000	560000	3.66536e+07	6.6799e+07	3.01453e+07	3.01453e+07
3700000	0.111	3067300	6290000	16747458	1727271	18474729	14211330	4.63776e+06	8000000	560000	3.74025e+07	6.84069e+07	3.10044e+07	3.10044e+07
3800000	0.114	3138800	6460000	17137848	1805076	18942924	14571480	4.74587e+06	8000000	560000	3.81488e+07	7.00015e+07	3.18527e+07	3.18527e+07
3900000	0.117	3209700	6630000	17524962	1884519	19409481	14930370	4.85307e+06	8000000	560000	3.88925e+07	7.15827e+07	3.26902e+07	3.26902e+07
4000000	0.12	3280000	6800000	17908800	1965600	19874400	15288000	4959360	8000000	560000	39633760	73150560	33516800	33516800
4100000	0.123	3349700	6970000	18289362	2048319	20337681	15644370	5.06475e+06	8000000	560000	4.03724e+07	7.4705e+07	3.43326e+07	3.43326e+07
4200000	0.126	3418800	7140000	18666648	2132676	20799324	15999480	5.16923e+06	8000000	560000	4.11085e+07	7.62461e+07	3.51375e+07	3.51375e+07
4300000	0.129	3.4873e+06	7310000	19040658	2.21867e+06	21259329	16353330	5.2728e+06	8000000	560000	4.18421e+07	7.77738e+07	3.59316e+07	3.59316e+07
4400000	0.132	3.5552e+06	7480000	19411392	2.3063e+06	21717696	16705920	5.37546e+06	8000000	560000	4.25732e+07	7.92881e+07	3.67149e+07	3.67149e+07
4500000	0.135	3.6225e+06	7650000	1.97788e+07	2.39558e+06	2.21744e+07	1.70572e+07	5477220	8000000	560000	43301645	80788995	37487350	37487350
4600000	0.138	3.6892e+06	7820000	2.0143e+07	2.48648e+06	2.26295e+07	1.74073e+07	5.57807e+06	8000000	560000	4.40276e+07	8.22765e+07	38248952	38248952
4700000	0.141	3.7553e+06	7990000	2.05039e+07	2.57903e+06	2.3083e+07	1.77561e+07	5.67801e+06	8000000	560000	4.4751e+07	8.37507e+07	3.89997e+07	3.89997e+07
4800000	0.144	3.8208e+06	8160000	2.08616e+07	2.67322e+06	2.35348e+07	1.81037e+07	5.77705e+06	8000000	560000	4.54718e+07	8.52115e+07	3.97396e+07	3.97396e+07
4900000	0.147	3.8857e+06	8330000	2.12159e+07	2.76904e+06	2.3985e+07	1.845e+07	5.87518e+06	8000000	560000	4.61901e+07	8.66589e+07	4.04687e+07	4.04687e+07
5000000	0.15	3.95e+06	8500000	2.1567e+07	2.8665e+06	2.44335e+07	1.8795e+07	5.9724e+06	8000000	560000	46905900	8.80929e+07	4.1187e+07	4.1187e+07
0	0	0	0	0	0	0	0	0	9000000	630000	9000000	0	-9000000	0
100000	0.00266667	93733.3	170000	511784	17108	528892	406840	141725	9000000	630000	9.84062e+06	2.09044e+06	-7.75018e+06	0
200000	0.00533333	186933	340000	1.02066e+06	35672	1.05633e+06	812560	282643	9000000	630000	1.0679e+07	4.16899e+06	-6.50998e+06	0
300000	0.008	279600	510000	1526616	55692	1582308	1217160	422755	9000000	630000	1.15151e+07	6.23564e+06	-5.27942e+06	0
400000	0.0106667	371733	680000	2.02966e+06	77168	2106832	1620640	562061	9000000	630000	1.23489e+07	8.2904e+06	-4058496	0
500000	0.0133333	463333	850000	2529800	100100	2629900	2023000	700560	9000000	630000	13180460	10333260	-2847200	0
600000	0.016	554400	1020000	3027024	124488	3151512	2424240	838253	9000000	630000	1.40098e+07	1.23642e+07	-1645536	0
700000	0.0186667	644933	1190000	3.52134e+06	150332	3.67167e+06	2.82436e+06	975139	9000000	630000	1.48368e+07	1.43833e+07	-453504	0
800000	0.0213333	734933	1360000	4.01274e+06	177632	4.19037e+06	3.22336e+06	1.11122e+06	9000000	630000	1.56616e+07	1.63905e+07	728896	728896
900000	0.024	824400	1530000	4501224	206388	4707612	3621240	1.24649e+06	9000000	630000	1.64841e+07	1.83858e+07	1.90166e+06	1.90166e+06
1000000	0.0266667	913333	1700000	4986800	236600	5223400	4018000	1380960	9000000	630000	17304360	20369160	3064800	3064800
1100000	0.0293333	1.00173e+06	1870000	5469464	268268	5737732	4413640	1.51462e+06	9000000	630000	1.81224e+07	2.23407e+07	4218304	4218304
1200000	0.032	1089600	2040000	5949216	301392	6250608	4808160	1.64748e+06	9000000	630000	1.89381e+07	2.43003e+07	5.36218e+06	5.36218e+06
1300000	0.0346667	1.17693e+06	2210000	6426056	335972	6762028	5201560	1.77952e+06	9000000	630000	1.97516e+07	2.6248e+07	6.49642e+06	6.49642e+06
1400000	0.0373333	1.26373e+06	2380000	6.89998e+06	372008	7.27199e+06	5.59384e+06	1.91076e+06	9000000	630000	2.05628e+07	2.81838e+07	7.62102e+06	7.62102e+06
1500000	0.04	1.35e+06	2550000	7.371e+06	409500	7780500	5985000	2.0412e+06	9000000	630000	21371700	3.01077e+07	8.736e+06	8.736e+06
1600000	0.0426667	1.43573e+06	2720000	7.8391e+06	448448	8.28755e+06	6.37504e+06	2.17083e+06	9000000	630000	2.21784e+07	3.20197e+07	9.84134e+06	9.84134e+06
1700000	0.0453333	1.52093e+06	2890000	8.3043e+06	488852	8793148	6763960	2.29965e+06	9000000	630000	2.29828e+07	3.39199e+07	1.09371e+07	1.09371e+07
1800000	0.048	1.6056e+06	3060000	8766576	530712	9297288	7151760	2.42767e+06	9000000	630000	2.3785e+07	3.58081e+07	1.20231e+07	1.20231e+07
1900000	0.0506667	1.68973e+06	3230000	9225944	574028	9799972	7538440	2.55488e+06	9000000	630000	2.45848e+07	3.76844e+07	1.30996e+07	1.30996e+07
2000000	0.0533333	1.77333e+06	3400000	9682400	618800	10301200	7924000	2681280	9000000	630000	25382480	39548880	14166400	14166400
2100000	0.056	1.8564e+06	3570000	1.01359e+07	665028	1.0801e+07	8.30844e+06	2.80688e+06	9000000	630000	2.61778e+07	4.14014e+07	15223584	15223584
2200000	0.0586667	1.93893e+06	3740000	10586576	712712	11299288	8691760	2.93167e+06	9000000	630000	2.6971e+07	4.32421e+07	1.62711e+07	1.62711e+07
2300000	0.0613333	2.02093e+06	3910000	1.10343e+07	761852	1.17961e+07	9.07396e+06	3.05565e+06	9000000	630000	2.77618e+07	4.50709e+07	1.73091e+07	1.73091e+07
2400000	0.064	2.1024e+06	4080000	1.14791e+07	812448	12291552	9455040	3.17883e+06	9000000	630000	2.85504e+07	4.68877e+07	1.83373e+07	1.83373e+07
2500000	0.0666667	2.18333e+06	4250000	1.1921e+07	864500	1.27855e+07	9.835e+06	3.3012e+06	9000000	630000	29336700	4.86927e+07	1.9356e+07	1.9356e+07
2600000	0.0693333	2.26373e+06	4420000	1.236e+07	918008	1.3278e+07	1.02138e+07	3.42276e+06	9000000	630000	3.01208e+07	5.04858e+07	2.0365e+07	2.0365e+07
2700000	0.072	2343600	4590000	12796056	972972	13769028	10591560	3.54352e+06	9000000	630000	3.09026e+07	5.2267e+07	2.13644e+07	2.13644e+07
2800000	0.0746667	2.42293e+06	4760000	1.32292e+07	1.02939e+06	1.42586e+07	1.09682e+07	3.66348e+06	9000000	630000	3.16821e+07	5.40363e+07	22354176	22354176
2900000	0.0773333	2.50173e+06	4930000	1.36595e+07	1.08727e+06	1.47467e+07	1.13436e+07	3.78262e+06	9000000	630000	3.24594e+07	5.57937e+07	2.33343e+07	2.33343e+07
3000000	0.08	2580000	5100000	14086800	1146600	15233400	11718000	3900960	9000000	630000	33234360	57539160	24304800	24304800
3100000	0.0826667	2.65773e+06	5270000	1.45112e+07	1.20739e+06	1.57186e+07	1.20912e+07	4.01849e+06	9000000	630000	3.40071e+07	5.92728e+07	2.52657e+07	2.52657e+07
3200000	0.0853333	2.73493e+06	5440000	1.49327e+07	1.26963e+06	1.62024e+07	1.24634e+07	4.13522e+06	9000000	630000	3.47776e+07	6.09945e+07	26216896	26216896
3300000	0.088	2811600	5610000	15351336	1333332	16684668	12834360	4.25114e+06	9000000	630000	3.55458e+07	6.27043e+07	27158496	27158496
3400000	0.0906667	2.88773e+06	5780000	1.5767e+07	1.39849e+06	17165512	13204240	4.36625e+06	9000000	630000	3.63118e+07	6.44022e+07	2.80905e+07	2.80905e+07
3500000	0.0933333	2.96333e+06	5950000	1.61798e+07	1.4651e+06	1.76449e+07	1.3573e+07	4480560	9000000	630000	37075460	6.60883e+07	2.90128e+07	2.90128e+07
3600000	0.096	3038400	6120000	16589664	1533168	18122832	13940640	4.59406e+06	9000000	630000	3.78369e+07	6.77624e+07	29925504	29925504
3700000	0.0986667	3.11293e+06	6290000	16996616	1.60269e+06	18599308	14307160	4.70676e+06	9000000	630000	3.85961e+07	6.94246e+07	3.08286e+07	3.08286e+07
3800000	0.101333	3.18693e+06	6460000	1.74007e+07	1.67367e+06	1.90743e+07	1.46726e+07	4.81864e+06	9000000	630000	3.9353e+07	7.1075e+07	31722016	31722016
3900000	0.104	3260400	6630000	17801784	1746108	19547892	15036840	4.92972e+06	9000000	630000	4.01076e+07	7.27134e+07	32605824	32605824
4000000	0.106667	3.33333e+06	6800000	18200000	1.82e+06	20020000	15400000	5040000	9000000	630000	40860000	74340000	33480000	33480000
4100000	0.109333	3.40573e+06	6970000	1.85953e+07	1.89535e+06	2.04907e+07	1.5762e+07	5.14947e+06	9000000	630000	4.16101e+07	7.59547e+07	3.43445e+07	3.43445e+07
4200000	0.112	3477600	7140000	18987696	1972152	20959848	16122960	5.25813e+06	9000000	630000	4.2358e+07	7.75574e+07	35199456	35199456
4300000	0.114667	3.54893e+06	7310000	19377176	2.05041e+06	21427588	16482760	5.36599e+06	9000000	630000	4.31036e+07	7.91483e+07	3.60447e+07	3.60447e+07
4400000	0.117333	3.61973e+06	7480000	19763744	2130128	21893872	16841440	5.47304e+06	9000000	630000	4.38469e+07	8.07273e+07	3.68804e+07	3.68804e+07
4500000	0.12	3690000	7650000	20147400	2211300	22358700	17199000	5579280	9000000	630000	44587980	82294380	37706400	37706400
4600000	0.122667	3.75973e+06	7820000	20528144	2.29393e+06	22822072	17555440	5.68472e+06	9000000	630000	4.53268e+07	8.38496e+07	3.85228e+07	3.85228e+07
4700000	0.125333	3.82893e+06	7990000	20905976	2.37801e+06	23283988	17910760	5.78935e+06	9000000	630000	4.60633e+07	8.53929e+07	39329536	39329536
4800000	0.128	3.8976e+06	8160000	2.12809e+07	2.46355e+06	2.37444e+07	1.8265e+07	5.89317e+06	9000000	630000	4.67976e+07	8.69243e+07	4.01267e+07	4.01267e+07
4900000	0.130667	3.96573e+06	8330000	21652904	2.55055e+06	24203452	18618040	5.99619e+06	9000000	630000	4.75296e+07	8.84438e+07	4.09141e+07	4.09141e+07
5000000	0.133333	4.03333e+06	8500000	22022000	2.639e+06	24661000	18970000	6098400	9000000	630000	48259400	89951400	41692000	41692000
0	0	0	0	0	0	0	0	0	10000000	700000	10000000	0	-10000000	0
100000	0.0024	93760	170000	511930	17035.2	528965	406896	141765	10000000	700000	1.08407e+07	2.09104e+06	-8.74969e+06	0
200000	0.0048	187040	340000	1.02124e+06	35380.8	1.05662e+06	812784	282804	10000000	700000	1.16794e+07	4.17137e+06	-7.50806e+06	0
300000	0.0072	279840	510000	1.52793e+06	55036.8	1.58296e+06	1217664	423118	10000000	700000	1.25161e+07	6.24099e+06	-6.27509e+06	0
400000	0.0096	372160	680000	2.03199e+06	76003.2	2.108e+06	1.62154e+06	562706	10000000	700000	1.33507e+07	8.29991e+06	-5.05079e+06	0
500000	0.012	464000	850000	2.53344e+06	98280	2.63172e+06	2.0244e+06	701568	10000000	700000	14183288	10348128	-3835160	0
600000	0.0144	555360	1020000	3.03227e+06	121867	3.15413e+06	2426256	839704	10000000	700000	1.50138e+07	1.23856e+07	-2.6282e+06	0
700000	0.0168	646240	1190000	3.52847e+06	146765	3.67524e+06	2.8271e+06	977115	10000000	700000	1.58424e+07	1.44124e+07	-1.42991e+06	0
800000	0.0192	736640	1360000	4.02205e+06	172973	4.19503e+06	3226944	1.1138e+06	10000000	700000	1.66688e+07	1.64285e+07	-240282	0
900000	0.0216	826560	1530000	4.51302e+06	200491	4.71351e+06	3.62578e+06	1.24976e+06	10000000	700000	1.74933e+07	1.84339e+07	940674	940674
1000000	0.024	916000	1700000	5.00136e+06	229320	5.23068e+06	4.0236e+06	1384992	10000000	700000	18315672	20428632	2112960	2112960
1100000	0.0264	1004960	1870000	5.48708e+06	259459	5.74654e+06	4420416	1.5195e+06	10000000	700000	1.9136e+07	2.24126e+07	3.27658e+06	3.27658e+06
1200000	0.0288	1.09344e+06	2040000	5.97018e+06	290909	6.26109e+06	4816224	1.65328e+06	10000000	700000	1.99544e+07	2.43859e+07	4.43153e+06	4.43153e+06
1300000	0.0312	1181440	2210000	6.45066e+06	323669	6.77433e+06	5211024	1.78634e+06	10000000	700000	2.07707e+07	2.63485e+07	5.57781e+06	5.57781e+06
1400000	0.0336	1268960	2380000	6.92852e+06	357739	7.28626e+06	5604816	1.91867e+06	10000000	700000	2.15849e+07	2.83003e+07	6.71542e+06	6.71542e+06
1500000	0.036	1.356e+06	2550000	7.40376e+06	393120	7796880	5997600	2.05027e+06	10000000	700000	22397152	3.02415e+07	7.84436e+06	7.84436e+06
1600000	0.0384	1442560	2720000	7.87638e+06	429811	8.30619e+06	6389376	2.18115e+06	10000000	700000	2.32073e+07	3.2172e+07	8.96463e+06	8.96463e+06
1700000	0.0408	1528640	2890000	8.34637e+06	467813	8.81419e+06	6.78014e+06	2.3113e+06	10000000	700000	2.40155e+07	3.40917e+07	1.00762e+07	1.00762e+07
1800000	0.0432	1.61424e+06	3060000	8.81375e+06	507125	9.32088e+06	7.1699e+06	2.44073e+06	10000000	700000	2.48216e+07	3.60008e+07	1.11792e+07	1.11792e+07
1900000	0.0456	1699360	3230000	9.27851e+06	547747	9.82625e+06	7.55866e+06	2.56943e+06	10000000	700000	2.56257e+07	3.78991e+07	1.22734e+07	1.22734e+07
2000000	0.048	1.784e+06	3400000	9740640	589680	10330320	7946400	2697408	10000000	700000	26427728	39786768	13359040	13359040
2100000	0.0504	1868160	3570000	1.02002e+07	632923	1.08331e+07	8.33314e+06	2.82466e+06	10000000	700000	2.72277e+07	4.16637e+07	1.4436e+07	1.4436e+07
2200000	0.0528	1951840	3740000	1.0657e+07	677477	1.13345e+07	8718864	2.95118e+06	10000000	700000	2.80257e+07	4.35299e+07	1.55042e+07	1.55042e+07
2300000	0.0552	2.03504e+06	3910000	1.11113e+07	723341	1.18347e+07	9103584	3.07698e+06	10000000	700000	2.88216e+07	4.53855e+07	1.65638e+07	1.65638e+07
2400000	0.0576	2117760	4080000	1.1563e+07	770515	1.23335e+07	9.4873e+06	3.20205e+06	10000000	700000	2.96155e+07	4.72303e+07	1.76147e+07	1.76147e+07
2500000	0.06	2.2e+06	4250000	1.2012e+07	819000	12831000	9870000	3.3264e+06	10000000	700000	30407400	4.90644e+07	1.8657e+07	1.8657e+07
2600000	0.0624	2281760	4420000	1.24584e+07	868795	1.33272e+07	1.02517e+07	3.45002e+06	10000000	700000	3.11972e+07	5.08878e+07	1.96906e+07	1.96906e+07
2700000	0.0648	2363040	4590000	1.29022e+07	919901	1.38221e+07	10632384	3.57292e+06	10000000	700000	3.1985e+07	5.27005e+07	2.07155e+07	2.07155e+07
2800000	0.0672	2.44384e+06	4760000	1.33434e+07	972317	1.43157e+07	1.10121e+07	3.69509e+06	10000000	700000	3.27708e+07	5.45025e+07	2.17318e+07	2.17318e+07
2900000	0.0696	2524160	4930000	1.37819e+07	1.02604e+06	1.4808e+07	1.13907e+07	3.81653e+06	10000000	700000	3.35545e+07	5.62938e+07	2.27393e+07	2.27393e+07
3000000	0.072	2604000	5100000	14217840	1081080	15298920	11768400	3937248	10000000	700000	34336168	58074408	23738240	23738240
3100000	0.0744	2683360	5270000	1.46511e+07	1.13743e+06	1.57886e+07	1.21451e+07	4.05724e+06	10000000	700000	3.51158e+07	5.98443e+07	2.47285e+07	2.47285e+07
3200000	0.0768	2762240	5440000	1.50818e+07	1.19508e+06	1.62769e+07	12520704	4.17651e+06	10000000	700000	3.58934e+07	6.16035e+07	2.57101e+07	2.57101e+07
3300000	0.0792	2840640	5610000	1.55099e+07	1.25405e+06	1.67639e+07	12895344	4.29505e+06	10000000	700000	3.6669e+07	6.3352e+07	2.6683e+07	2.6683e+07
3400000	0.0816	2918560	5780000	1.59353e+07	1.31433e+06	1.72497e+07	13268976	4.41286e+06	10000000	700000	3.74425e+07	6.50897e+07	2.76472e+07	2.76472e+07
3500000	0.084	2996000	5950000	16358160	1375920	17734080	13641600	4529952	10000000	700000	38214032	6.68168e+07	2.86028e+07	2.86028e+07
3600000	0.0864	3.07296e+06	6120000	1.67784e+07	1.43882e+06	1.82172e+07	14013216	4.64632e+06	10000000	700000	3.89835e+07	6.85332e+07	2.95497e+07	2.95497e+07
3700000	0.0888	3149440	6290000	1.71959e+07	1.50303e+06	1.8699e+07	1.43838e+07	4.76195e+06	10000000	700000	3.97509e+07	7.02388e+07	3.04879e+07	3.04879e+07
3800000	0.0912	3225440	6460000	1.76109e+07	1.56855e+06	1.91795e+07	1.47534e+07	4.87687e+06	10000000	700000	4.05163e+07	7.19338e+07	3.14174e+07	3.14174e+07
3900000	0.0936	3.30096e+06	6630000	1.80232e+07	1.63538e+06	1.96586e+07	15122016	4.99105e+06	10000000	700000	4.12797e+07	7.3618e+07	3.23383e+07	3.23383e+07
4000000	0.096	3376000	6800000	18432960	1703520	20136480	15489600	5104512	10000000	700000	42040992	75291552	33250560	33250560
4100000	0.0984	3.45056e+06	6970000	1.88401e+07	1.77297e+06	2.0613e+07	15856176	5.21725e+06	10000000	700000	4.28003e+07	7.69544e+07	3.41541e+07	3.41541e+07
4200000	0.1008	3524640	7140000	1.92445e+07	1.84373e+06	2.10883e+07	1.62217e+07	5.32926e+06	10000000	700000	4.35575e+07	7.86065e+07	3.5049e+07	3.5049e+07
4300000	0.1032	3598240	7310000	1.96464e+07	1.9158e+06	2.15622e+07	1.65863e+07	5.44054e+06	10000000	700000	4.43127e+07	8.02479e+07	3.59352e+07	3.59352e+07
4400000	0.1056	3.67136e+06	7480000	2.00456e+07	1.98919e+06	2.20348e+07	1.69499e+07	5.5511e+06	10000000	700000	4.50659e+07	8.18787e+07	3.68128e+07	3.68128e+07
4500000	0.108	3744000	7650000	20442240	2063880	22506120	17312400	5660928	10000000	700000	45817048	83498688	37681640	37681640
4600000	0.1104	3.81616e+06	7820000	2.08362e+07	2.13988e+06	2.29761e+07	1.76739e+07	5.77003e+06	10000000	700000	4.65662e+07	8.5108e+07	3.85418e+07	3.85418e+07
4700000	0.1128	3.88784e+06	7990000	2.12276e+07	2.2172e+06	2.34448e+07	1.80345e+07	5.87841e+06	10000000	700000	4.73132e+07	8.67066e+07	3.93934e+07	3.93934e+07
4800000	0.1152	3959040	8160000	2.16164e+07	2.29582e+06	2.39122e+07	18393984	5.98607e+06	10000000	700000	4.80582e+07	8.82945e+07	4.02363e+07	4.02363e+07
4900000	0.1176	4.02976e+06	8330000	2.20025e+07	2.37576e+06	2.43782e+07	18752496	6.093e+06	10000000	700000	4.88012e+07	8.98717e+07	4.10705e+07	4.10705e+07
5000000	0.12	4.1e+06	8500000	2.2386e+07	2.457e+06	2.4843e+07	1.911e+07	6.1992e+06	10000000	700000	49542200	9.14382e+07	4.1896e+07	4.1896e+07
0	0	0	0	0	0	0	0	0	11000000	770000	11000000	0	-11000000	0
100000	0.00218182	93781.8	170000	512049	16975.6	529024	406942	141798	11000000	770000	1.18408e+07	2.09152e+06	-9.7493e+06	0
200000	0.00436364	187127	340000	1.02171e+06	35142.5	1.05686e+06	812967	282936	11000000	770000	1.26798e+07	4.17331e+06	-8.50648e+06	0
300000	0.00654545	280036	510000	1.529e+06	54500.7	1.5835e+06	1.21808e+06	423415	11000000	770000	1.35169e+07	6.24537e+06	-7.27154e+06	0
400000	0.00872727	372509	680000	2.0339e+06	75050.2	2.10895e+06	1.62227e+06	563234	11000000	770000	1.43522e+07	8.3077e+06	-6.04449e+06	0
500000	0.0109091	464545	850000	2.53642e+06	96790.9	2.63321e+06	2.02555e+06	702393	11000000	770000	1.51856e+07	1.03603e+07	-4.82531e+06	0
600000	0.0130909	556145	1020000	3.03655e+06	119723	3.15628e+06	2.42791e+06	840892	11000000	770000	1.60172e+07	1.24032e+07	-3.61401e+06	0
700000	0.0152727	647309	1190000	3.53431e+06	143846	3.67815e+06	2.82935e+06	978731	11000000	770000	1.68469e+07	1.44363e+07	-2.4106e+06	0
800000	0.0174545	738036	1360000	4.02968e+06	169161	4.19884e+06	3.22988e+06	1.11591e+06	11000000	770000	1.76748e+07	1.64597e+07	-1.21506e+06	0
900000	0.0196364	828327	1530000	4.52267e+06	195667	4.71833e+06	3.62949e+06	1.25243e+06	11000000	770000	1.85008e+07	1.84734e+07	-27409.5	0
1000000	0.0218182	918182	1700000	5.01327e+06	223364	5.23664e+06	4.02818e+06	1.38829e+06	11000000	770000	1.93249e+07	2.04773e+07	1.15236e+06	1.15236e+06
1100000	0.024	1.0076e+06	1870000	5.5015e+06	252252	5.75375e+06	4.42596e+06	1.52349e+06	11000000	770000	2.01472e+07	2.24715e+07	2.32426e+06	2.32426e+06
1200000	0.0261818	1.09658e+06	2040000	5.98734e+06	282332	6.26967e+06	4.82282e+06	1.65803e+06	11000000	770000	2.09677e+07	2.4456e+07	3.48827e+06	3.48827e+06
1300000	0.0283636	1.18513e+06	2210000	6.47079e+06	313603	6.7844e+06	5.21877e+06	1.79191e+06	11000000	770000	2.17863e+07	2.64307e+07	4.6444e+06	4.6444e+06
1400000	0.0305455	1.27324e+06	2380000	6.95187e+06	346065	7.29794e+06	5.6138e+06	1.92513e+06	11000000	770000	2.26031e+07	2.83957e+07	5.79265e+06	5.79265e+06
1500000	0.0327273	1.36091e+06	2550000	7.43056e+06	379718	7.81028e+06	6.00791e+06	2.05769e+06	11000000	770000	2.3418e+07	3.0351e+07	6.93302e+06	6.93302e+06
1600000	0.0349091	1.44815e+06	2720000	7.90687e+06	414563	8.32144e+06	6.40111e+06	2.1896e+06	11000000	770000	2.4231e+07	3.22965e+07	8.06551e+06	8.06551e+06
1700000	0.0370909	1.53495e+06	2890000	8.3808e+06	450599	8.8314e+06	6.79339e+06	2.32084e+06	11000000	770000	2.50422e+07	3.42324e+07	9.19011e+06	9.19011e+06
1800000	0.0392727	1.62131e+06	3060000	8.85235e+06	487826	9.34017e+06	7.18475e+06	2.45142e+06	11000000	770000	2.58516e+07	3.61584e+07	1.03068e+07	1.03068e+07
1900000	0.0414545	1.70724e+06	3230000	9.32151e+06	526245	9.84776e+06	7.5752e+06	2.58134e+06	11000000	770000	2.66591e+07	3.80748e+07	1.14157e+07	1.14157e+07
2000000	0.0436364	1.79273e+06	3400000	9.78829e+06	565855	1.03541e+07	7.96473e+06	2.7106e+06	11000000	770000	2.74647e+07	3.99814e+07	1.25167e+07	1.25167e+07
2100000	0.0458182	1.87778e+06	3570000	1.02527e+07	606656	1.08593e+07	8.35334e+06	2.83921e+06	11000000	770000	2.82686e+07	4.18783e+07	1.36097e+07	1.36097e+07
2200000	0.048	1.9624e+06	3740000	1.07147e+07	648648	1.13634e+07	8.74104e+06	2.96715e+06	11000000	770000	2.90705e+07	4.37654e+07	1.46949e+07	1.46949e+07
2300000	0.0501818	2.04658e+06	3910000	1.11743e+07	691832	1.18662e+07	9.12782e+06	3.09443e+06	11000000	770000	2.98706e+07	4.56429e+07	1.57723e+07	1.57723e+07
2400000	0.0523636	2.13033e+06	4080000	1.16316e+07	736207	1.23678e+07	9.51369e+06	3.22105e+06	11000000	770000	3.06688e+07	4.75106e+07	1.68417e+07	1.68417e+07
2500000	0.0545455	2.21364e+06	4250000	1.20865e+07	781773	1.28682e+07	9.89864e+06	3.34702e+06	11000000	770000	3.14652e+07	4.93685e+07	1.79033e+07	1.79033e+07
2600000	0.0567273	2.29651e+06	4420000	1.25389e+07	828530	1.33675e+07	1.02827e+07	3.47232e+06	11000000	770000	3.22598e+07	5.12167e+07	1.8957e+07	1.8957e+07
2700000	0.0589091	2.37895e+06	4590000	1.2989e+07	876479	1.38655e+07	1.06658e+07	3.59697e+06	11000000	770000	3.30525e+07	5.30552e+07	2.00028e+07	2.00028e+07
2800000	0.0610909	2.46095e+06	4760000	1.34368e+07	925619	1.43624e+07	1.1048e+07	3.72095e+06	11000000	770000	3.38433e+07	5.4884e+07	2.10407e+07	2.10407e+07
2900000	0.0632727	2.54251e+06	4930000	1.38821e+07	975950	1.4858e+07	1.14293e+07	3.84427e+06	11000000	770000	3.46323e+07	5.6703e+07	2.20707e+07	2.20707e+07
3000000	0.0654545	2.62364e+06	5100000	1.43251e+07	1.02747e+06	1.53525e+07	1.18096e+07	3.96694e+06	11000000	770000	3.54195e+07	5.85123e+07	2.30929e+07	2.30929e+07
3100000	0.0676364	2.70433e+06	5270000	1.47656e+07	1.08019e+06	1.58458e+07	1.21891e+07	4.08894e+06	11000000	770000	3.62048e+07	6.03119e+07	2.41072e+07	2.41072e+07
3200000	0.0698182	2.78458e+06	5440000	1.52038e+07	1.13409e+06	1.63379e+07	1.25676e+07	4.21029e+06	11000000	770000	3.69882e+07	6.21017e+07	2.51135e+07	2.51135e+07
3300000	0.072	2864400	5610000	15639624	1189188	16828812	12945240	4.33097e+06	11000000	770000	3.77698e+07	6.38818e+07	2.61121e+07	2.61121e+07
3400000	0.0741818	2.94378e+06	5780000	1.6073e+07	1.24548e+06	1.73185e+07	1.33219e+07	4.451e+06	11000000	770000	3.85495e+07	6.56522e+07	2.71027e+07	2.71027e+07
3500000	0.0763636	3.02273e+06	5950000	1.65041e+07	1.30295e+06	1.7807e+07	1.36977e+07	4.57036e+06	11000000	770000	3.93274e+07	6.74129e+07	2.80855e+07	2.80855e+07
3600000	0.0785455	3.10124e+06	6120000	1.69328e+07	1.36162e+06	1.82944e+07	1.40726e+07	4.68907e+06	11000000	770000	4.01034e+07	6.91638e+07	2.90603e+07	2.90603e+07
3700000	0.0807273	3.17931e+06	6290000	1.7359e+07	1.42149e+06	1.87805e+07	1.44465e+07	4.80712e+06	11000000	770000	4.08776e+07	7.0905e+07	3.00273e+07	3.00273e+07
3800000	0.0829091	3.25695e+06	6460000	1.77829e+07	1.48254e+06	1.92655e+07	1.48196e+07	4.9245e+06	11000000	770000	4.165e+07	7.26364e+07	3.09864e+07	3.09864e+07
3900000	0.0850909	3.33415e+06	6630000	1.82044e+07	1.54478e+06	1.97492e+07	1.51917e+07	5.04123e+06	11000000	770000	4.24204e+07	7.43581e+07	3.19377e+07	3.19377e+07
4000000	0.0872727	3.41091e+06	6800000	1.86236e+07	1.60822e+06	2.02318e+07	1.55629e+07	5.15729e+06	11000000	770000	4.31891e+07	7.60701e+07	3.2881e+07	3.2881e+07
4100000	0.0894545	3.48724e+06	6970000	1.90403e+07	1.67284e+06	2.07132e+07	1.59332e+07	5.2727e+06	11000000	770000	4.39559e+07	7.77723e+07	3.38165e+07	3.38165e+07
4200000	0.0916364	3.56313e+06	7140000	1.94547e+07	1.73866e+06	2.11933e+07	1.63026e+07	5.38745e+06	11000000	770000	4.47208e+07	7.94649e+07	3.47441e+07	3.47441e+07
4300000	0.0938182	3.63858e+06	7310000	1.98667e+07	1.80567e+06	2.16723e+07	1.6671e+07	5.50154e+06	11000000	770000	4.54839e+07	8.11477e+07	3.56638e+07	3.56638e+07
4400000	0.096	3713600	7480000	20276256	1873872	22150128	17038560	5.61496e+06	11000000	770000	4.62451e+07	8.28207e+07	36575616	36575616
4500000	0.0981818	3.78818e+06	7650000	2.06835e+07	1.94326e+06	2.26267e+07	1.74052e+07	5.72773e+06	11000000	770000	4.70045e+07	8.4484e+07	3.74796e+07	3.74796e+07
4600000	0.100364	3.86233e+06	7820000	2.10883e+07	2.01385e+06	2.31022e+07	1.77709e+07	5.83984e+06	11000000	770000	4.7762e+07	8.61376e+07	3.83756e+07	3.83756e+07
4700000	0.102545	3.93604e+06	7990000	2.14908e+07	2.08562e+06	2.35764e+07	1.81357e+07	5.95129e+06	11000000	770000	4.85177e+07	8.77815e+07	3.92638e+07	3.92638e+07
4800000	0.104727	4.00931e+06	8160000	2.18908e+07	2.15859e+06	2.40494e+07	1.84995e+07	6.06208e+06	11000000	770000	4.92715e+07	8.94156e+07	4.01441e+07	4.01441e+07
4900000	0.106909	4.08215e+06	8330000	2.22885e+07	2.23274e+06	2.45213e+07	1.88625e+07	6.1722e+06	11000000	770000	5.00235e+07	9.104e+07	4.10165e+07	4.10165e+07
5000000	0.109091	4.15455e+06	8500000	2.26838e+07	2.30809e+06	2.49919e+07	1.92245e+07	6.28167e+06	11000000	770000	5.07736e+07	9.26547e+07	4.18811e+07	4.18811e+07
0	0	0	0	0	0	0	0	0	12000000	840000	12000000	0	-12000000	0
100000	0.002	93800	170000	512148	16926	529074	406980	141826	12000000	840000	1.28409e+07	2.09193e+06	-10748972	0
200000	0.004	187200	340000	1022112	34944	1057056	813120	283046	12000000	840000	1.36801e+07	4.17493e+06	-9505168	0
300000	0.006	280200	510000	1529892	54054	1583946	1218420	423662	12000000	840000	1.45176e+07	6.24902e+06	-8268588	0
400000	0.008	372800	680000	2035488	74256	2109744	1622880	563674	12000000	840000	1.53534e+07	8.31419e+06	-7.03923e+06	0
500000	0.01	465000	850000	2.5389e+06	95550	2.63445e+06	2.0265e+06	703080	12000000	840000	16187530	10370430	-5817100	0
600000	0.012	556800	1020000	3040128	117936	3158064	2429280	841882	12000000	840000	1.70199e+07	1.24178e+07	-4602192	0
700000	0.014	648200	1190000	3539172	141414	3680586	2831220	980078	12000000	840000	1.78507e+07	1.44562e+07	-3.39451e+06	0
800000	0.016	739200	1360000	4036032	165984	4202016	3232320	1.11767e+06	12000000	840000	1.86797e+07	1.64856e+07	-2.19405e+06	0
900000	0.018	829800	1530000	4530708	191646	4722354	3632580	1.25466e+06	12000000	840000	1.9507e+07	1.85062e+07	-1.00081e+06	0
1000000	0.02	920000	1700000	5.0232e+06	218400	5.2416e+06	4.032e+06	1391040	12000000	840000	20332640	20517840	185200	185200
1100000	0.022	1.0098e+06	1870000	5.51351e+06	246246	5.75975e+06	4.43058e+06	1.52682e+06	12000000	840000	2.11566e+07	2.25206e+07	1.36399e+06	1.36399e+06
1200000	0.024	1099200	2040000	6001632	275184	6276816	4828320	1.66199e+06	12000000	840000	2.19788e+07	2.45144e+07	2.53555e+06	2.53555e+06
1300000	0.026	1188200	2210000	6487572	305214	6792786	5225220	1.79656e+06	12000000	840000	2.27993e+07	2.64992e+07	3.69989e+06	3.69989e+06
1400000	0.028	1276800	2380000	6971328	336336	7307664	5621280	1.93052e+06	12000000	840000	2.36182e+07	2.84752e+07	4857008	4857008
1500000	0.03	1.365e+06	2550000	7.4529e+06	368550	7821450	6016500	2.06388e+06	12000000	840000	24435330	3.04422e+07	6.0069e+06	6.0069e+06
1600000	0.032	1.4528e+06	2720000	7.93229e+06	401856	8334144	6410880	2.19663e+06	12000000	840000	2.52508e+07	3.24003e+07	7.14957e+06	7.14957e+06
1700000	0.034	1.5402e+06	2890000	8409492	436254	8845746	6804420	2.32878e+06	12000000	840000	2.60645e+07	3.43495e+07	8285012	8285012
1800000	0.036	1.6272e+06	3060000	8884512	471744	9356256	7197120	2.46033e+06	12000000	840000	2.68766e+07	3.62898e+07	9413232	9413232
1900000	0.038	1.7138e+06	3230000	9357348	508326	9865674	7588980	2.59127e+06	12000000	840000	2.76869e+07	3.82212e+07	1.05342e+07	1.05342e+07
2000000	0.04	1.8e+06	3400000	9.828e+06	546000	1.0374e+07	7.98e+06	2721600	12000000	840000	28495600	40143600	11648000	11648000
2100000	0.042	1.8858e+06	3570000	1.02965e+07	584766	1.08812e+07	8.37018e+06	2.85133e+06	12000000	840000	2.93026e+07	4.20571e+07	1.27545e+07	1.27545e+07
2200000	0.044	1.9712e+06	3740000	1.07628e+07	624624	1.13874e+07	8.75952e+06	2.98045e+06	12000000	840000	3.01078e+07	4.39617e+07	1.38539e+07	1.38539e+07
2300000	0.046	2.0562e+06	3910000	1.12269e+07	665574	1.18924e+07	9.14802e+06	3.10897e+06	12000000	840000	3.09114e+07	4.58574e+07	1.4946e+07	1.4946e+07
2400000	0.048	2140800	4080000	11688768	707616	12396384	9535680	3.23689e+06	12000000	840000	3.17133e+07	4.77441e+07	16030848	16030848
2500000	0.05	2.225e+06	4250000	1.21485e+07	750750	12899250	9922500	3.3642e+06	12000000	840000	32513450	4.96219e+07	1.71085e+07	1.71085e+07
2600000	0.052	2.3088e+06	4420000	1.2606e+07	794976	13401024	10308480	3.49091e+06	12000000	840000	3.33119e+07	5.14909e+07	1.81789e+07	1.81789e+07
2700000	0.054	2.3922e+06	4590000	1.30614e+07	840294	13901706	10693620	3.61701e+06	12000000	840000	3.41087e+07	5.33508e+07	1.92421e+07	1.92421e+07
2800000	0.056	2.4752e+06	4760000	1.35146e+07	886704	14401296	11077920	3.7425e+06	12000000	840000	3.49038e+07	5.52019e+07	2.02981e+07	2.02981e+07
2900000	0.058	2.5578e+06	4930000	1.39656e+07	934206	14899794	11461380	3.86739e+06	12000000	840000	3.56972e+07	5.70441e+07	21346868	21346868
3000000	0.06	2.64e+06	5100000	1.44144e+07	982800	15397200	11844000	3.99168e+06	12000000	840000	36488880	5.88773e+07	2.23884e+07	2.23884e+07
3100000	0.062	2.7218e+06	5270000	1.4861e+07	1.03249e+06	15893514	12225780	4.11536e+06	12000000	840000	3.72789e+07	6.07016e+07	23422708	23422708
3200000	0.064	2.8032e+06	5440000	1.53055e+07	1.08326e+06	16388736	12606720	4.23844e+06	12000000	840000	3.80672e+07	6.2517e+07	2.44498e+07	2.44498e+07
3300000	0.066	2.8842e+06	5610000	1.57477e+07	1.13513e+06	16882866	12986820	4.36091e+06	12000000	840000	3.88538e+07	6.43234e+07	2.54697e+07	2.54697e+07
3400000	0.068	2.9648e+06	5780000	1.61878e+07	1.1881e+06	17375904	13366080	4.48278e+06	12000000	840000	3.96387e+07	6.6121e+07	2.64823e+07	2.64823e+07
3500000	0.07	3.045e+06	5950000	1.66257e+07	1.24215e+06	17867850	13744500	4604040	12000000	840000	40421890	67909590	27487700	27487700
3600000	0.072	3124800	6120000	17061408	1297296	18358704	14122080	4.7247e+06	12000000	840000	4.12034e+07	6.96893e+07	2.84859e+07	2.84859e+07
3700000	0.074	3204200	6290000	17494932	1353534	18848466	14498820	4.84475e+06	12000000	840000	4.19832e+07	7.14601e+07	2.94769e+07	2.94769e+07
3800000	0.076	3283200	6460000	17926272	1410864	19337136	14874720	4.9642e+06	12000000	840000	4.27613e+07	7.32219e+07	3.04606e+07	3.04606e+07
3900000	0.078	3361800	6630000	18355428	1469286	19824714	15249780	5.08304e+06	12000000	840000	4.35378e+07	7.49749e+07	3.14371e+07	3.14371e+07
4000000	0.08	3440000	6800000	18782400	1528800	20311200	15624000	5201280	12000000	840000	44312480	76718880	32406400	32406400
4100000	0.082	3517800	6970000	19207188	1589406	20796594	15997380	5.31891e+06	12000000	840000	4.50855e+07	7.8454e+07	3.33685e+07	3.33685e+07
4200000	0.084	3595200	7140000	19629792	1651104	21280896	16369920	5.43594e+06	12000000	840000	4.58568e+07	8.01802e+07	3.43233e+07	3.43233e+07
4300000	0.086	3672200	7310000	20050212	1713894	21764106	16741620	5.55237e+06	12000000	840000	4.66265e+07	8.18974e+07	3.52709e+07	3.52709e+07
4400000	0.088	3748800	7480000	20468448	1777776	22246224	17112480	5.66819e+06	12000000	840000	4.73944e+07	8.36057e+07	3.62113e+07	3.62113e+07
4500000	0.09	3825000	7650000	20884500	1842750	22727250	17482500	5783400	12000000	840000	48160650	85305150	37144500	37144500
4600000	0.092	3900800	7820000	21298368	1908816	23207184	17851680	5.89801e+06	12000000	840000	4.89252e+07	8.69956e+07	3.80704e+07	3.80704e+07
4700000	0.094	3976200	7990000	21710052	1975974	23686026	18220020	6.01201e+06	12000000	840000	4.9688e+07	8.86772e+07	3.89892e+07	3.89892e+07
4800000	0.096	4051200	8160000	22119552	2044224	24163776	18587520	6.12541e+06	12000000	840000	5.04492e+07	9.03499e+07	3.99007e+07	3.99007e+07
4900000	0.098	4125800	8330000	22526868	2113566	24640434	18954180	6.23821e+06	12000000	840000	5.12086e+07	9.20136e+07	4.08049e+07	4.08049e+07
5000000	0.1	4200000	8500000	22932000	2184000	25116000	19320000	6350400	12000000	840000	51966400	93668400	41702000	41702000
